# Supplementary material for: Broad-Spectrum Antiviral Natural Products from the Marine-Derived Penicillium sp. IMB17-046
Source: PubMed Central journal article supplement (PMC6696147; doi:10.3390/molecules24152821), 2019-08-02
Supplement: molecules-24-02821-s001.pdf [file molecules-24-02821-s001.pdf]

# Broad-Spectrum Antiviral Natural Products from the Marine-derived *Penicillium* sp. IMB17-046

Jiao Li <sup>1,†</sup>, Yujia Wang <sup>1,†</sup>, Xiaomeng Hao <sup>1</sup>, Shasha Li <sup>1</sup>, Jia Jia <sup>2</sup>, Yan Guan <sup>1</sup>, Zonggen Peng <sup>1</sup>, Hongkai Bi <sup>2</sup>, Chunling Xiao <sup>1</sup>, Shan Cen <sup>1</sup>, and Maoluo Gan <sup>1,\*</sup>

<sup>1</sup> Institute of Medicinal Biotechnology, Chinese Academy of Medical Sciences and Peking Union Medical College, Beijing 100050, China; jiaoli930911@126.com (J.L.); yujia.wang@imb.pumc.edu.cn (Y.W.); xiaomhao@163.com (X.H.); veraleehp@163.com; guanyan20@163.com (Y.G.); pumcpzg@126.com (Z.P.); shancen@imb.pumc.edu.cn (S.C.); xiaocl318@163.com (C.X.)

<sup>2</sup> Department of Pathogen Biology, Jiangsu Key Laboratory of Pathogen Biology, Nanjing Medical University, Nanjing, Jiangsu, P. R. China; jiajia@njmu.edu.cn; hkbi@njmu.edu.cn (H.B.)

\* Correspondence: ganml@imb.pumc.edu.cn; Tel.: +86-10-63165277

<sup>†</sup> These authors contributed equally to this work.

## Supporting Information

## Contents

|                                                                                                                                                                                              |    |
|----------------------------------------------------------------------------------------------------------------------------------------------------------------------------------------------|----|
| <b>Physical and Spectroscopic data of Compounds 4-8</b> .....                                                                                                                                | 3  |
| <b>Table S1.</b> <sup>13</sup> C (150 MHz) and <sup>1</sup> H (600 MHz) NMR data for (+)-neocitreoviridin ( <b>2</b> ) and (-)-citreoviridin .....                                           | 5  |
| <b>Figure S1.</b> The (+)-HRESIMS spectrum of trypilepyrazinol ( <b>1</b> ).....                                                                                                             | 6  |
| <b>Figure S2.</b> The IR spectrum of trypilepyrazinol ( <b>1</b> ). .....                                                                                                                    | 7  |
| <b>Figure S3.</b> The <sup>1</sup> H NMR spectrum of trypilepyrazinol ( <b>1</b> ) in CDCl <sub>3</sub> (600 MHz). .....                                                                     | 8  |
| <b>Figure S4.</b> The <sup>13</sup> C NMR spectrum of trypilepyrazinol ( <b>1</b> ) in CDCl <sub>3</sub> (150 MHz) .....                                                                     | 9  |
| <b>Figure S5.</b> The DEPT spectrum of trypilepyrazinol ( <b>1</b> ) in CDCl <sub>3</sub> (150 MHz).....                                                                                     | 10 |
| <b>Figure S6.</b> The <sup>1</sup> H- <sup>1</sup> H COSY spectrum of trypilepyrazinol ( <b>1</b> ) in CDCl <sub>3</sub> (600 MHz).....                                                      | 11 |
| <b>Figure S7.</b> The HSQC spectrum of trypilepyrazinol ( <b>1</b> ) in CDCl <sub>3</sub> (600 MHz).....                                                                                     | 12 |
| <b>Figure S8.</b> The HMBC spectrum of trypilepyrazinol ( <b>1</b> ) in CDCl <sub>3</sub> (600 MHz).....                                                                                     | 13 |
| <b>Figure S9.</b> The (+)-HRESIMS spectrum of (+)-neocitreoviridin ( <b>2</b> ). .....                                                                                                       | 14 |
| <b>Figure S10.</b> The IR spectrum of (+)-neocitreoviridin ( <b>2</b> ). .....                                                                                                               | 15 |
| <b>Figure S11.</b> The <sup>1</sup> H NMR spectrum of (+)-neocitreoviridin ( <b>2</b> ) in CDCl <sub>3</sub> (600 MHz). .....                                                                | 16 |
| <b>Figure S12.</b> The <sup>13</sup> C NMR spectrum of (+)-neocitreoviridin ( <b>2</b> ) in CDCl <sub>3</sub> (150 MHz). .....                                                               | 17 |
| <b>Figure S13.</b> The <sup>1</sup> H- <sup>1</sup> H COSY spectrum of (+)-neocitreoviridin ( <b>2</b> ) in CDCl <sub>3</sub> (600 MHz).....                                                 | 18 |
| <b>Figure S14.</b> The HSQC spectrum of (+)-neocitreoviridin ( <b>2</b> ) in CDCl <sub>3</sub> (600 MHz).....                                                                                | 19 |
| <b>Figure S15.</b> The HMBC spectrum of (+)-neocitreoviridin ( <b>2</b> ) in CDCl <sub>3</sub> (600 MHz).....                                                                                | 20 |
| <b>Figure S16.</b> The ROESY spectrum of (+)-neocitreoviridin ( <b>2</b> ) in CDCl <sub>3</sub> (600 MHz). .....                                                                             | 21 |
| <b>Figure S17.</b> The (+)-HRESIMS spectrum of 3β-hydroxyergosta-8,14,24(28)-trien-7-one ( <b>3</b> ).....                                                                                   | 22 |
| <b>Figure S18.</b> The IR spectrum of 3β-hydroxyergosta-8,14,24(28)-trien-7-one ( <b>3</b> ). .....                                                                                          | 23 |
| <b>Figure S19.</b> The <sup>1</sup> H NMR spectrum of 3β-hydroxyergosta-8,14,24(28)-trien-7-one ( <b>3</b> ) in CDCl <sub>3</sub> (600 MHz). .....                                           | 24 |
| <b>Figure S20.</b> The <sup>13</sup> C NMR spectrum of 3β-hydroxyergosta-8,14,24(28)-trien-7-one ( <b>3</b> ) in CDCl <sub>3</sub> (150 MHz). .....                                          | 25 |
| <b>Figure S21.</b> The DEPT spectrum of 3β-hydroxyergosta-8,14,24(28)-trien-7-one ( <b>3</b> ) in CDCl <sub>3</sub> (150 MHz). .....                                                         | 26 |
| <b>Figure S22.</b> The <sup>1</sup> H- <sup>1</sup> H COSY spectrum of 3β-hydroxyergosta-8,14,24(28)-trien-7-one ( <b>3</b> ) in CDCl <sub>3</sub> (600 MHz). .....                          | 27 |
| <b>Figure S23.</b> The HSQC spectrum of 3β-hydroxyergosta-8,14,24(28)-trien-7-one ( <b>3</b> ) in CDCl <sub>3</sub> (600 MHz). .....                                                         | 28 |
| <b>Figure S24.</b> The HMBC spectrum of 3β-hydroxyergosta-8,14,24(28)-trien-7-one ( <b>3</b> ) in CDCl <sub>3</sub> (600 MHz). .....                                                         | 29 |
| <b>Figure S25.</b> The ROESY spectrum of 3β-hydroxyergosta-8,14,24(28)-trien-7-one ( <b>3</b> ) in CDCl <sub>3</sub> (600 MHz) .....                                                         | 30 |
| <b>Figure S26.</b> The <sup>1</sup> H NMR spectrum of epiisocitreoviridinol ( <b>4</b> ) in CDCl <sub>3</sub> (600 MHz). .....                                                               | 31 |
| <b>Figure S27.</b> The <sup>1</sup> H NMR spectrum of citreoviripyron B ( <b>5</b> ) in CDCl <sub>3</sub> (600 MHz). .....                                                                   | 32 |
| <b>Figure S28.</b> The <sup>1</sup> H NMR spectrum of kigelin ( <b>6</b> ) in CDCl <sub>3</sub> (600 MHz). .....                                                                             | 33 |
| <b>Figure S29.</b> The <sup>1</sup> H NMR spectrum of 3β-hydroxyergosta-8,24(28)-dien-7-one ( <b>7</b> ) in CDCl <sub>3</sub> (600 MHz). .....                                               | 34 |
| <b>Figure S30.</b> The <sup>1</sup> H NMR spectrum of (22 <i>E</i> ,24 <i>R</i> )-24-methyl-5α-cholesta-7,22-dien-3β,5,6β-triol ( <b>8</b> ) in DMSO- <i>d</i> <sub>6</sub> (600 MHz). ..... | 35 |
| <b>Figure S31.</b> Optimized conformers (≥ 1%) of 14 <i>S</i> ,15 <i>R</i> ,16 <i>R</i> ,17 <i>R</i> - <b>2</b> at the M06-2X/6-311+G(d,p) level in MeOH .....                               | 36 |
| <b>Table S2.</b> Boltzmann populations of the identified conformers for 14 <i>S</i> ,15 <i>R</i> ,16 <i>R</i> ,17 <i>R</i> - <b>2</b> .....                                                  | 36 |
| <b>Figure S32.</b> Comparison of the experimental and calculated ECD and UV spectra of <b>2</b> .....                                                                                        | 37 |
| <b>Table S3.</b> Calculated ECD data for conformers <b>2-C1</b> and <b>2-C2</b> at the Cam-B3LYP/TZVP//M06-2X/6-311+G(d,p) level in MeOH .....                                               | 38 |
| <b>Table S4.</b> Calculated ECD data for conformers <b>2-C3</b> and <b>2-C4</b> at the Cam-B3LYP/TZVP//M06-2X/6-311+G(d,p) level in MeOH .....                                               | 39 |
| <b>Figure S33.</b> The HPLC analysis of <b>1-3</b> .....                                                                                                                                     | 40 |

## Physical and Spectroscopic data of Compounds 4-8

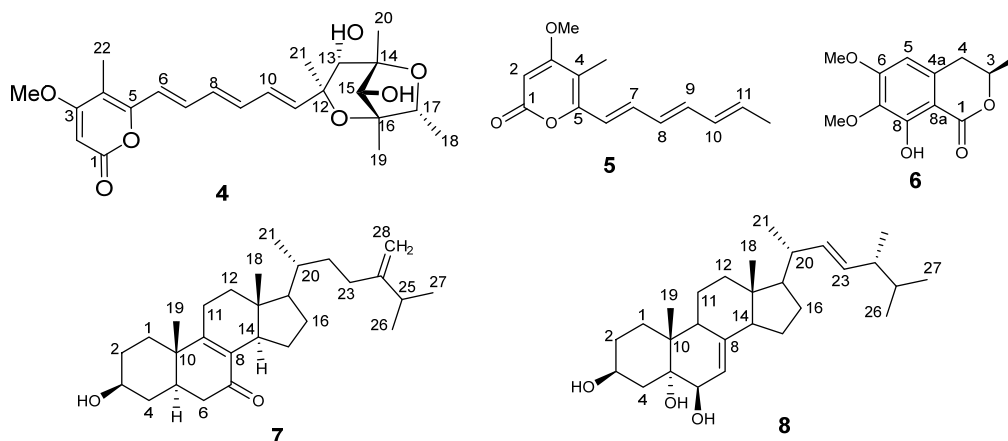

Epiisocitreoviridinol (**4**): yellow needles;  $[\alpha]_D^{20} + 64.0$  (*c* 0.13, MeOH); UV (MeOH)  $\lambda_{\max}$  370(log  $\epsilon$  4.76), 274(4.70)nm; ECD (*c*  $0.3 \times 10^{-3}$  M, MeOH)  $\lambda_{\max}$  ( $\Delta\epsilon$ ) 219 (+7.70) nm, 269 (-11.29), 368 (+4.24) nm; IR  $\nu_{\max}$  3440, 1705, 1409, 1250, 1092, 1406, 1250, 1093, 1016, and 813  $\text{cm}^{-1}$ ;  $^1\text{H-NMR}$  ( $\text{CDCl}_3$ , 600 MHz)  $\delta$  5.50 (s, H-2), 6.36, (d,  $J = 15.0\text{Hz}$ , H-6), 7.18, (dd,  $J = 15.0, 10.8\text{Hz}$ , H-7), 6.34 (dd,  $J = 15.0, 10.8\text{Hz}$ , H-8), 6.44 (dd,  $J = 15.0, 10.8\text{Hz}$ , H-9), 6.35 (dd,  $J = 15.6, 10.8\text{Hz}$ , H-10), 5.96 (d,  $J = 15.6\text{Hz}$ , H-11), 3.58 (d,  $J = 10.8\text{Hz}$ , H-13), 4.26 (brs, H-15), 4.09 (q,  $J = 6.6\text{Hz}$ , H-17), 1.20 (d,  $J = 6.6\text{Hz}$ , H-18), 1.34 (s, H-19), 1.37 (s, H-20), 1.27 (s, H-21), 1.97 (s, H-22), 3.84 (s, OMe-3), 3.30 (d,  $J = 10.8\text{Hz}$ , OH-13);  $^{13}\text{C}$  NMR ( $\text{CDCl}_3$ , 150 MHz) 163.7 (C-1), 88.8 (C-2), 170.6 (C-3), 108.1 (C-4), 154.3 (C-5), 119.4 (C-6), 135.5 (C-7), 131.6 (C-8), 137.0 (C-9), 128.1 (C-10), 146.5 (C-11), 78.2 (C-12), 79.6 (C-13), 82.6 (C-14), 75.2 (C-15), 83.0 (C-16), 80.2 (C-17), 13.2 (C-18), 17.3 (C-19), 18.6 (C-20), 26.5 (C-21), 8.9 (C-22), 56.2 (OMe-3); HRES-MS:  $m/z$  403.2098 [ $\text{M}+\text{H}$ ] $^+$  (calcd for  $\text{C}_{23}\text{H}_{30}\text{O}_7$ , 403.2121).

Citreviripyron B (**5**): yellow powder; UV (MeOH, HPLC)  $\lambda_{\max}$  355nm;  $^1\text{H-NMR}$  ( $\text{CDCl}_3$ , 600 MHz)  $\delta$  5.50 (s, H-2), 6.32 (d,  $J = 15.0$  Hz, H-6), 7.18 (dd,  $J = 15.0, 11.0$  Hz, H-7), 6.25 (dd,  $J = 15.0, 11.0$  Hz, H-8), 6.45 (dd,  $J = 15.0, 10.6$  Hz, H-9), 6.15 (dd,  $J = 15.0, 10.6$  Hz, H-10), 5.90 (m, H-11), 1.84 (d,  $J = 6.0$  Hz, H-12), 1.95 (s, H-13);  $^{13}\text{C}$  NMR ( $\text{CDCl}_3$ , 150 MHz)  $\delta$  163.9 (C-1), 88.7 (C-2), 170.8 (C-3), 107.6 (C-4), 154.8 (C-5), 118.4 (C-6), 136.4 (C-7), 129.2 (C-8), 138.6 (C-9), 131.7 (C-10), 133.8 (C-11), 18.7 (C-12), 9.0 (C-13); LC-MS  $m/z$  233 [ $\text{M}+\text{H}$ ] $^+$ .

Kigelin (**6**): amorphous powder; UV (MeOH, HPLC)  $\lambda_{\max}$  269, 367 nm; ECD (*c*  $0.1 \times 10^{-3}$  M, MeOH)  $\lambda_{\max}$  ( $\Delta\epsilon$ ) 216 (-1.78) nm, 244 (+0.45), 272 (-1.13), 310 (-0.37) nm;  $^1\text{H-NMR}$  ( $\text{CDCl}_3$ , 600 MHz)  $\delta$  4.69 (m, H-3), 2.89 (dd,  $J = 16.2, 10.2$  Hz, H-4a), 2.85 (dd,  $J = 16.2, 4.8$  Hz, H-4b), 6.28 (s, H-5), 1.52 (d,  $J = 6.6$  Hz, Me-3), 3.88 (s, OMe-6), 3.92 (s, OMe-7), 11.15 (s, OH-8);  $^{13}\text{C}$  NMR ( $\text{CDCl}_3$ , 150 MHz)  $\delta$  169.8 (C-1), 75.8 (C-3), 34.7 (C-4), 102.0 (C-5), 158.4 (C-6), 135.3 (C-7), 156.2 (C-8), 102.8 (C-8a), 135.4 (C-4a), 20.7 (Me-3), 56.2 (OMe-6), 60.8 (OMe-7); LC-MS  $m/z$  239 [ $\text{M}+\text{H}$ ] $^+$ .

3 $\beta$ -Hydroxyergosta-8,24(28)-dien-7-one (**7**): white powder; UV (MeOH, HPLC)  $\lambda_{\max}$  251 nm;  $^1\text{H-NMR}$  ( $\text{CDCl}_3$ , 600 MHz)  $\delta$  3.65 (m, H-3), 1.15 (m, H-17), 0.59 (s, H-18), 1.18 (s, H-19), 0.97 (d,  $J = 6.6$  Hz, H-21), 1.55 (m, H-22a), 1.15 (m, H-22b), 2.23 (m, H-25), 1.03 (d,  $J = 6.6$  Hz, H-26), 1.02 (d,  $J = 6.6$  Hz, H-27), 4.72 (brs, H-28a), 4.66 (brs, H-28b), 1.14-1.60 (11H, H-1b, 4b, 12b, 15b, 16b, 17, 20, H<sub>2</sub>-2, H<sub>2</sub>-22), 1.68-2.46 (14H, H-1a, 4a, 5, 12a, 14, 15a, 16a, 25, H<sub>2</sub>-6, H<sub>2</sub>-11, H<sub>2</sub>-23);  $^{13}\text{C}$  NMR ( $\text{DMSO}-d_6$ , 150 MHz)  $\delta$  34.4 (C-1), 31.2 (C-2), 70.1 (C-3), 37.4 (C-4), 41.1 (C-5), 42.5 (C-6), 198.9 (C-7), 133.2 (C-8), 165.1

(C-9), 38.3 (C-10), 25.4 (C-11), 35.7 (C-12), 42.5 (C-13), 48.2 (C-14), 29.2 (C-15), 24.8 (C-16), 53.4 (C-17), 11.4 (C-18), 17.2 (C-19), 36.1 (C-20), 18.8 (C-21), 34.6 (C-22), 31.1 (C-23), 156.7 (C-24), 33.8 (C-25), 22.0 (C-26), 21.9 (C-27), 106.0 (C-28); LC-MS  $m/z$  413  $[M+H]^+$ .

(22*E*,24*R*)-24-Methyl-5 $\alpha$ -cholesta-7,22-dien-3 $\beta$ ,5,6 $\beta$ -triol (**8**): white powder; UV (MeOH, HPLC)  $\lambda_{\max}$  222, 262 nm;  $^1\text{H-NMR}$  ( $\text{CDCl}_3$ , 600 MHz)  $\delta$ 3.76 (m, H-3), 3.37 (m, H-6), 5.08 (m, H-7), 0.54 (s, H-18), 0.91 (s, H-19), 1.00 (d,  $J = 6.6$  Hz, H-21), 5.24 (dd,  $J = 15.0, 7.2$  Hz, H-22), 5.17 (dd,  $J = 15.0, 8.4$  Hz, H-23), 0.80 (d,  $J = 6.6$  Hz, H-26), 0.89 (d,  $J = 6.6$  Hz, H-27), 0.81 (d,  $J = 6.6$  Hz, H-28), 1.20-1.60 (H-1, H-4, H-11, H-15, H-17, H-25), 1.80-2.02 (H-2, H-9, H-12, H-14, H-20, H-24), 4.51 (d,  $J = 4.5$  Hz, OH-6), 4.22 (d,  $J = 5.0$  Hz, OH-3), 3.60 (s, OH-5);  $^{13}\text{C NMR}$  ( $\text{DMSO-}d_6$ , 150 MHz)  $\delta$ 21.3 (C-1), 40.2 (C-2), 66.0 (C-3), 31.2 (C-4), 74.4 (C-5), 72.1 (C-6), 119.4 (C-7), 139.6 (C-8), 42.3 (C-9), 36.6 (C-10), 32.5 (C-11), 39.0 (C-12), 43.0 (C-13), 54.2 (C-14), 22.6 (C-15), 27.8 (C-16), 55.3 (C-17), 12.1 (C-18), 17.7 (C-19), 40.0 (C-20), 21.0 (C-21), 135.4 (C-22), 131.4 (C-23), 42.0 (C-24), 32.5 (C-25), 19.8 (C-26), 19.5 (C-27), 17.3 (C-28); LC-MS  $m/z$  445  $[M+H]^+$ .

**Table S1.**  $^{13}\text{C}$  (150 MHz) and  $^1\text{H}$  (600 MHz) NMR data for (+)-neocitreoviridin (**2**) and (-)-citreoviridin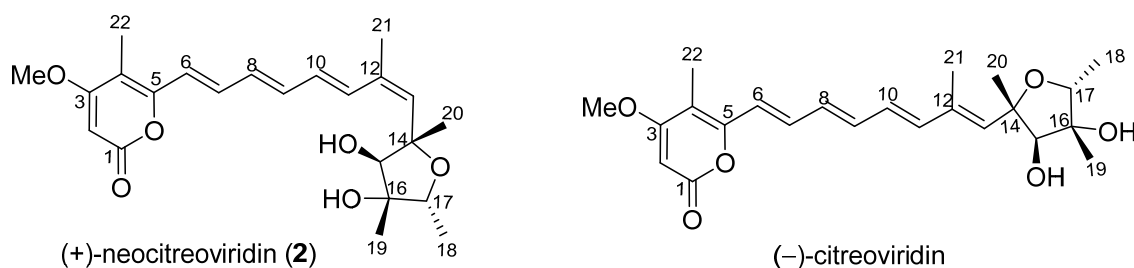

| No. | <b>2</b> ( $\text{CDCl}_3$ )                  |                            | citreoviridin ( $\text{CDCl}_3$ ) <sup>a</sup> |                     | $\Delta\delta_{\text{H}}$ | $\Delta\delta_{\text{C}}$ |
|-----|-----------------------------------------------|----------------------------|------------------------------------------------|---------------------|---------------------------|---------------------------|
|     | $\delta_{\text{H}}$ , mult. ( <i>J</i> in Hz) | $\delta_{\text{C}}$ , type | $\delta_{\text{H}}$ , mult. ( <i>J</i> in Hz)  | $\delta_{\text{C}}$ |                           |                           |
| 1   |                                               | 164.0                      |                                                | 163.7               | -                         | 0.3                       |
| 2   | 5.51, s                                       | 88.6                       | 5.49, s                                        | 88.6                | 0.02                      | 0                         |
| 3   |                                               | 170.8                      |                                                | 170.6               | -                         | 0.2                       |
| 4   |                                               | 108.0                      |                                                | 107.7               | -                         | 0.6                       |
| 5   |                                               | 154.5                      |                                                | 154.6               | -                         | -0.1                      |
| 6   | 6.35, d (15.0)                                | 119.0                      | 6.32, d (15.0)                                 | 118.7               | 0.03                      | 0.3                       |
| 7   | 7.18, dd (10.8, 15.0)                         | 136.0                      | 7.19, dd (15.0, 11.0)                          | 136.0               | -0.01                     | 0                         |
| 8   | 6.40, dd (10.8, 15.0)                         | 131.8                      | 6.36, dd (15.0, 10.3)                          | 131.2               | 0.04                      | 0.6                       |
| 9   | 6.57, dd (10.8, 15.6)                         | 139.0                      | 6.50, dd (15.0, 10.3)                          | 138.5               | 0.07                      | 0.5                       |
| 10  | 6.31, dd (10.8, 15.0)                         | 129.9                      | 6.26, dd (15.0, 10.3)                          | 127.3               | 0.05                      | 2.6                       |
| 11  | 7.09, d (15.6)                                | 133.2                      | 6.32, d (15.0)                                 | 140.7               | <b>0.77</b>               | <b>-7.5</b>               |
| 12  |                                               | 132.0                      |                                                | 134.3               | -                         | <b>-2.3</b>               |
| 13  | 5.75, s                                       | 138.7                      | 5.91, s                                        | 141.0               | <b>-0.16</b>              | <b>-2.3</b>               |
| 14  |                                               | 84.5                       |                                                | 84.1                | -                         | 0.4                       |
| 15  | 4.02, s                                       | 86.2                       | 4.00, s                                        | 85.9                | 0.02                      | 0.3                       |
| 16  |                                               | 81.0                       |                                                | 80.8                | -                         | 0.2                       |
| 17  | 3.84, q (6.6)                                 | 77.6                       | 3.83, q (6.6)                                  | 77.6                | 0.01                      | 0                         |
| 18  | 1.20, d (6.6)                                 | 12.3                       | 1.18, d (6.6)                                  | 12.3                | 0.02                      | 0                         |
| 19  | 1.23, s                                       | 17.4                       | 1.21, s                                        | 17.2                | 0.02                      | 0.2                       |
| 20  | 1.40, s                                       | 20.7                       | 1.37, s                                        | 21.3                | 0.03                      | -0.6                      |
| 21  | 1.85, s                                       | 22.6                       | 1.93, s                                        | 13.4                | <b>-0.08</b>              | <b>9.2</b>                |
| 22  | 1.96, s                                       | 8.9                        | 1.93, s                                        | 8.8                 | 0.03                      | 0.1                       |
| OMe | 3.83, s                                       | 56.3                       | 3.83, s                                        | 56.1                | 0                         | 0.2                       |

<sup>a</sup> The NMR data were cited from ref. 1.

## References

- Asai, T.; Luo, D.; Yamashita, K.; Oshima, Y. *Org. Lett.* 2013, 15, 1020-1023

LJ-F46-3\_180416115649 #46 RT: 0.39 AV: 1 NL: 3.65E7  
T: FTMS + c ESI Full ms [60.00-700.00]

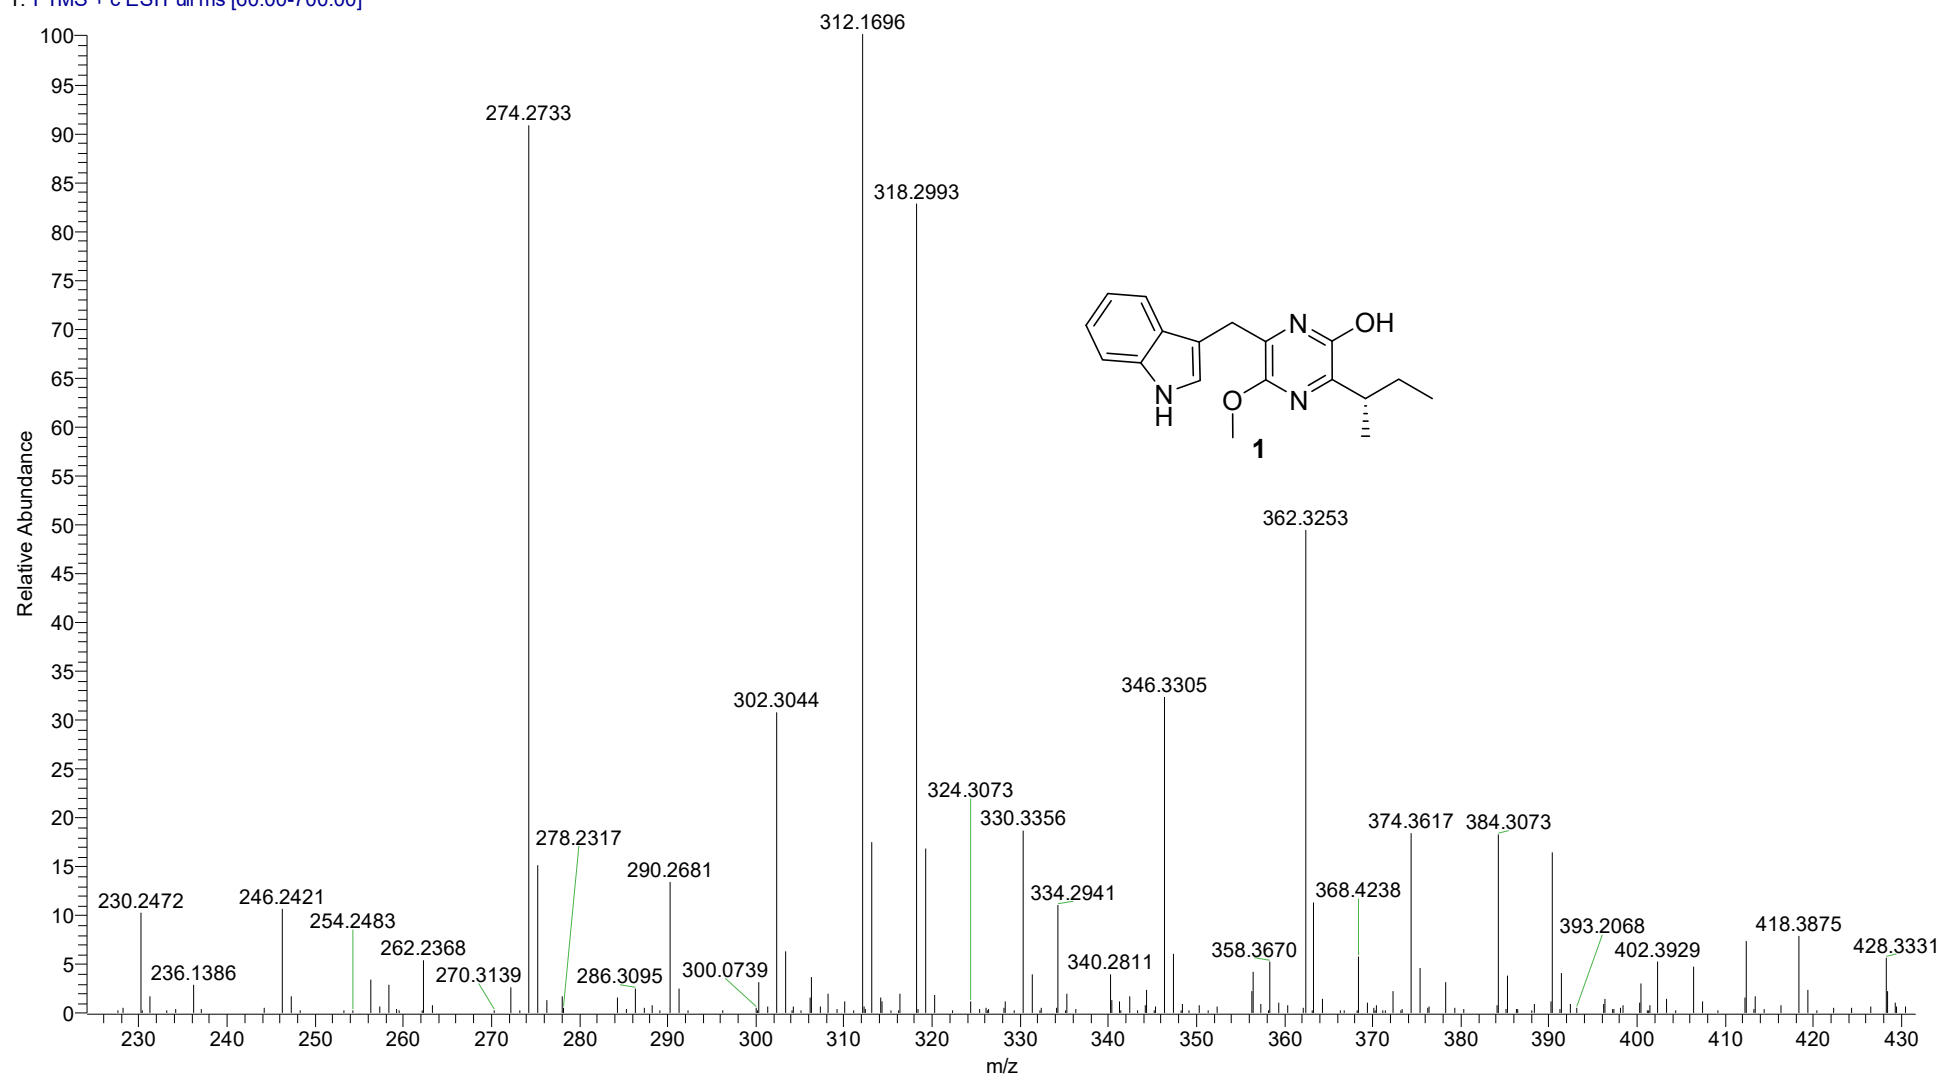

Figure S1. The (+)-HRESIMS spectrum of tryptilepyrazinol (1).

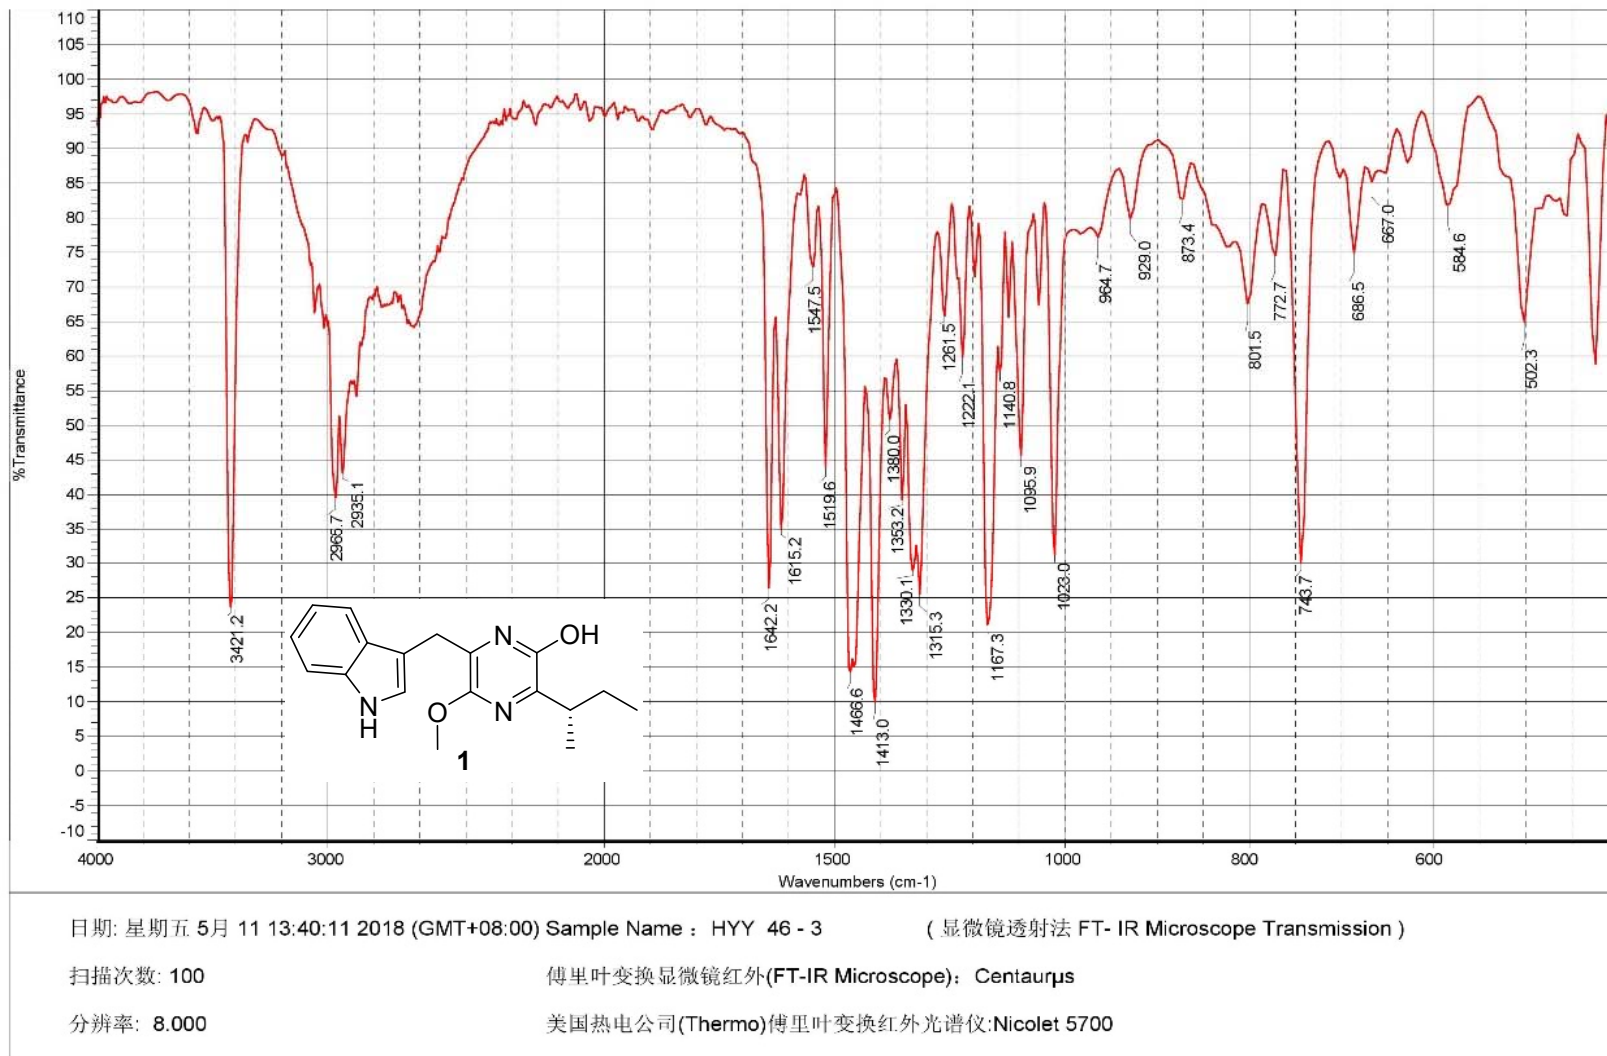

Figure S2. The IR spectrum of tryptlepyrazinol (1).

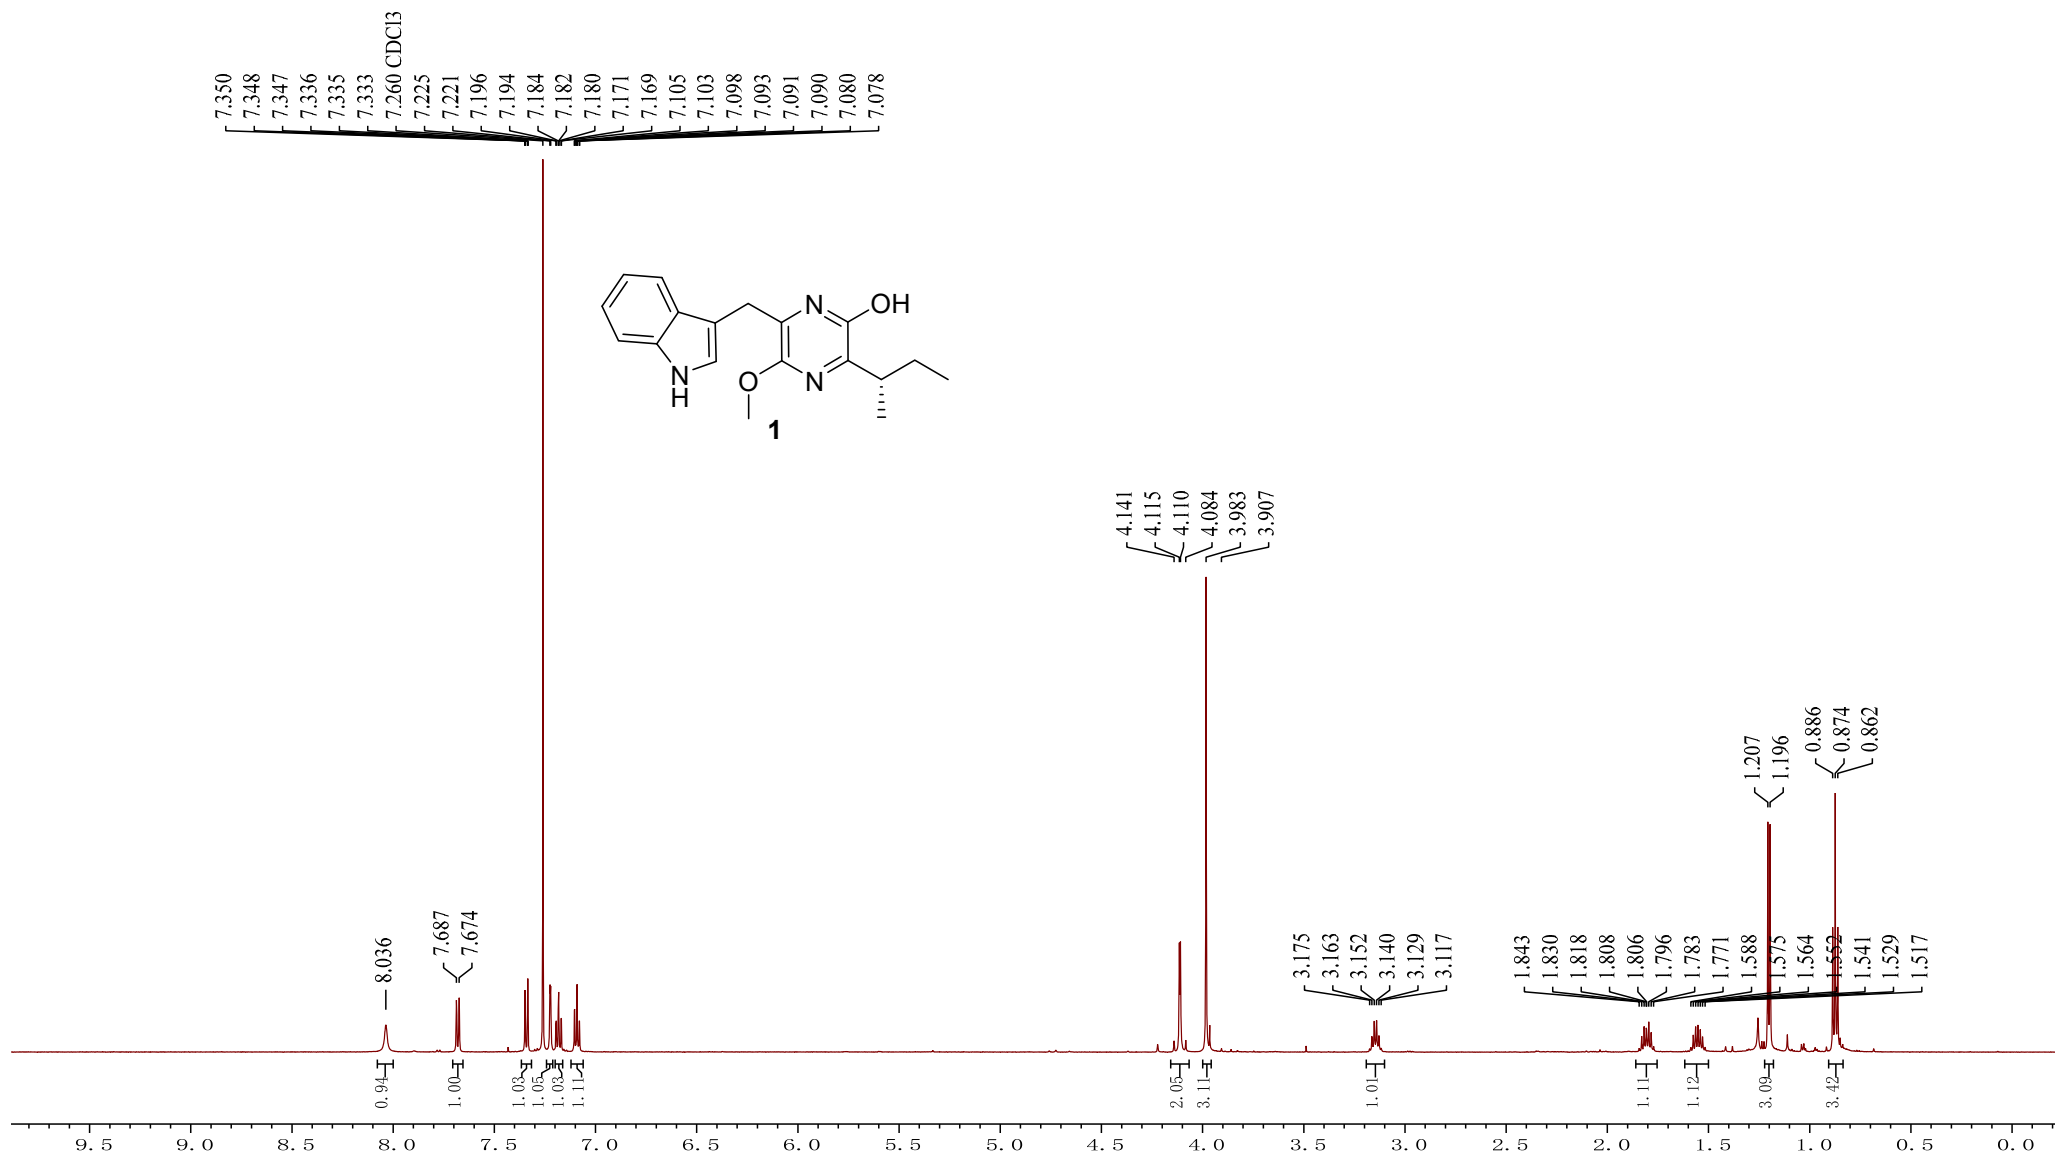

Figure S3. The <sup>1</sup>H NMR spectrum of tryptlepyrazinol (**1**) in CDCl<sub>3</sub> (600 MHz).



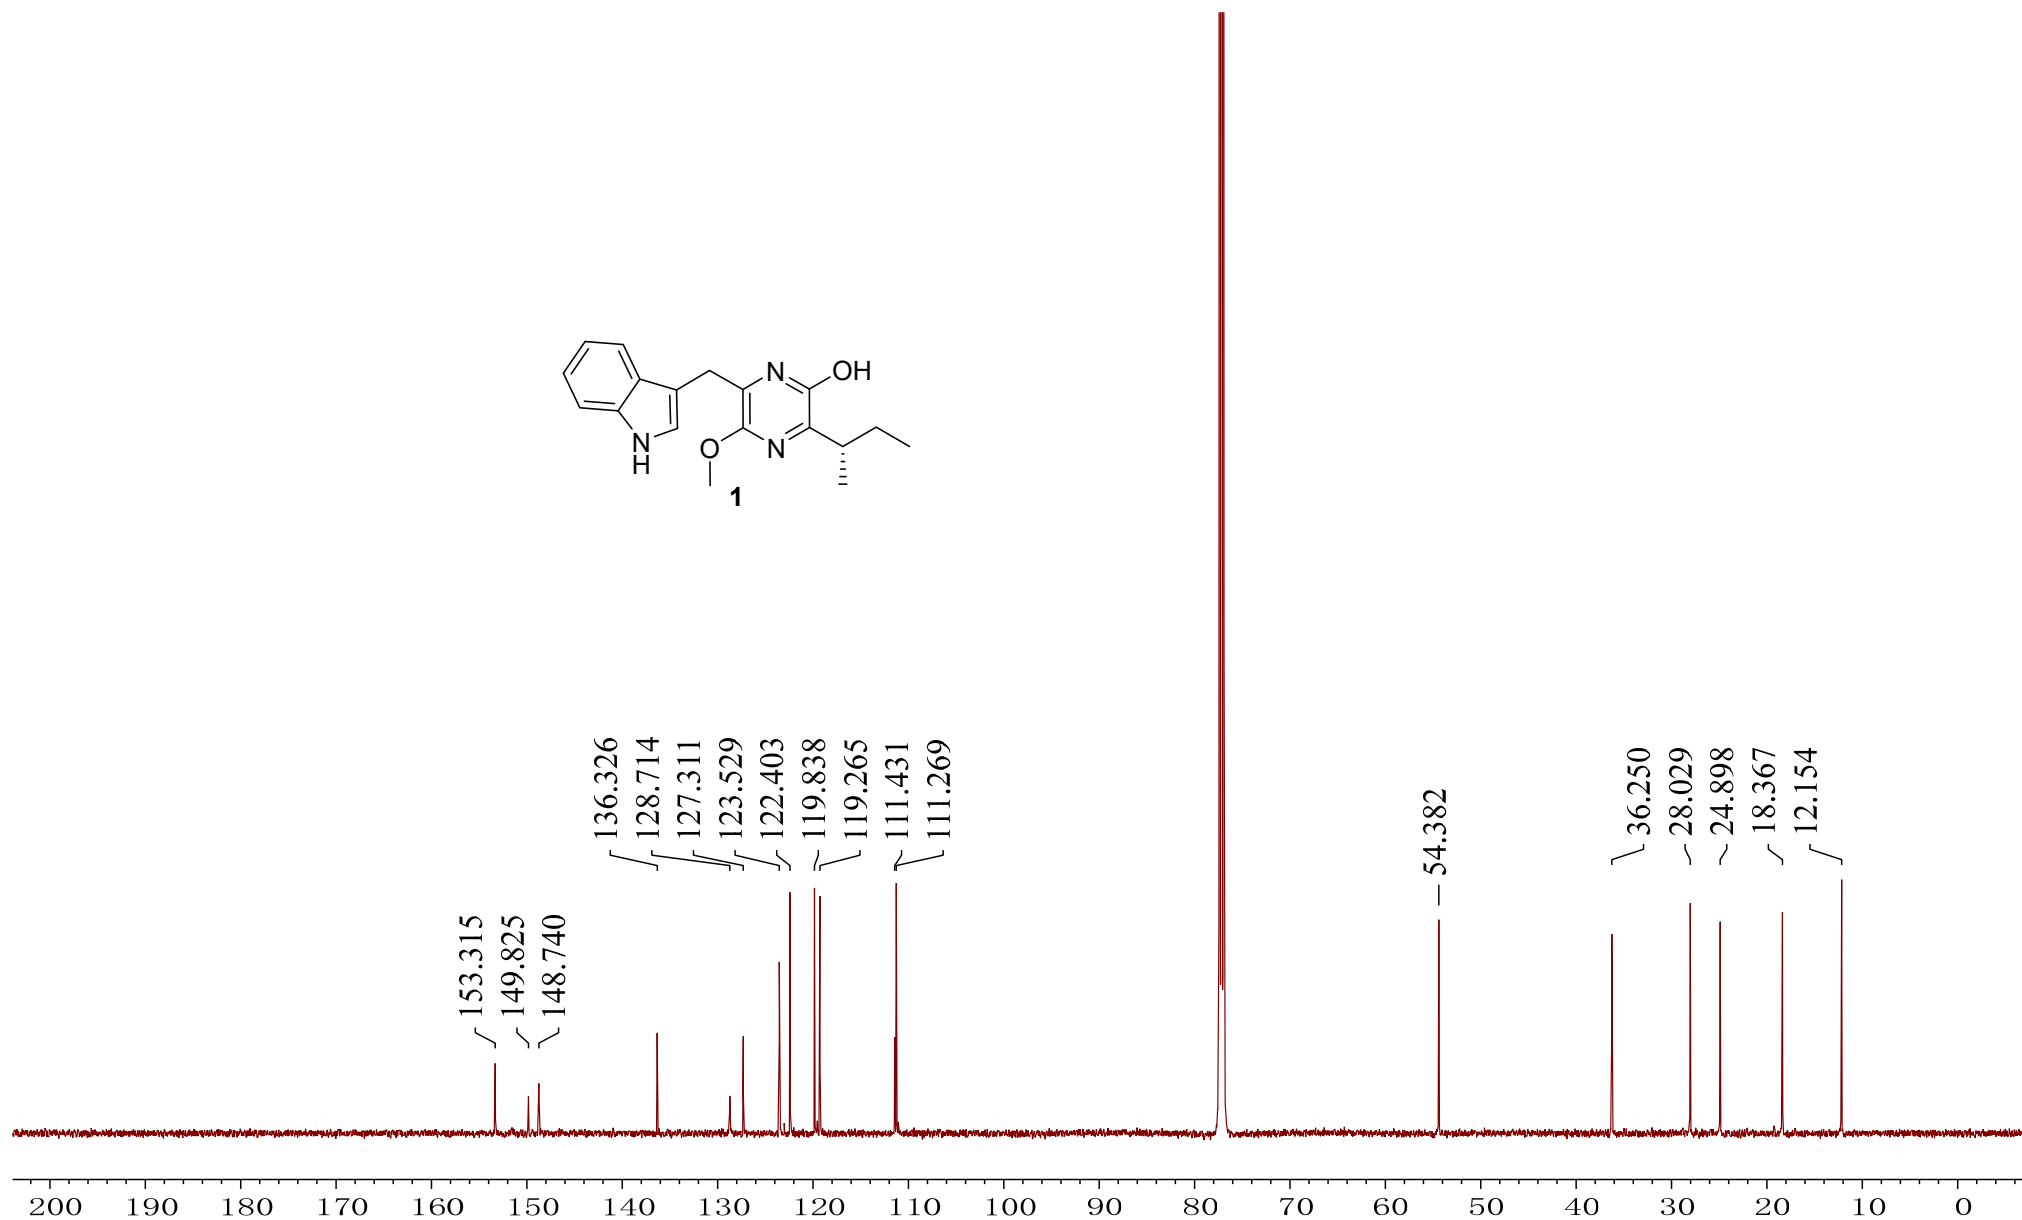

**Figure S4.** The <sup>13</sup>C NMR spectrum of trypilepyrazinol (**1**) in CDCl<sub>3</sub> (150 MHz)

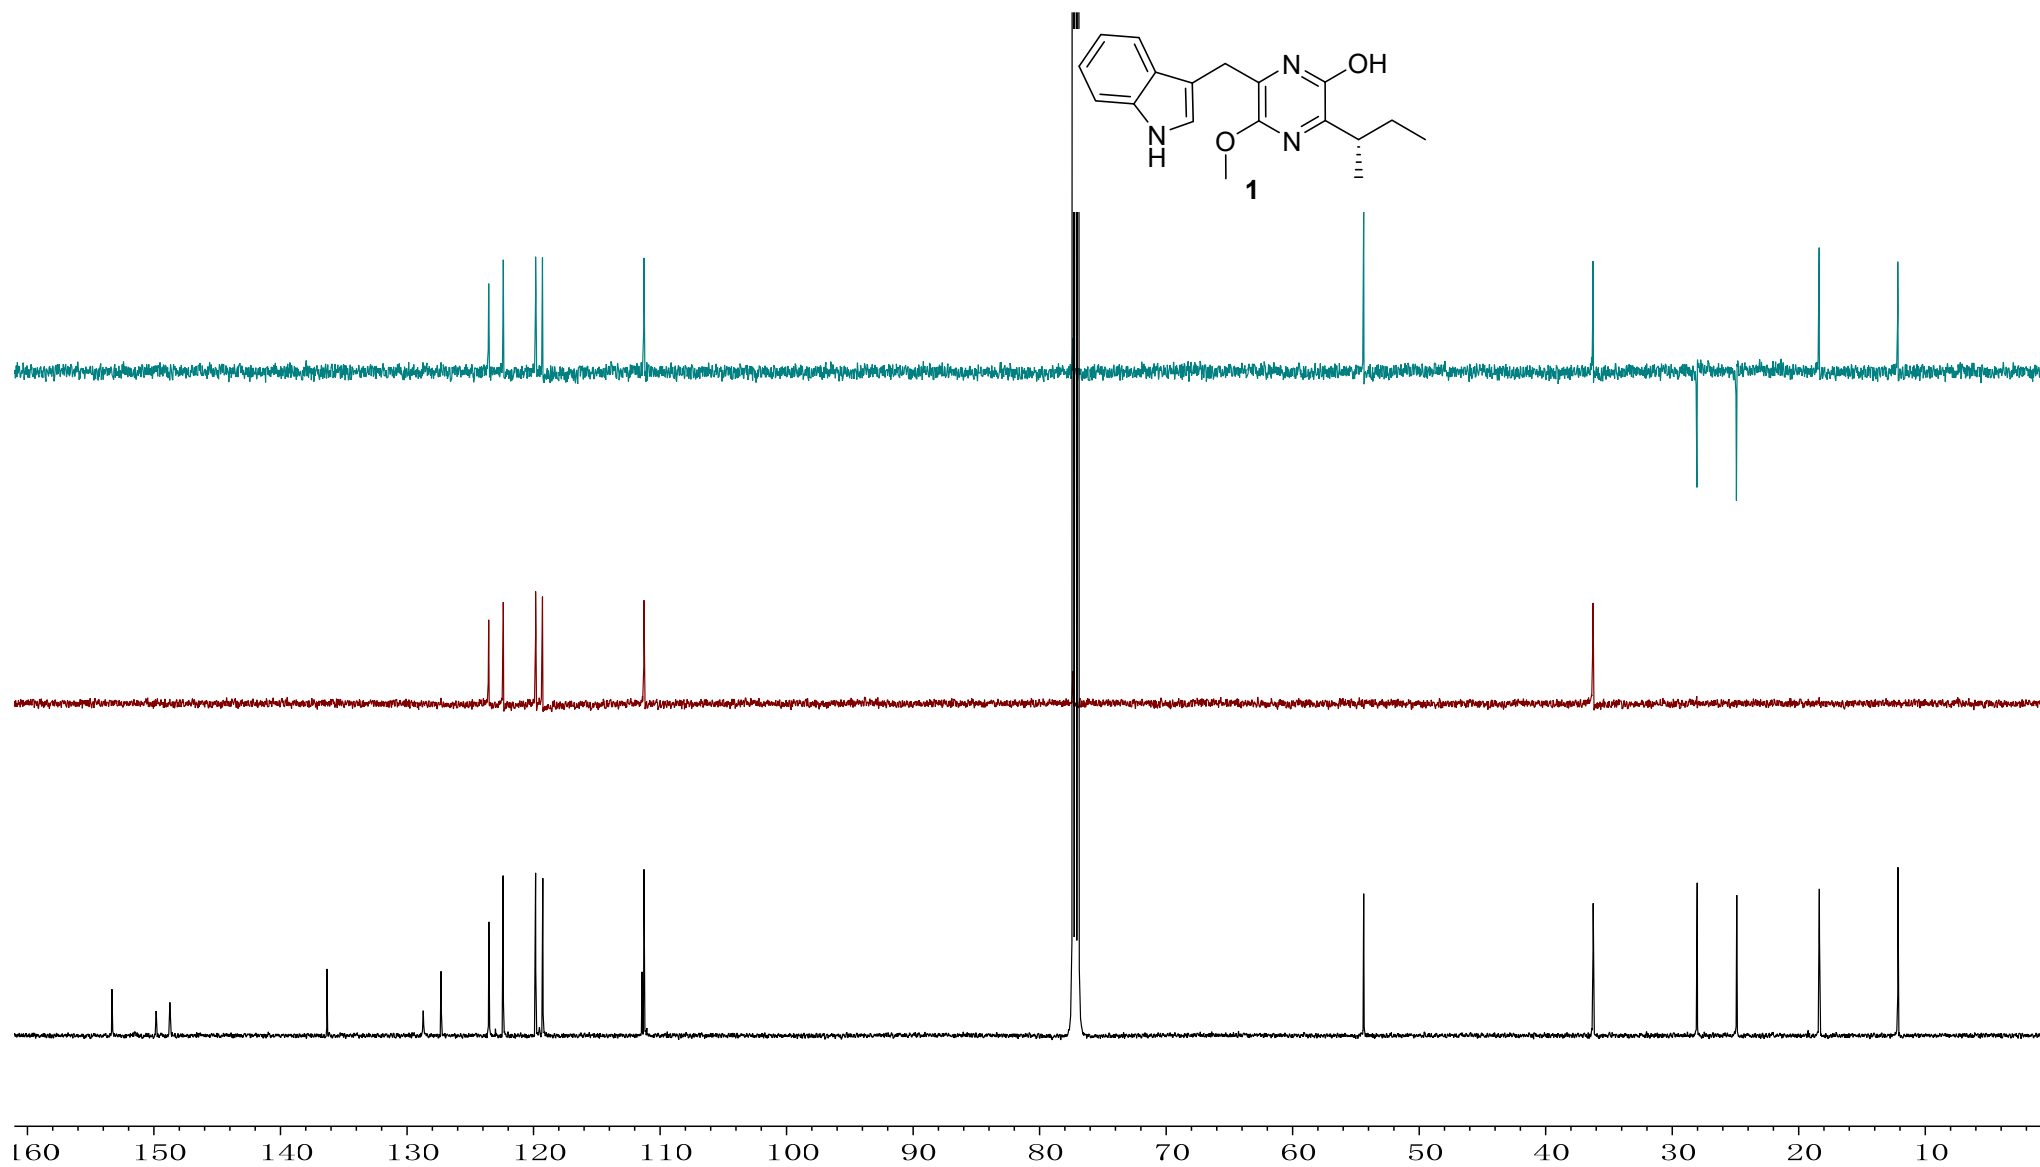

Figure S5. The DEPT spectrum of tryptilepyrazinol (1) in CDCl<sub>3</sub> (150 MHz).

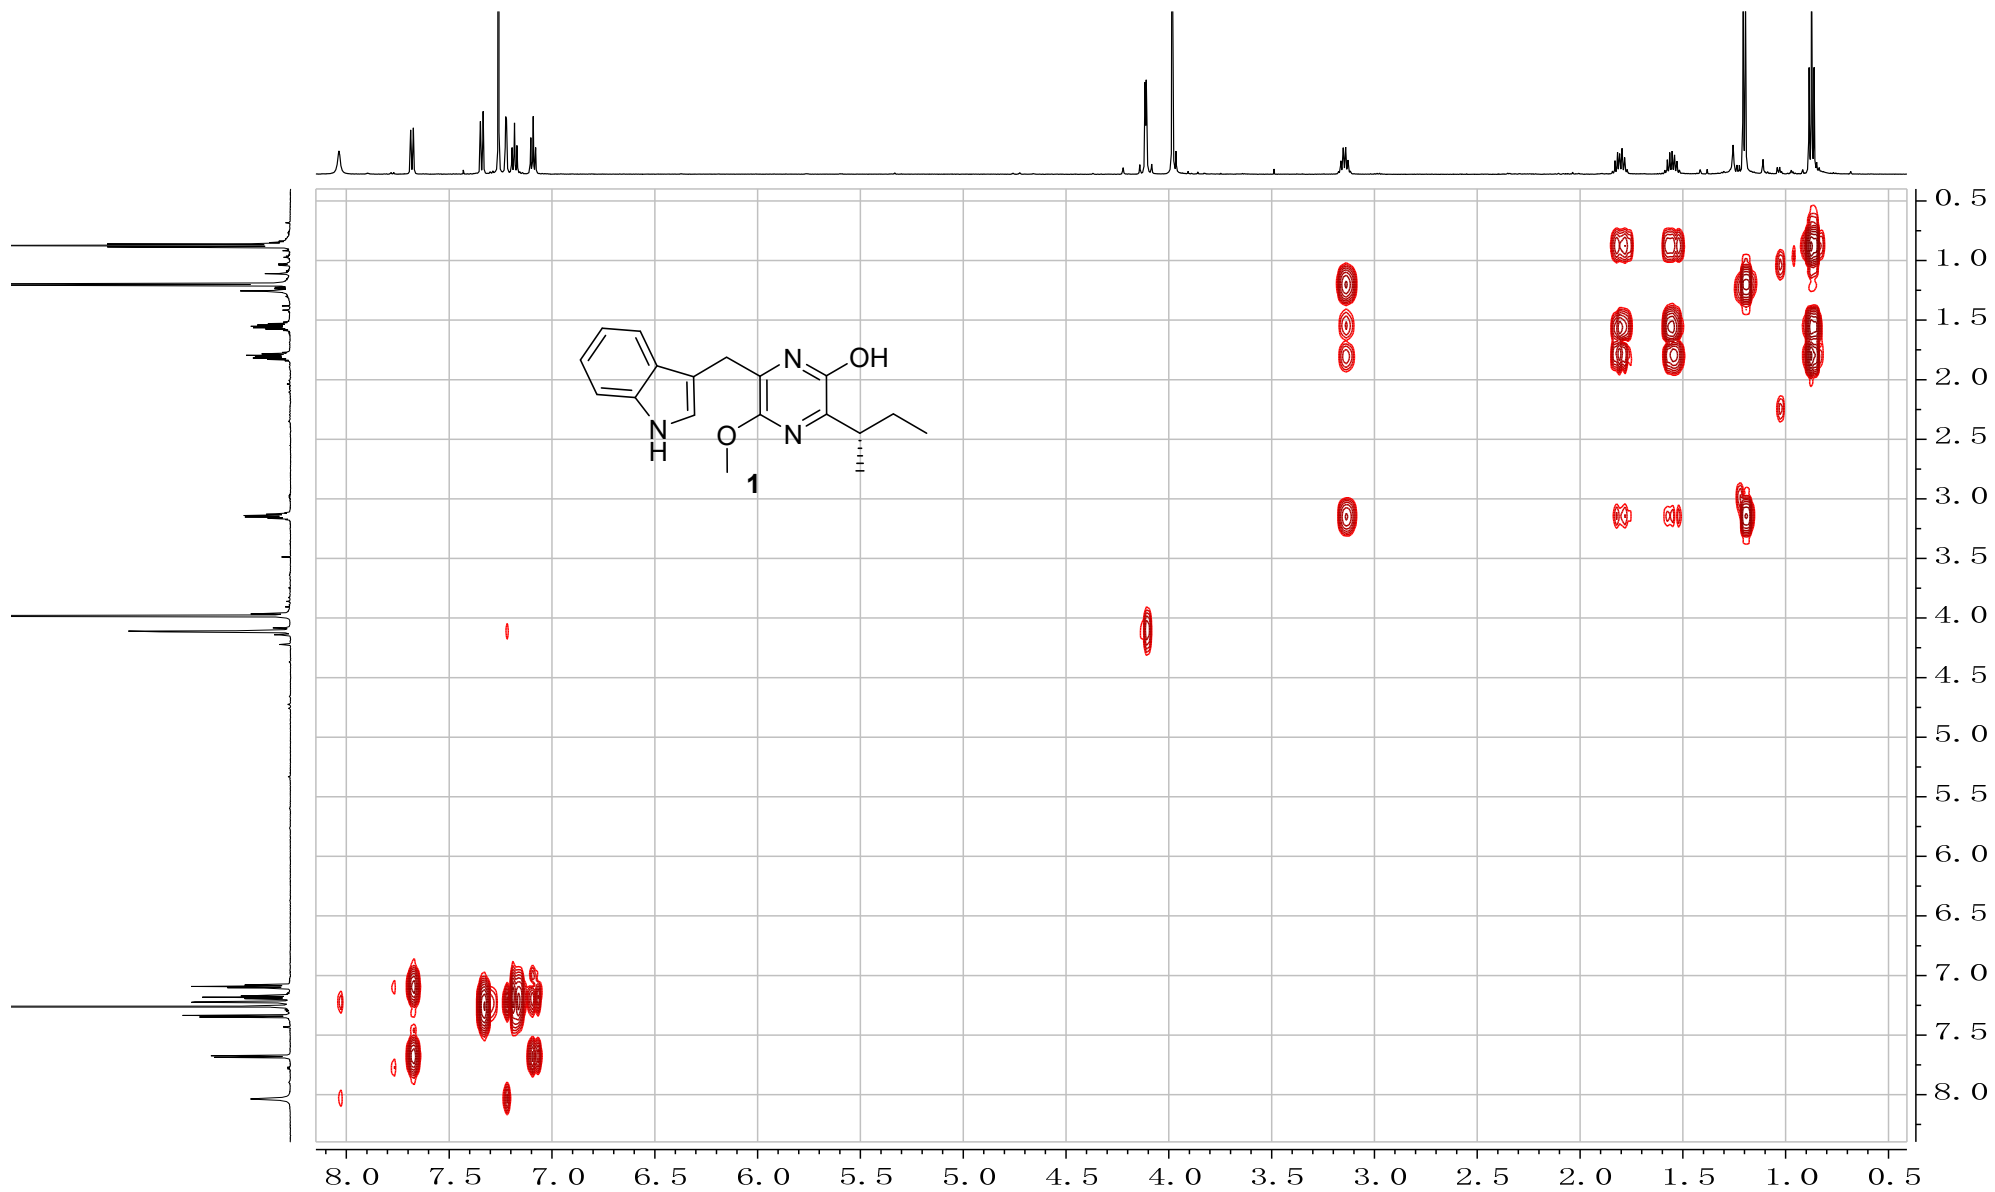

**Figure S6.** The  $^1\text{H}$ - $^1\text{H}$  COSY spectrum of trypilepyrazinol (1) in  $\text{CDCl}_3$  (600 MHz).

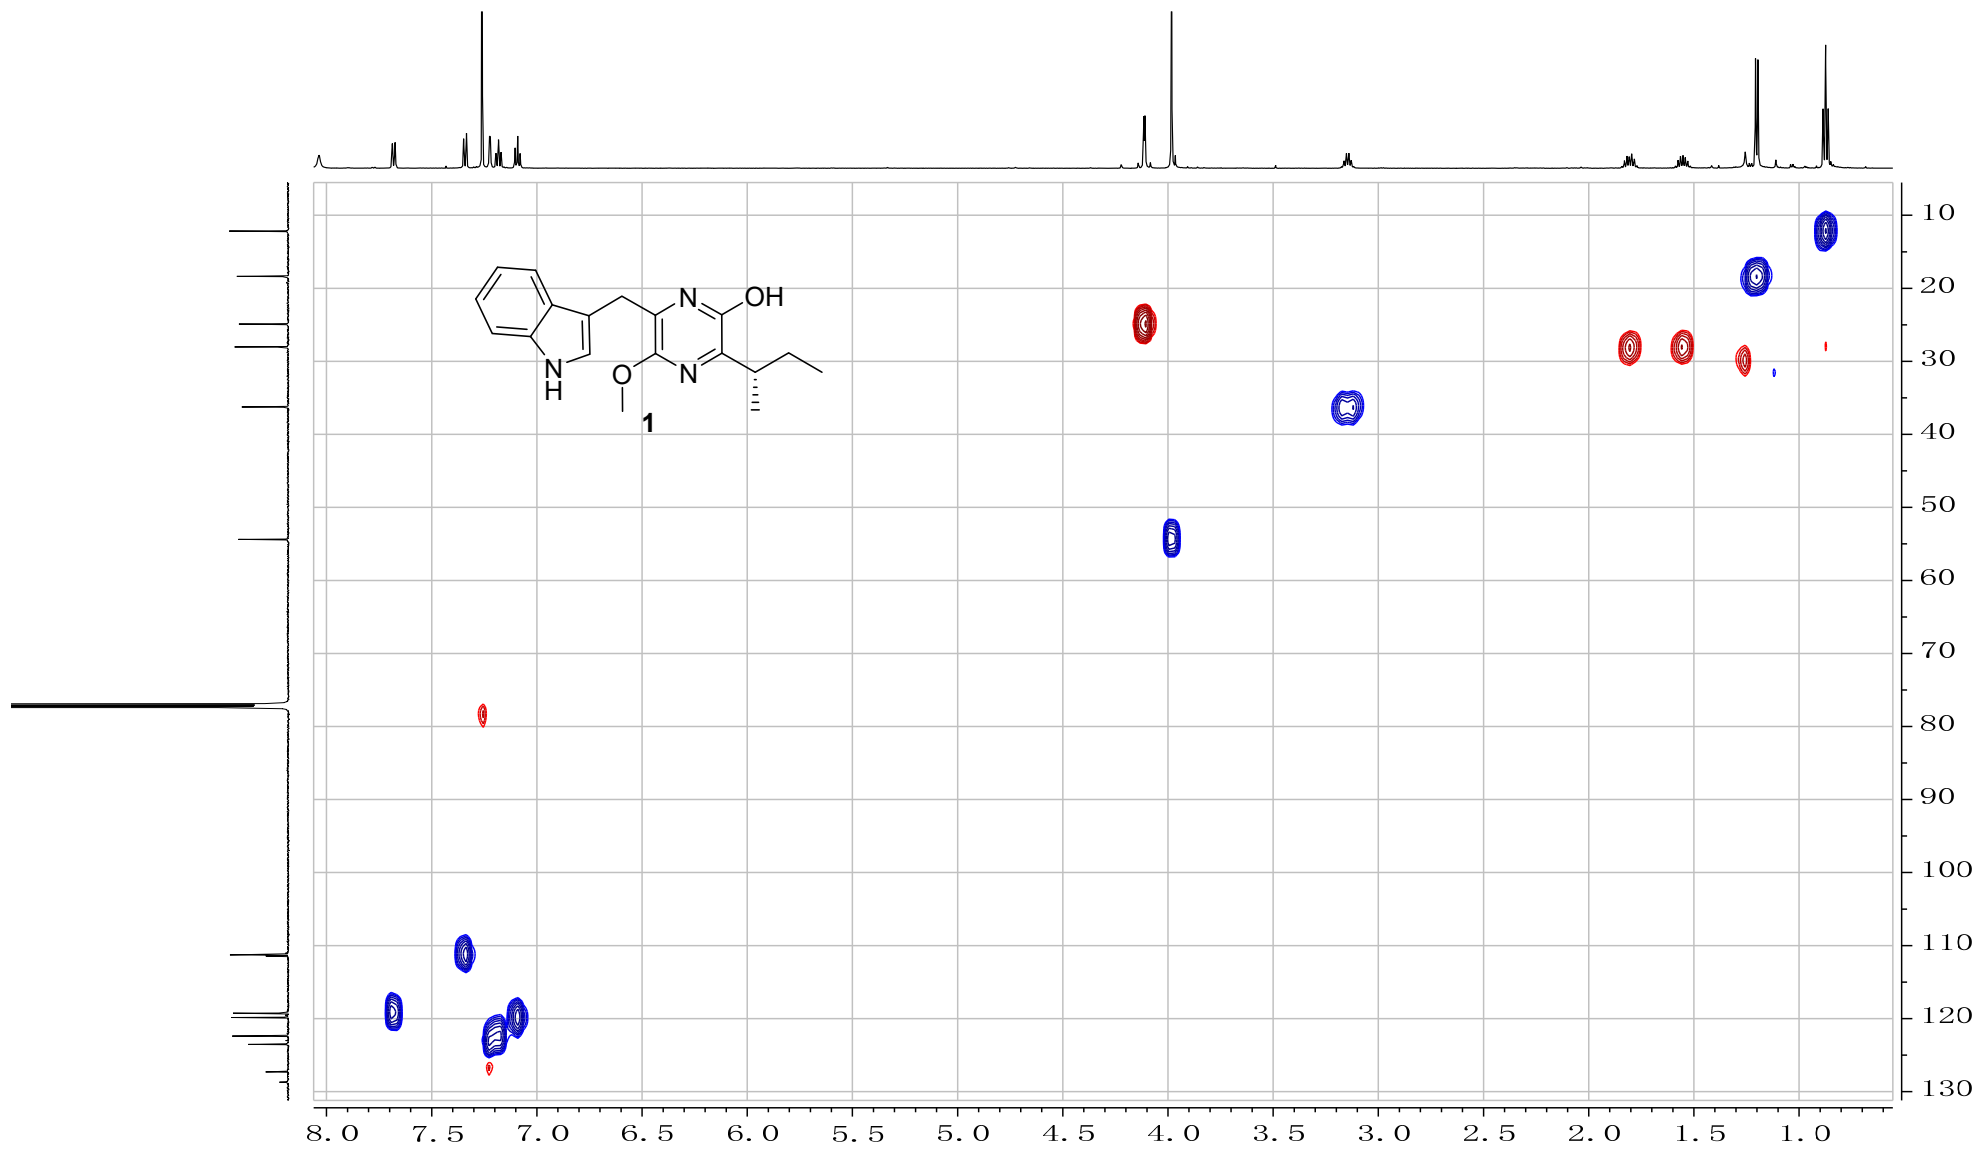

**Figure S7.** The HSQC spectrum of tryptlepyrazinol (**1**) in CDCl<sub>3</sub> (600 MHz).

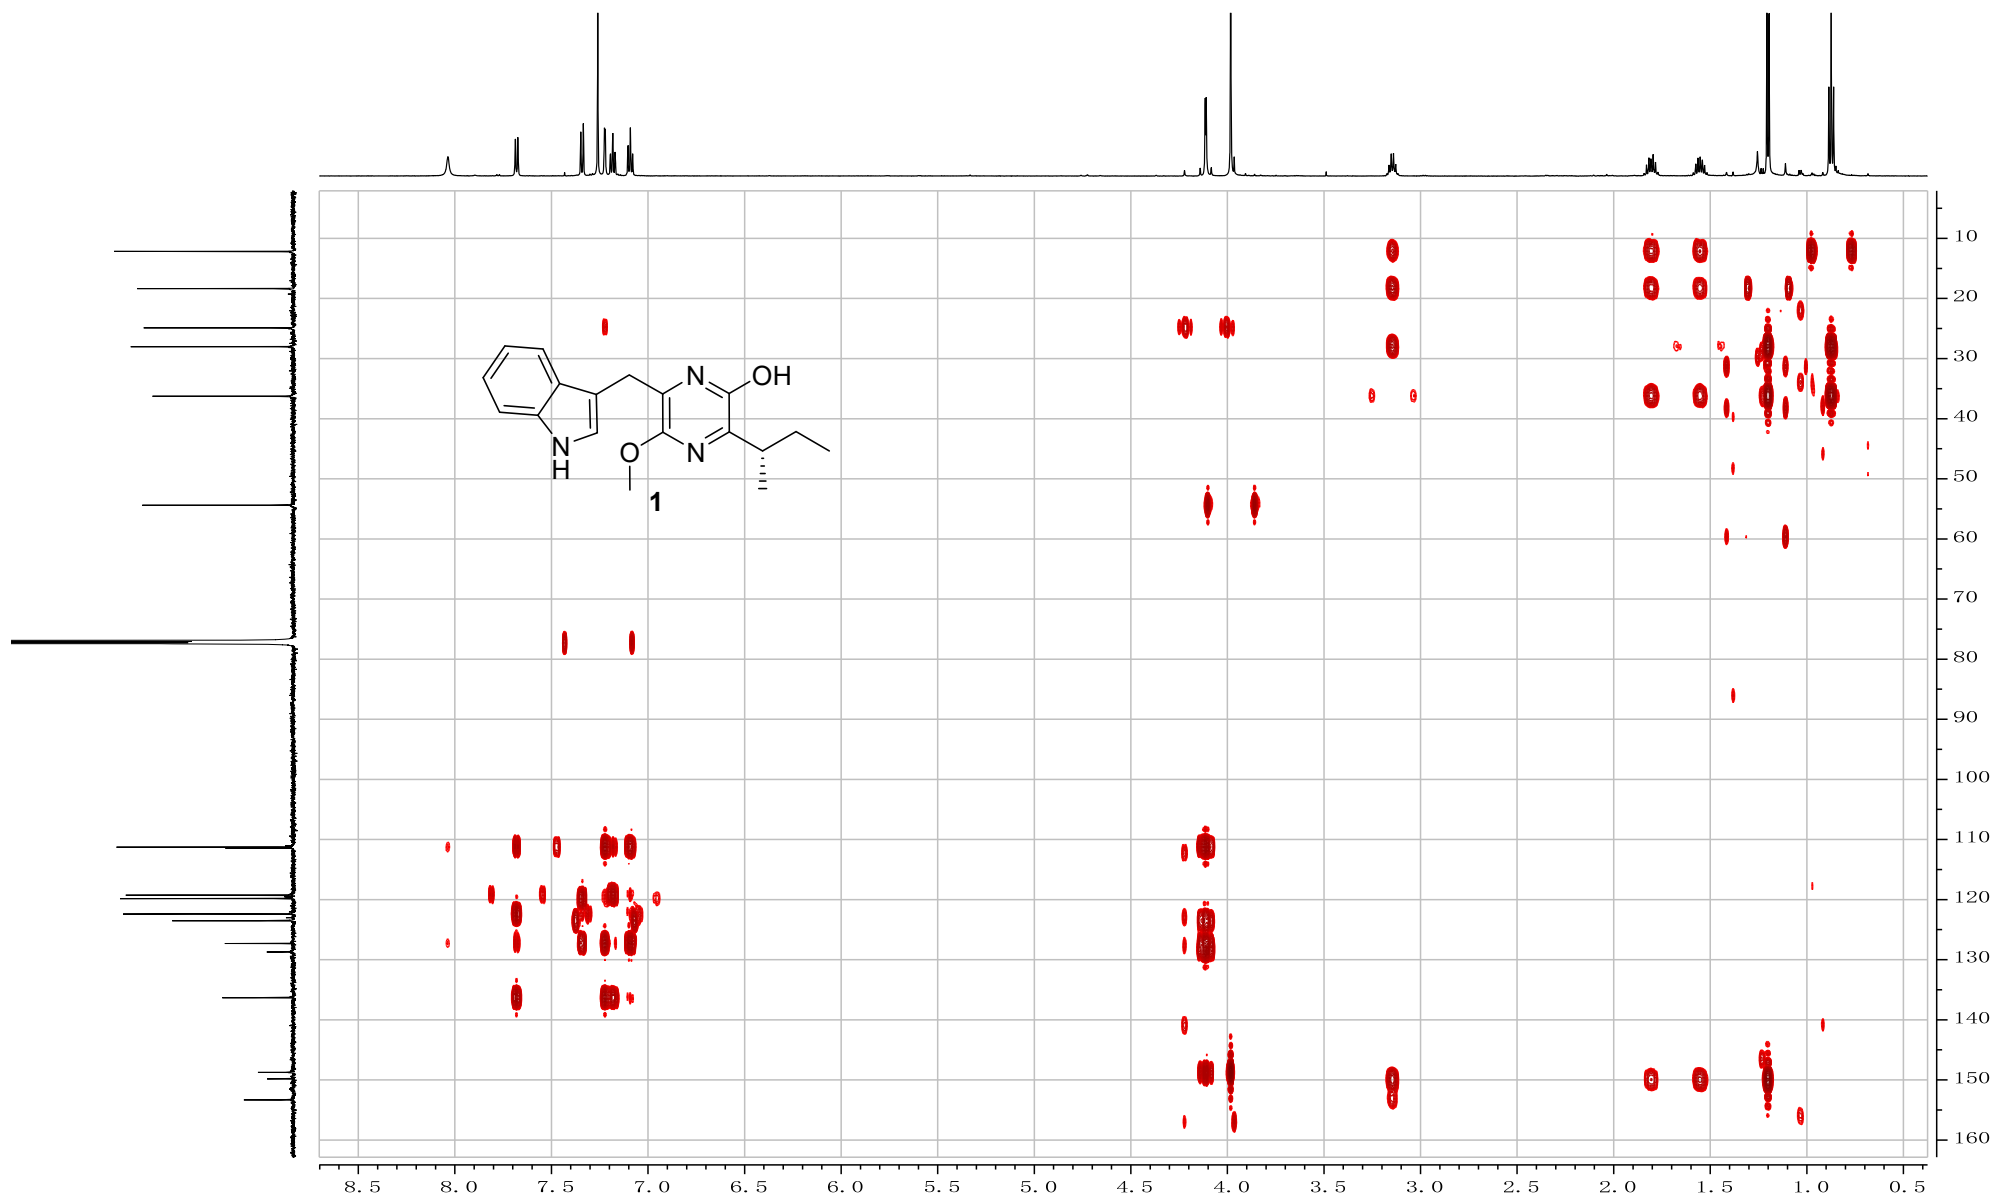

**Figure S8.** The HMBC spectrum of trypilepyrazinol (**1**) in CDCl<sub>3</sub> (600 MHz).

F46\_1 #30 RT: 0.48 AV: 1 NL: 2.65E7  
T: FTMS + c ESI Full ms [100.00-1100.00]

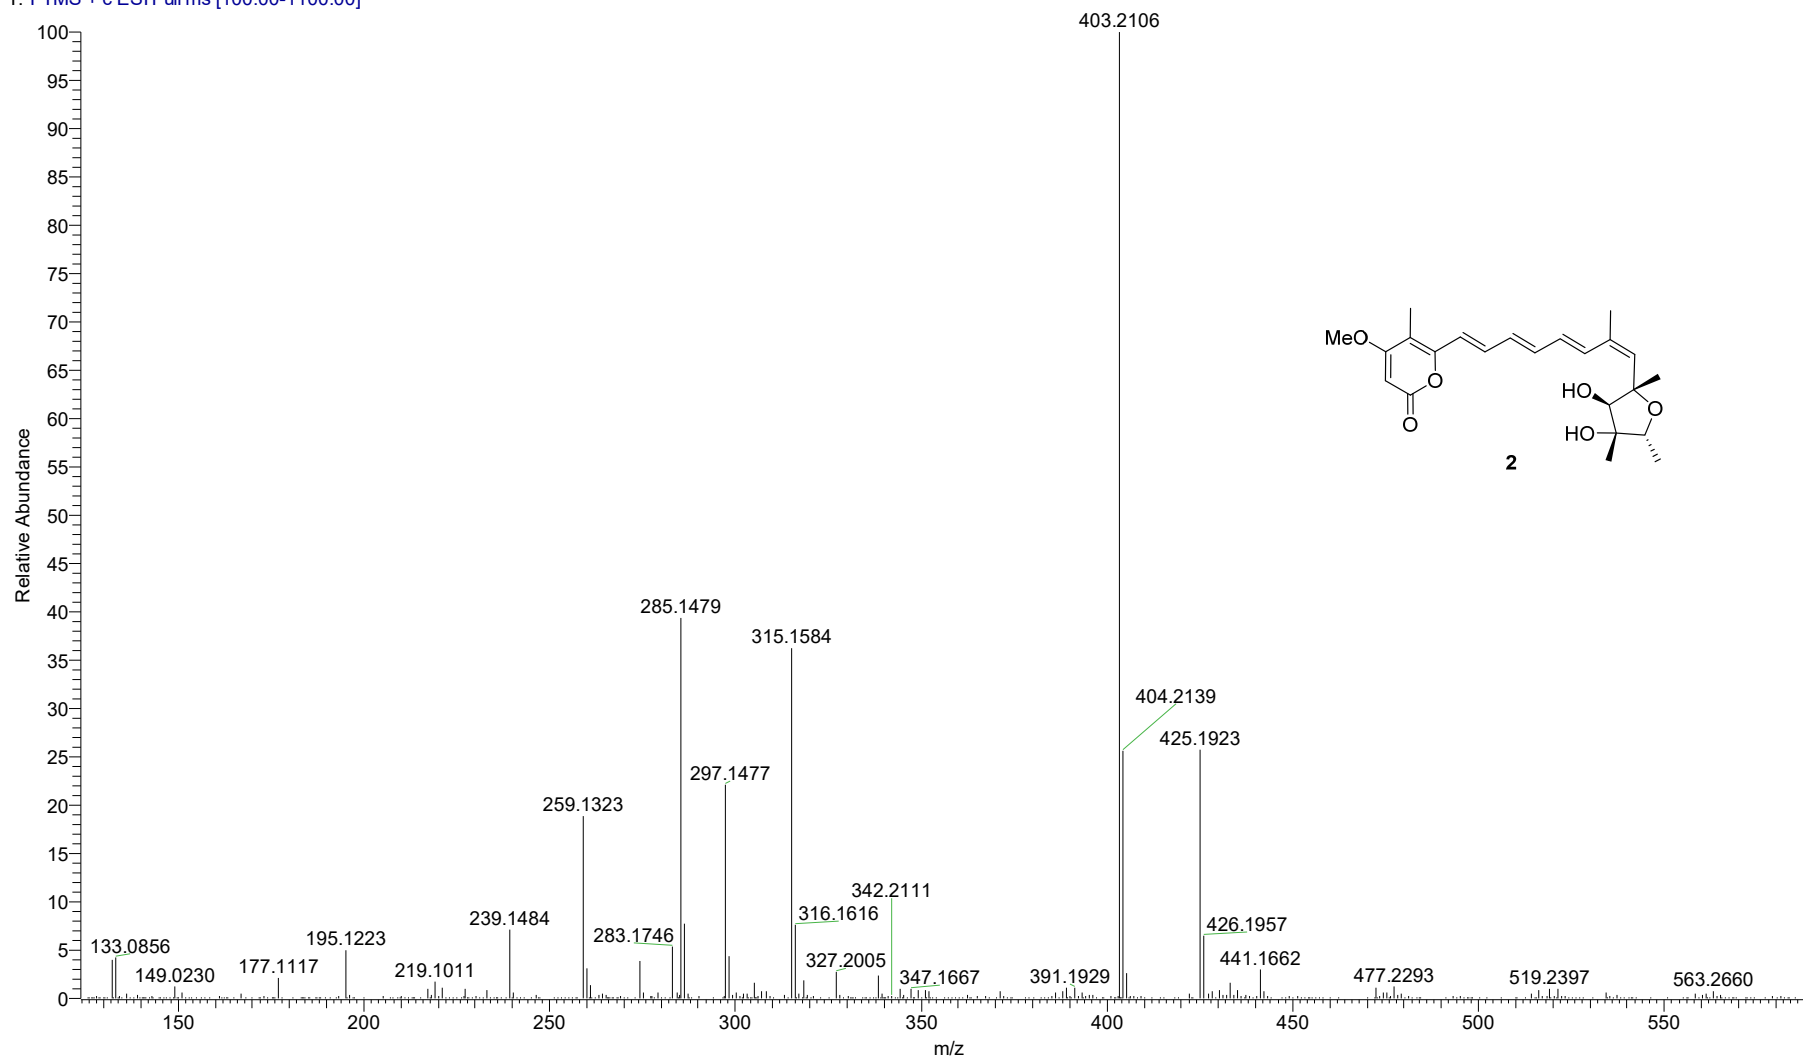

Figure S9. The (+)-HRESIMS spectrum of (+)-neocitreoviridin (2).

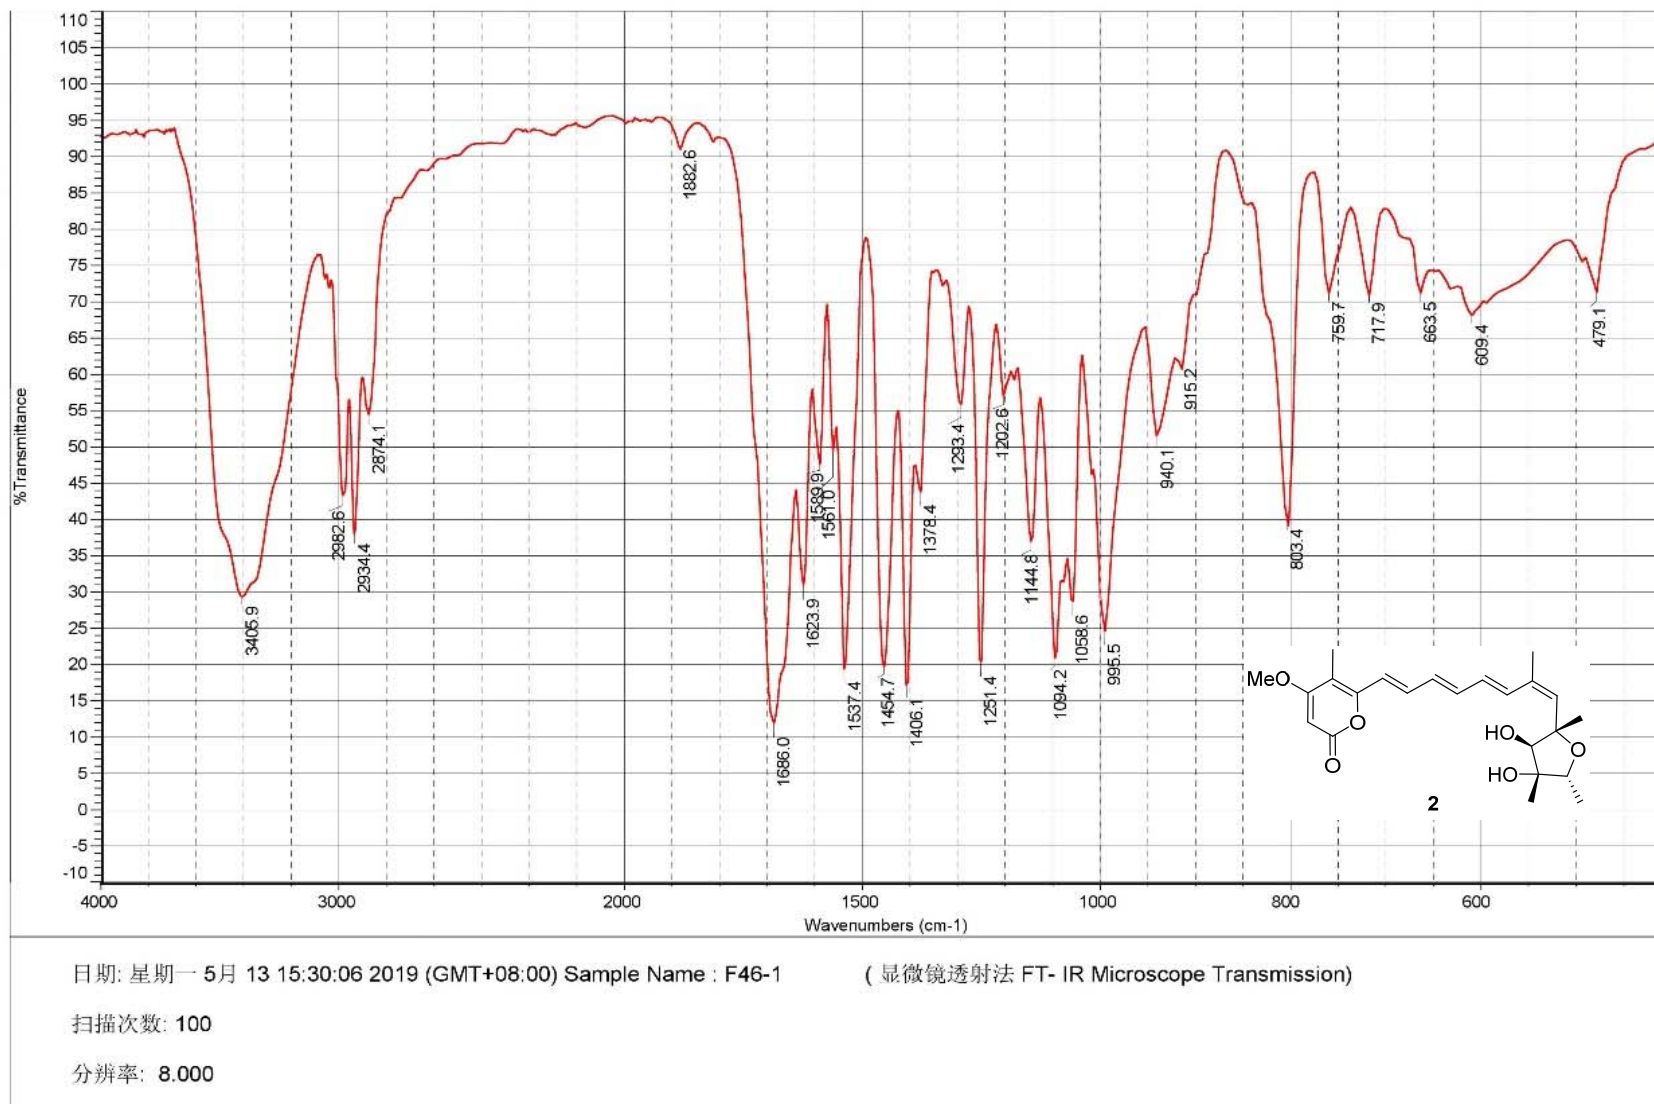

Figure S10. The IR spectrum of (+)-neocitreoviridin (2).

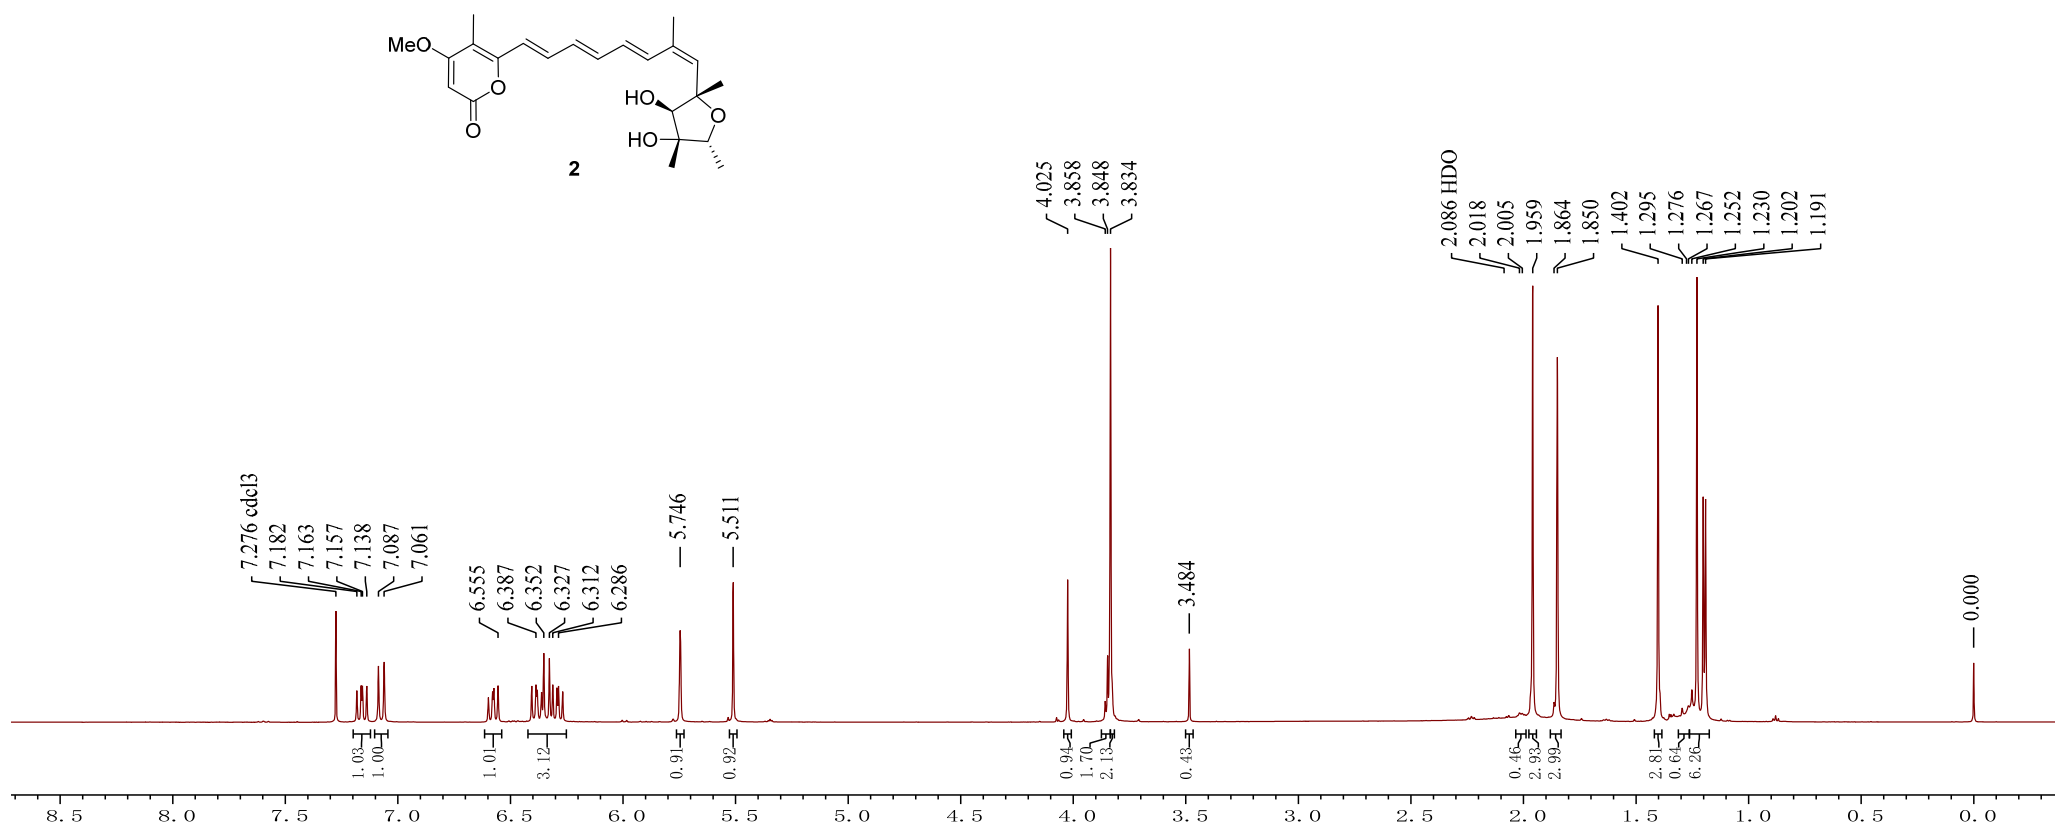

**Figure S11.** The  $^1\text{H}$  NMR spectrum of (+)-neocitreoviridin (**2**) in  $\text{CDCl}_3$  (600 MHz).



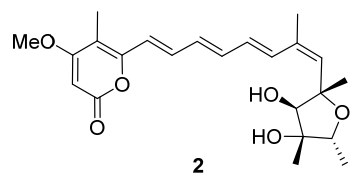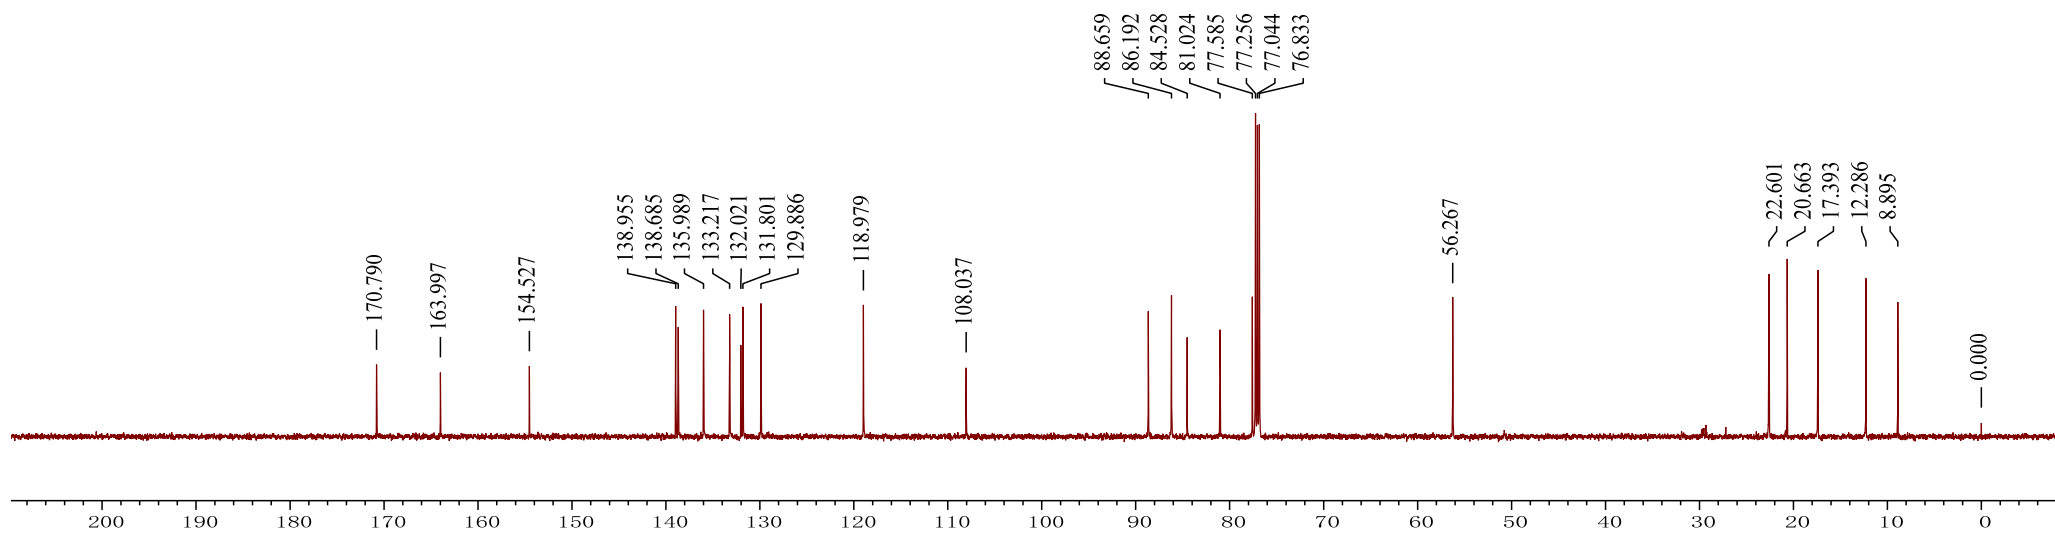

**Figure S12.** The  $^{13}\text{C}$  NMR spectrum of (+)-neocitreoviridin (**2**) in  $\text{CDCl}_3$  (150 MHz).

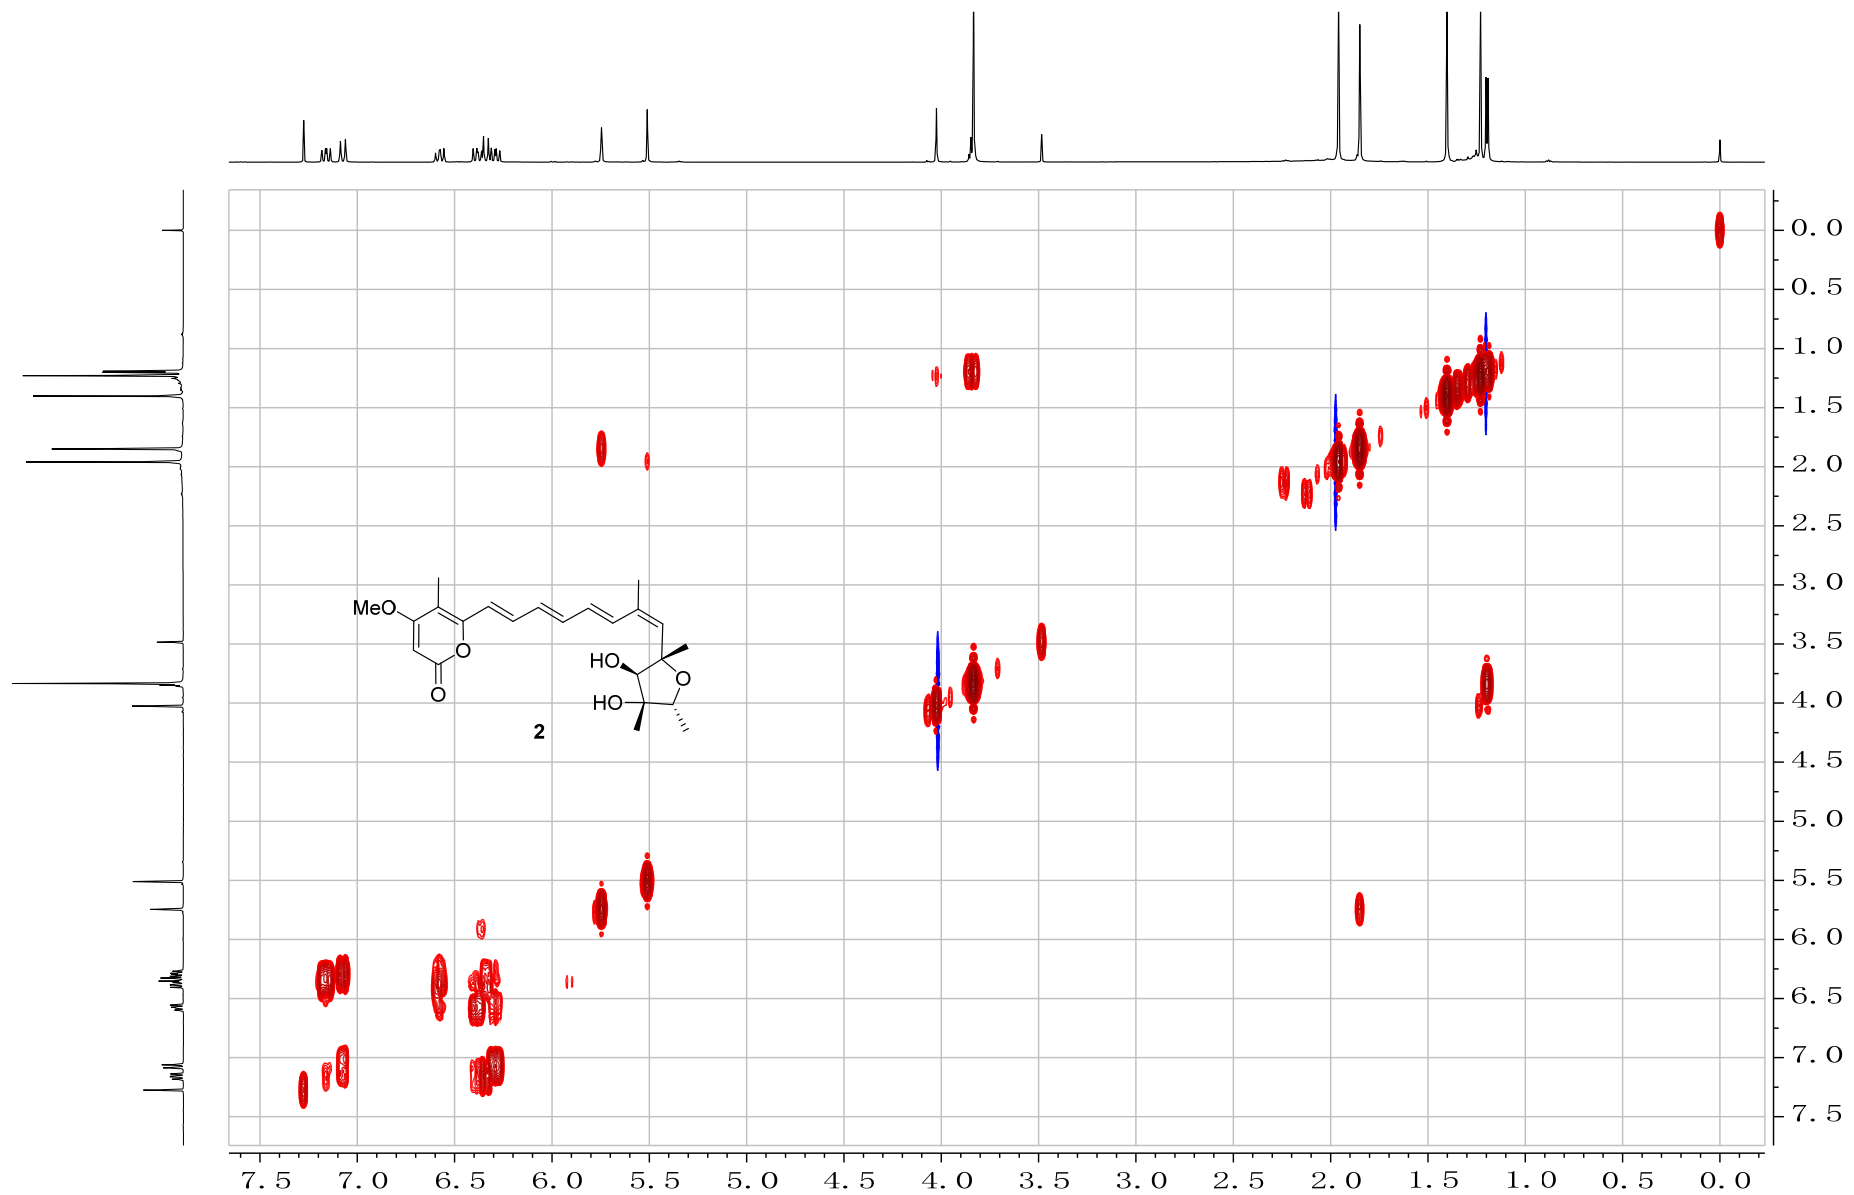

**Figure S13.** The  $^1\text{H}$ - $^1\text{H}$  COSY spectrum of (+)-neocitreoviridin (**2**) in  $\text{CDCl}_3$  (600 MHz)

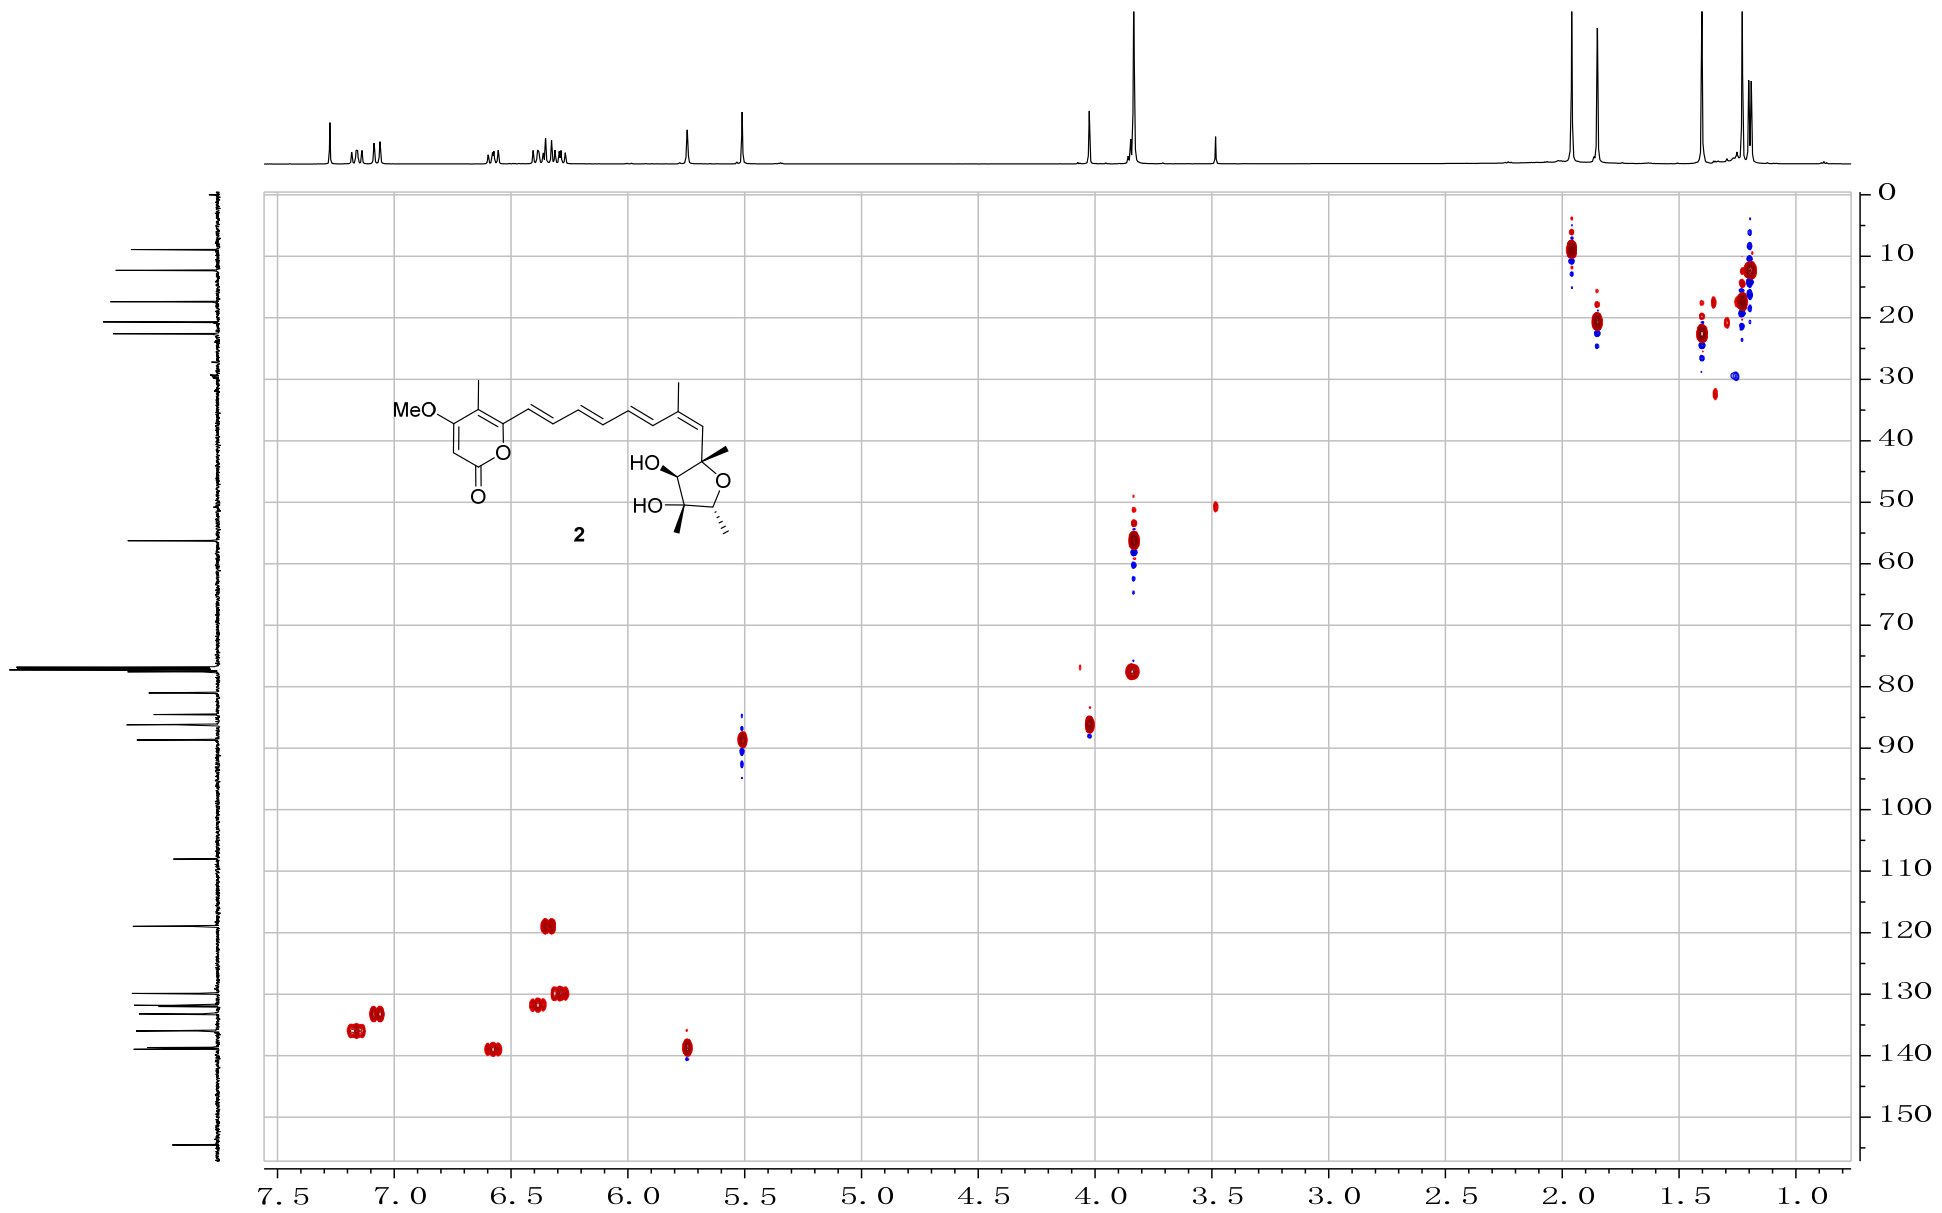

**Figure S14.** The HSQC spectrum of (+)-neocitreoviridin (**2**) in CDCl<sub>3</sub> (600 MHz).

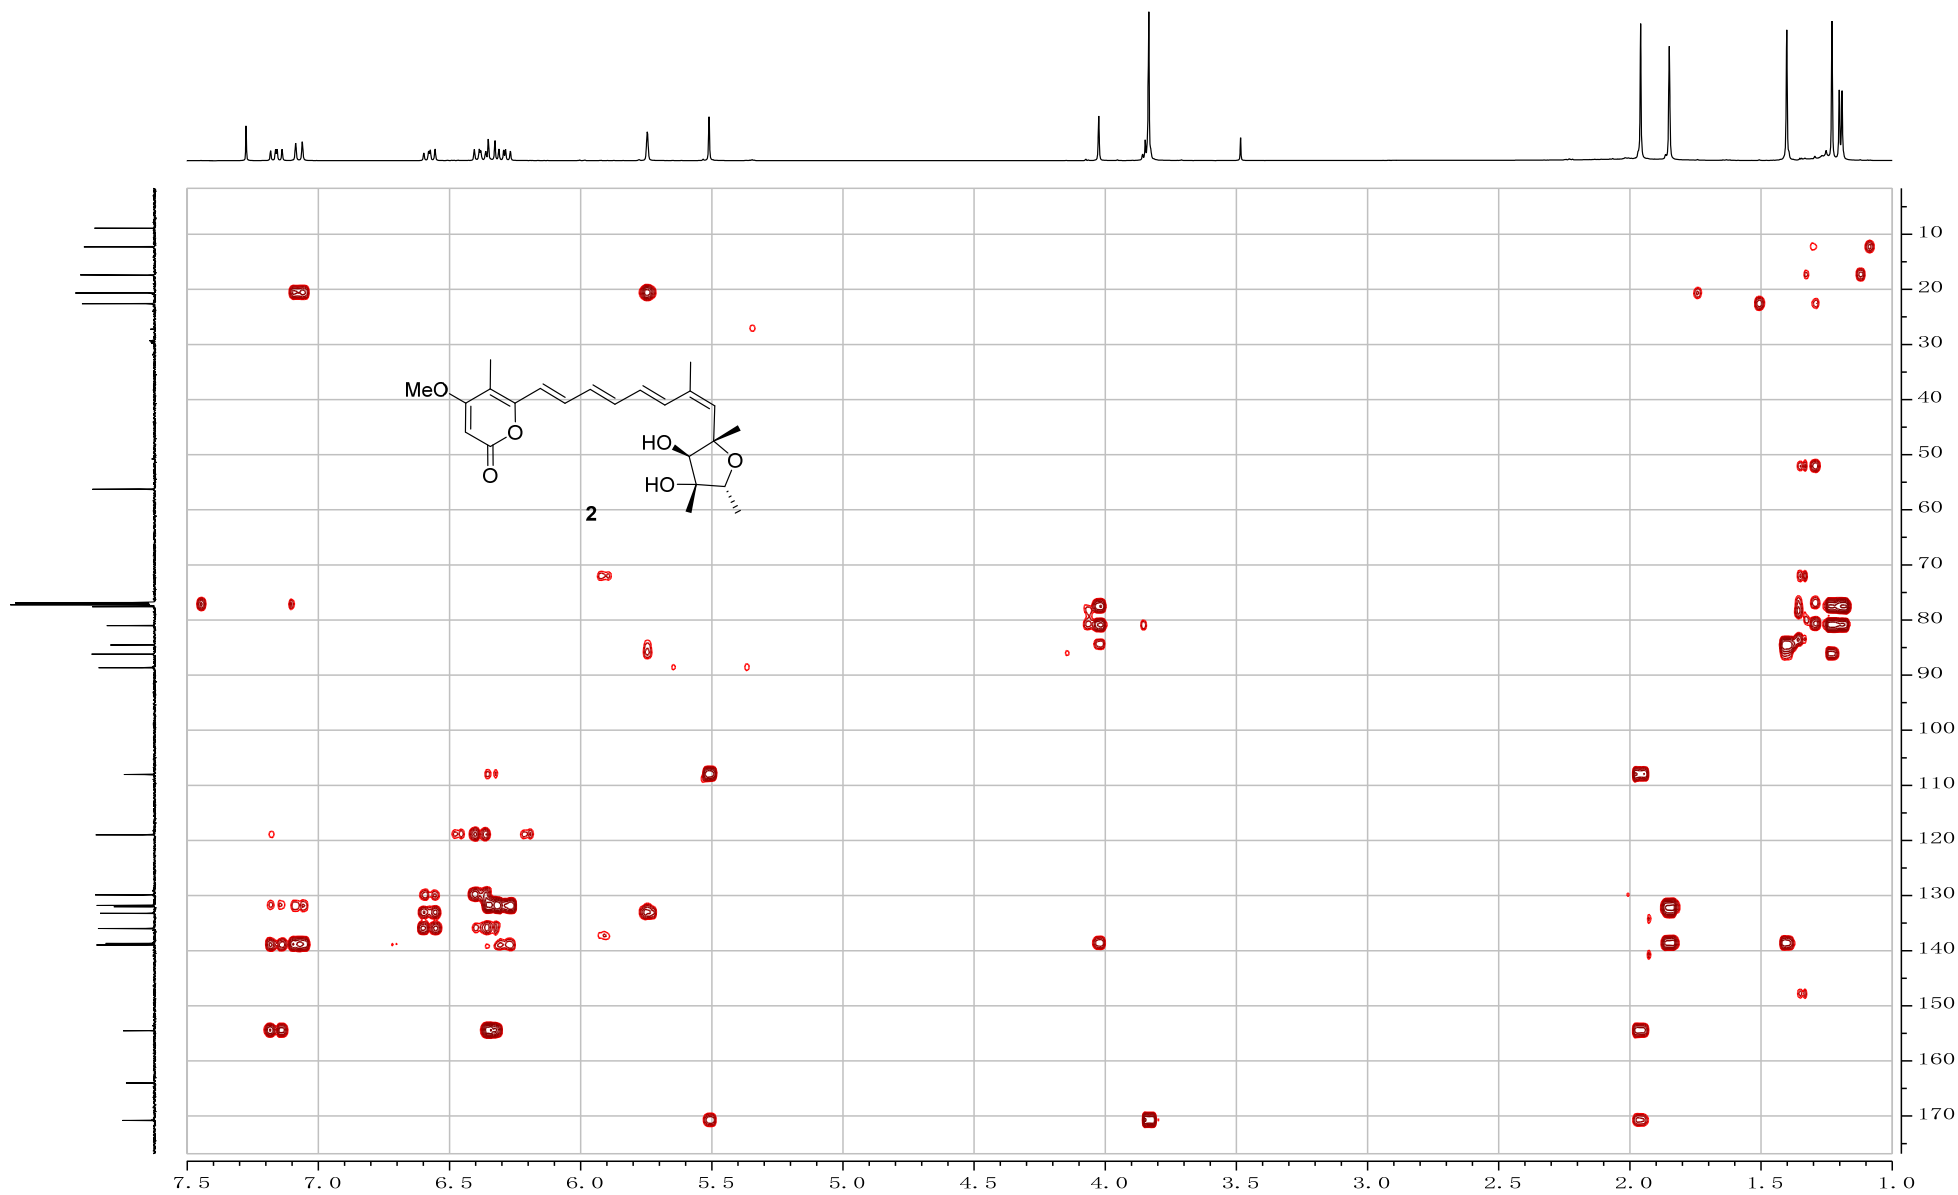

**Figure S15.** The HMBC spectrum of (+)-neocitreoviridin (**2**) in CDCl<sub>3</sub> (600 MHz).

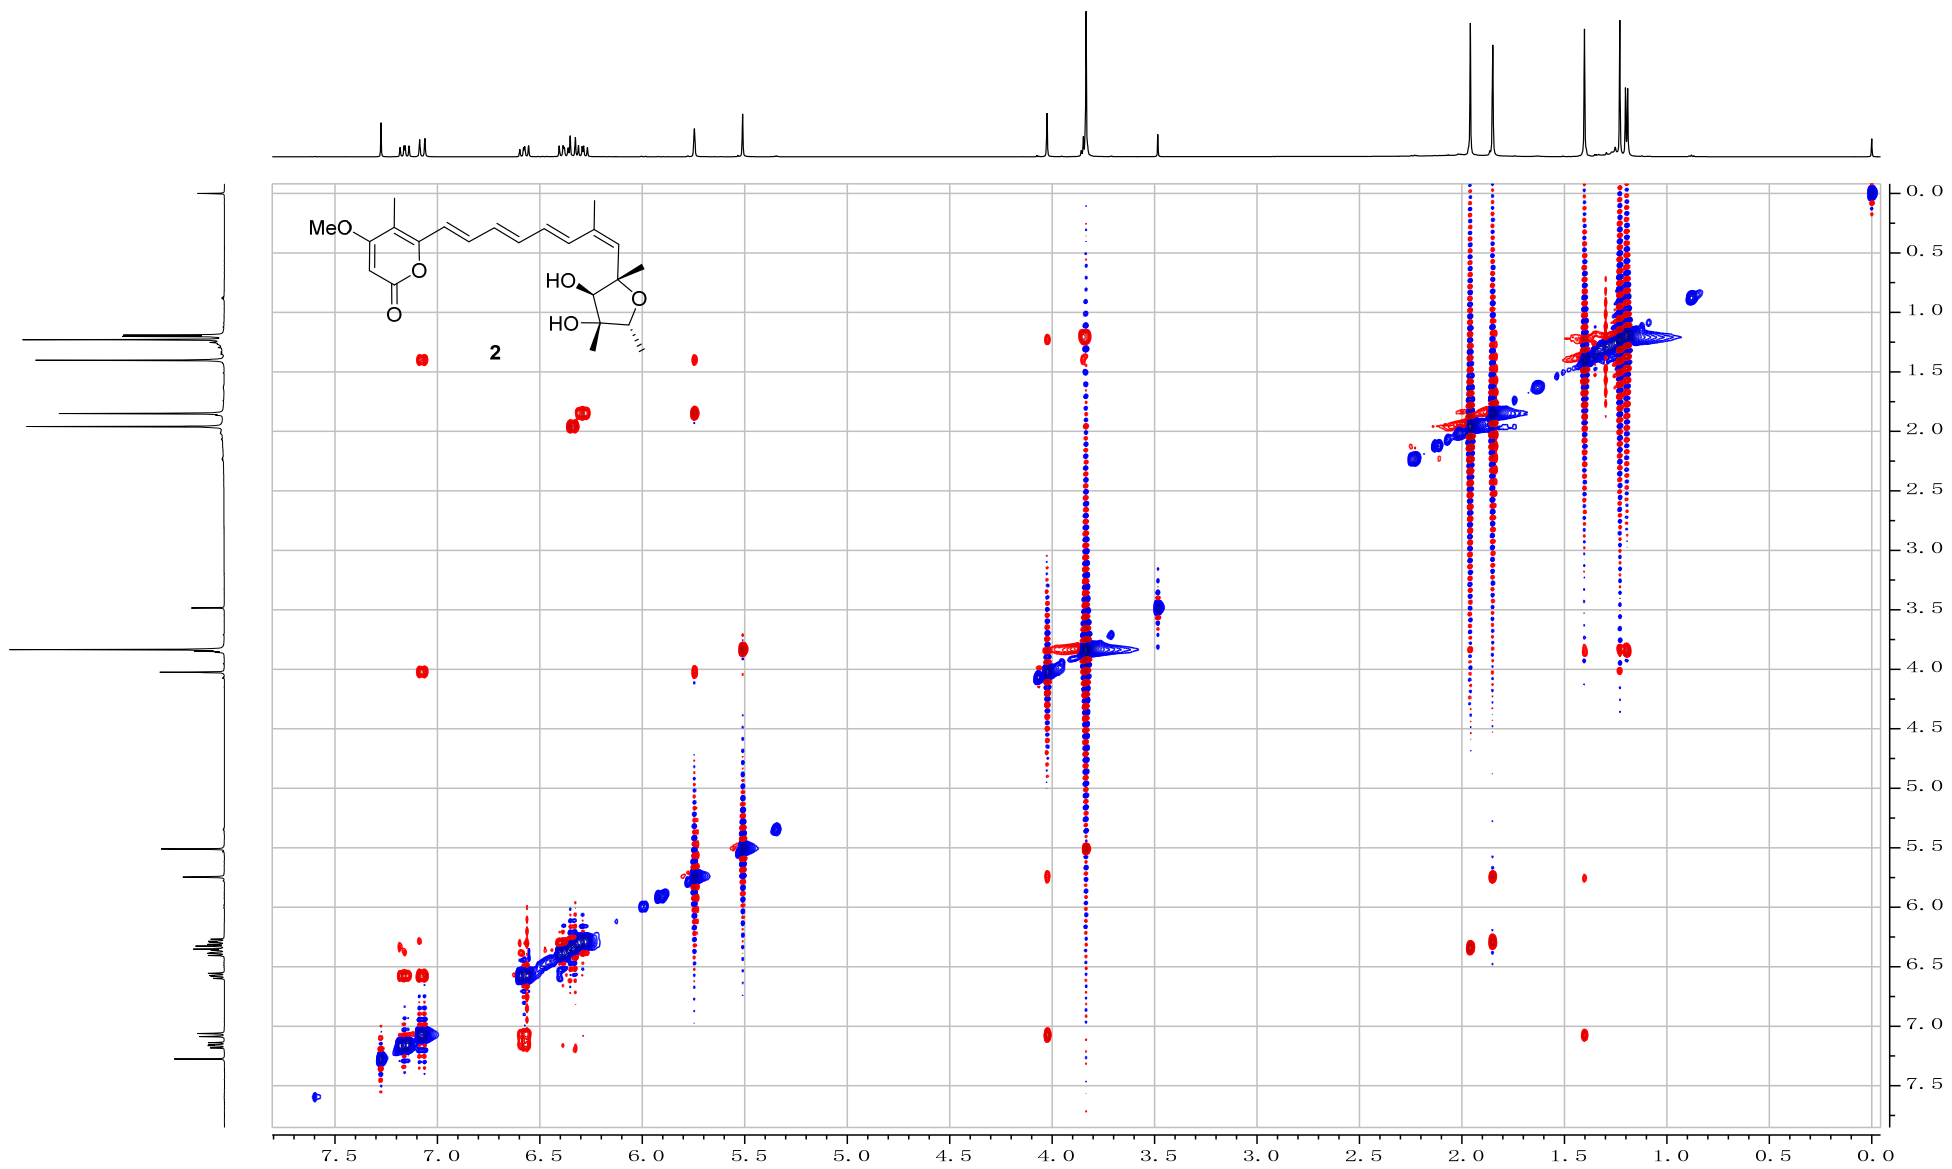

**Figure S16.** The ROESY spectrum of (+)-neocitreoviridin (**2**) in CDCl<sub>3</sub> (600 MHz).

F46-12\_HRMS #14 RT: 0.44 AV: 1 NL: 1.56E6  
T: FTMS + c ESI Full ms [390.00-430.00]

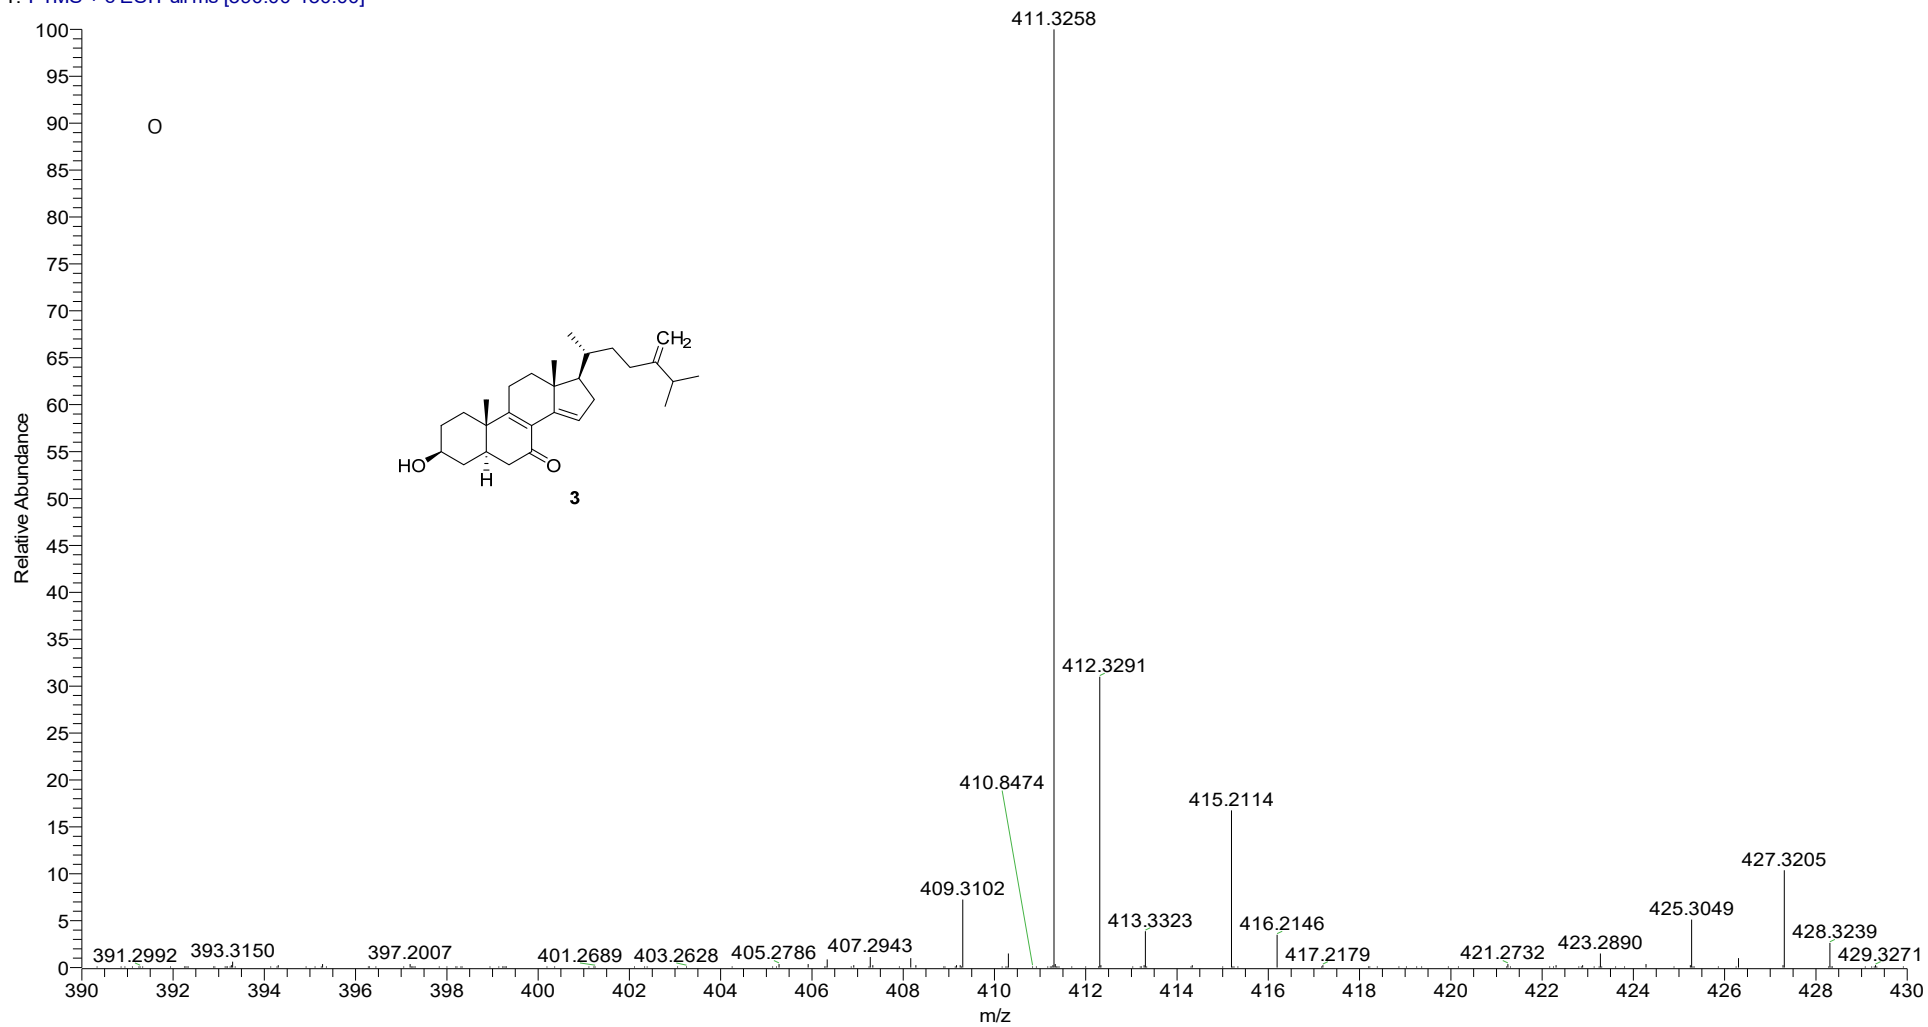

Figure S17. The (+)-HRESIMS spectrum of 3β-hydroxyergosta-8,14,24(28)-trien-7-one (3).

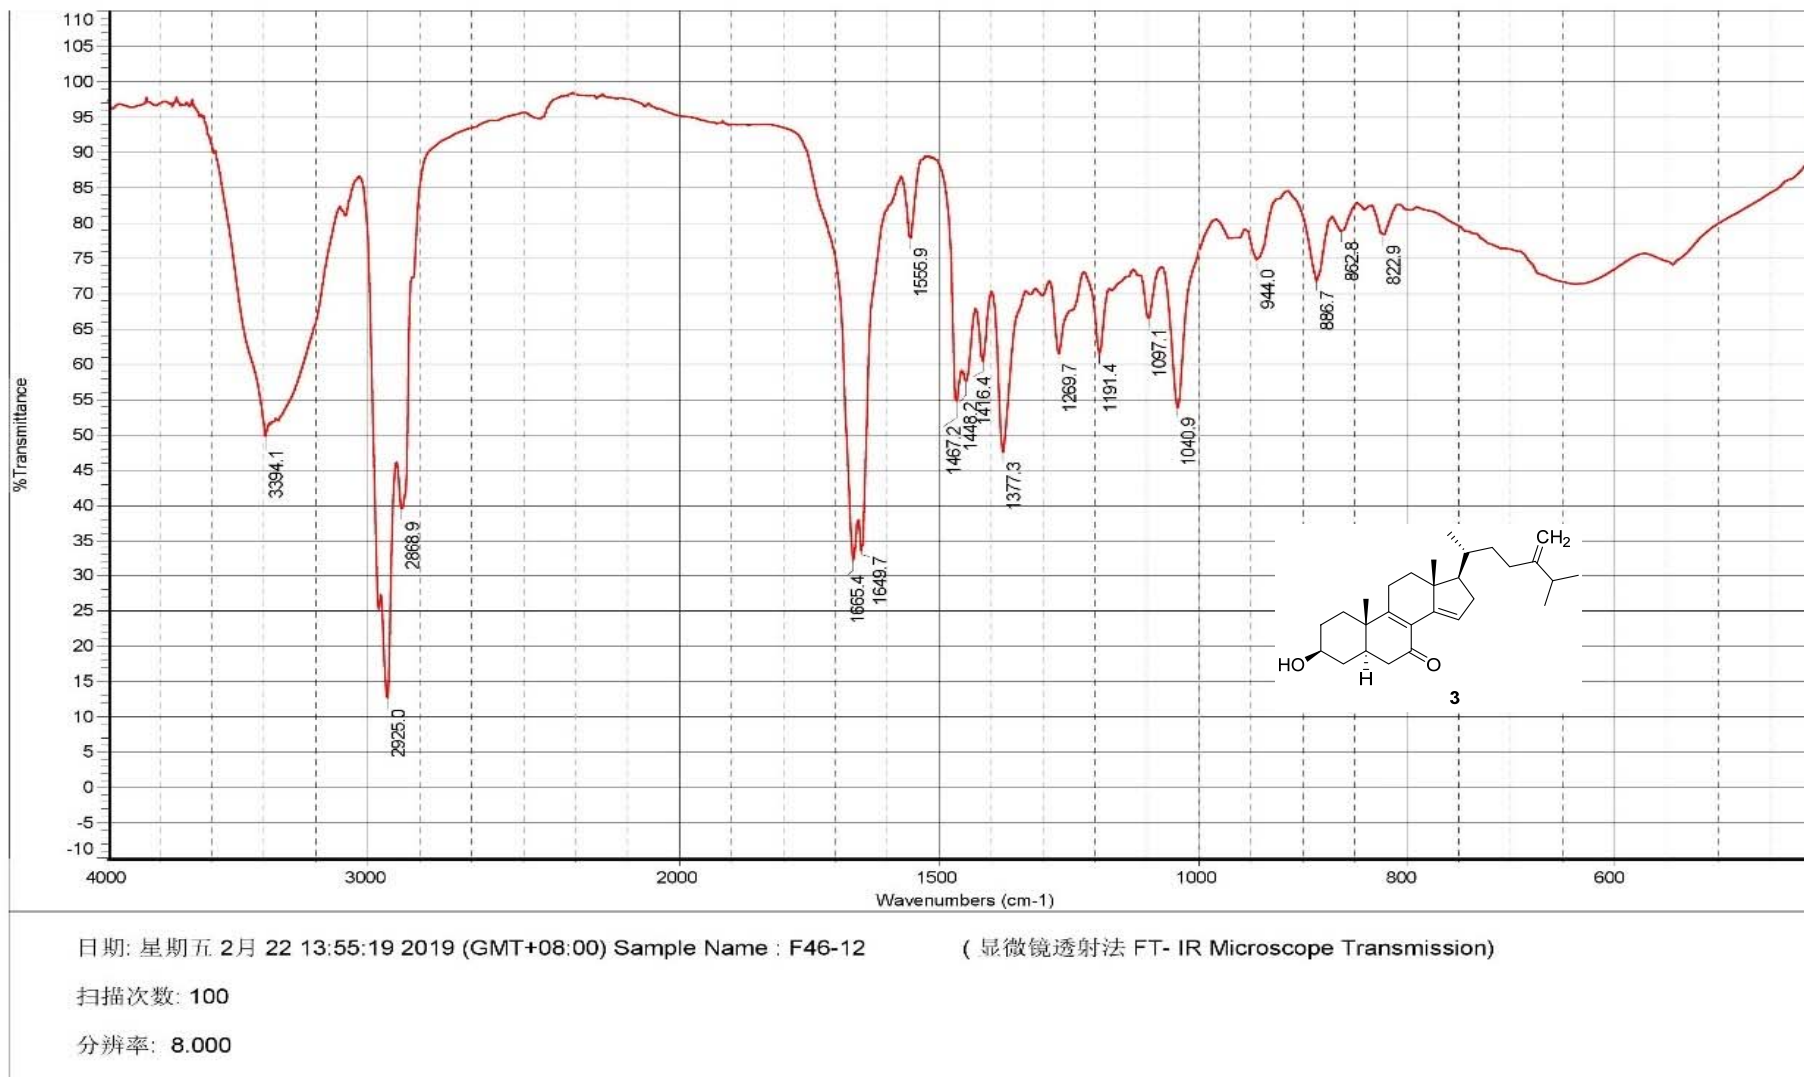

Figure S18. The IR spectrum of 3 $\beta$ -hydroxyergosta-8,14,24(28)-trien-7-one (**3**).

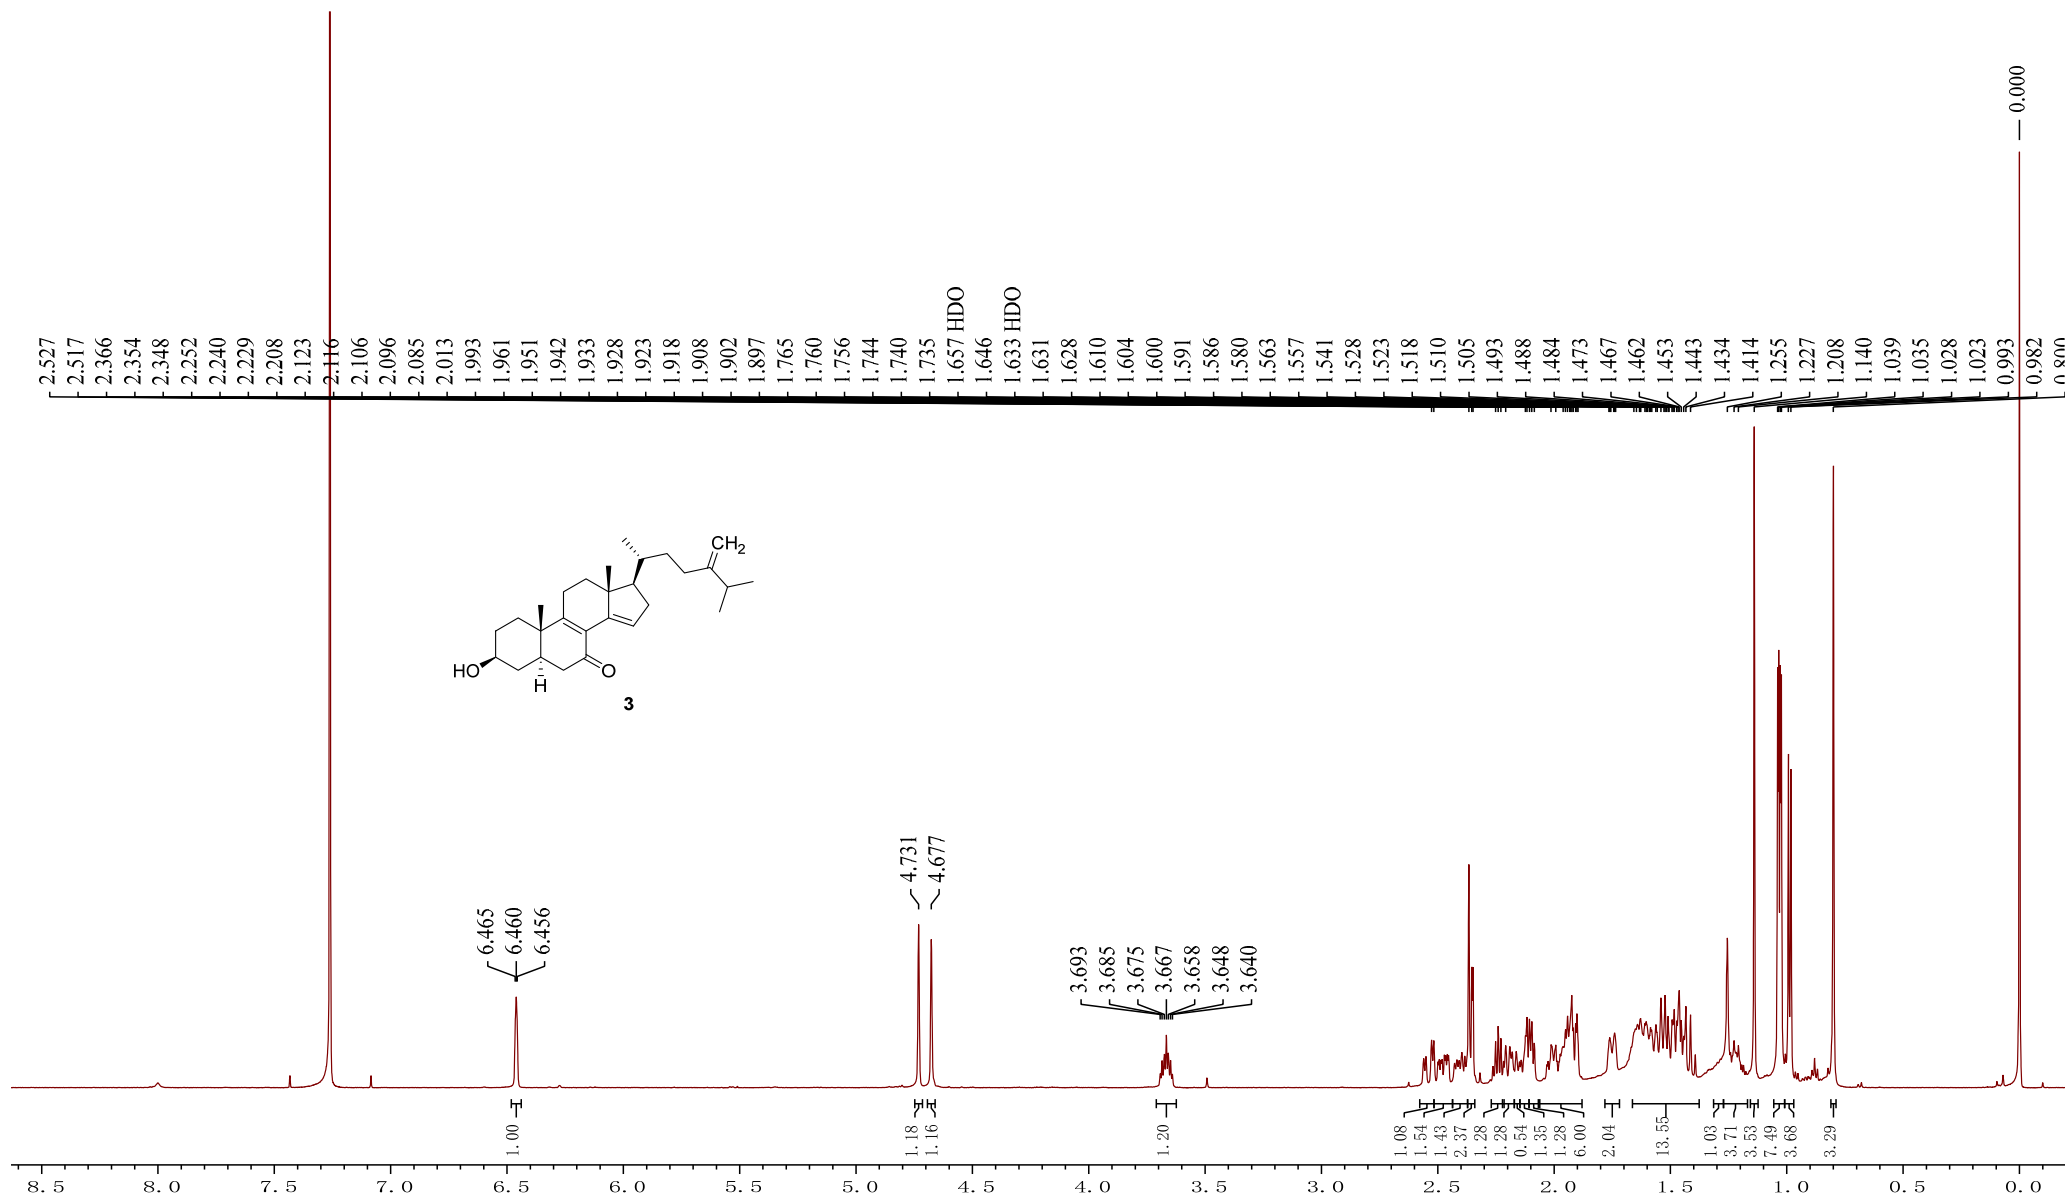

**Figure S19.** The  $^1\text{H}$  NMR spectrum of  $3\beta$ -hydroxyergosta-8,14,24(28)-trien-7-one (**3**) in  $\text{CDCl}_3$  (600 MHz).



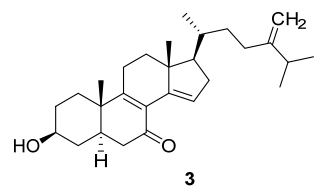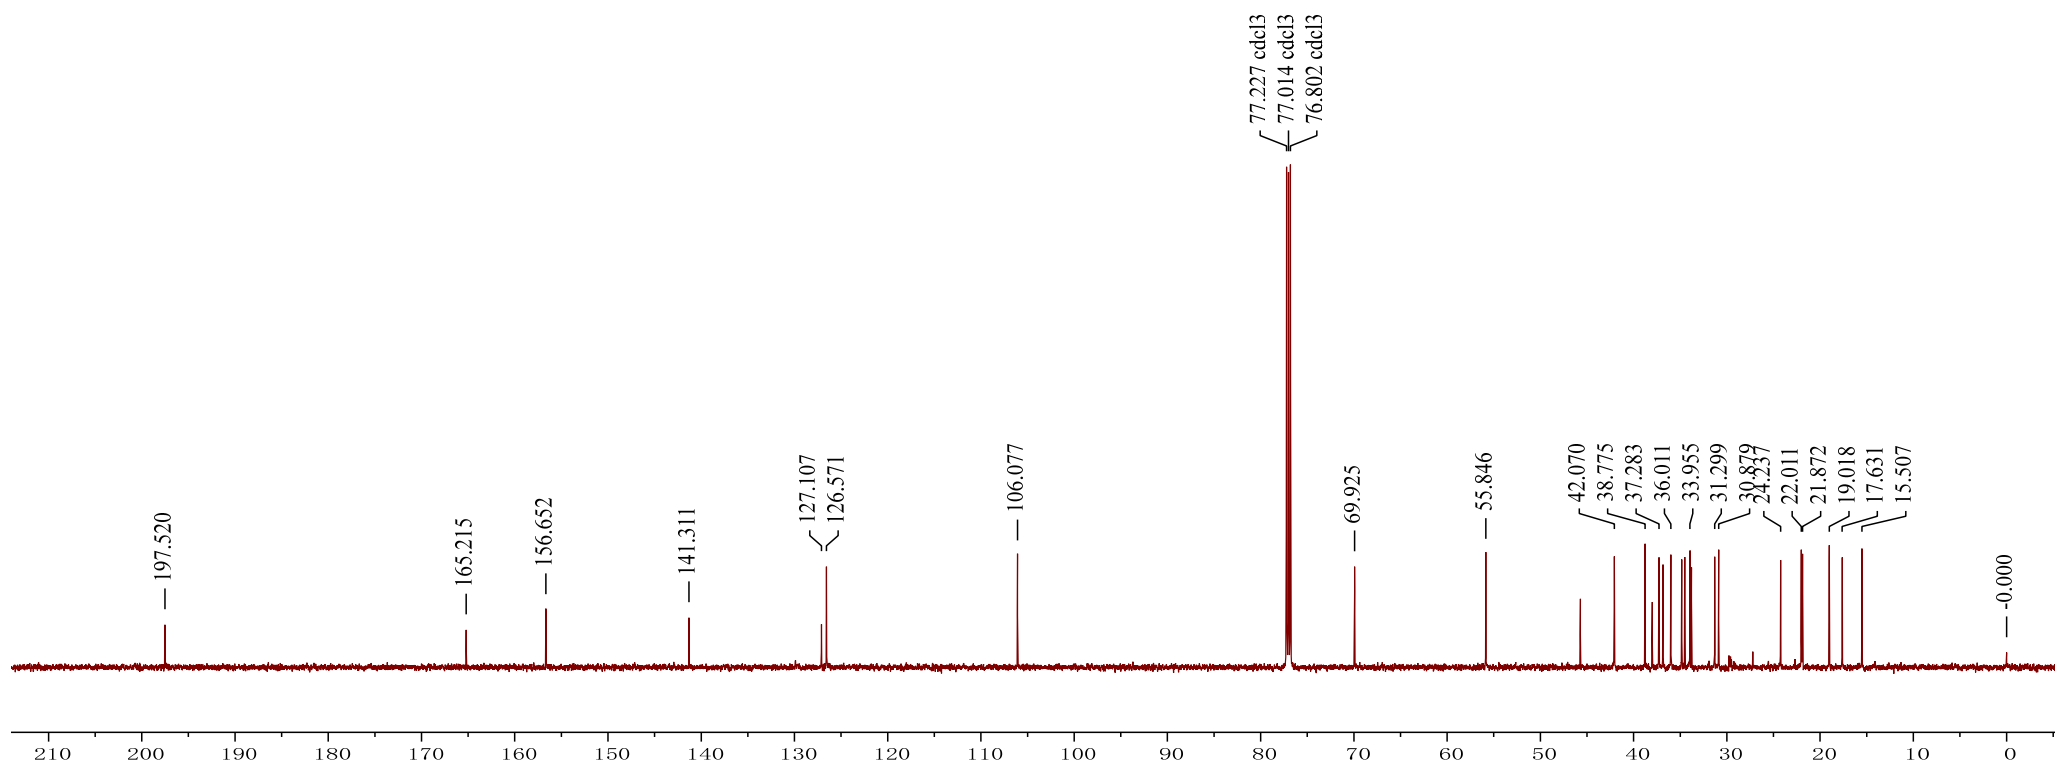

**Figure S20.** The  $^{13}\text{C}$  NMR spectrum of  $3\beta$ -hydroxyergosta-8,14,24(28)-trien-7-one (**3**) in  $\text{CDCl}_3$  (150 MHz).

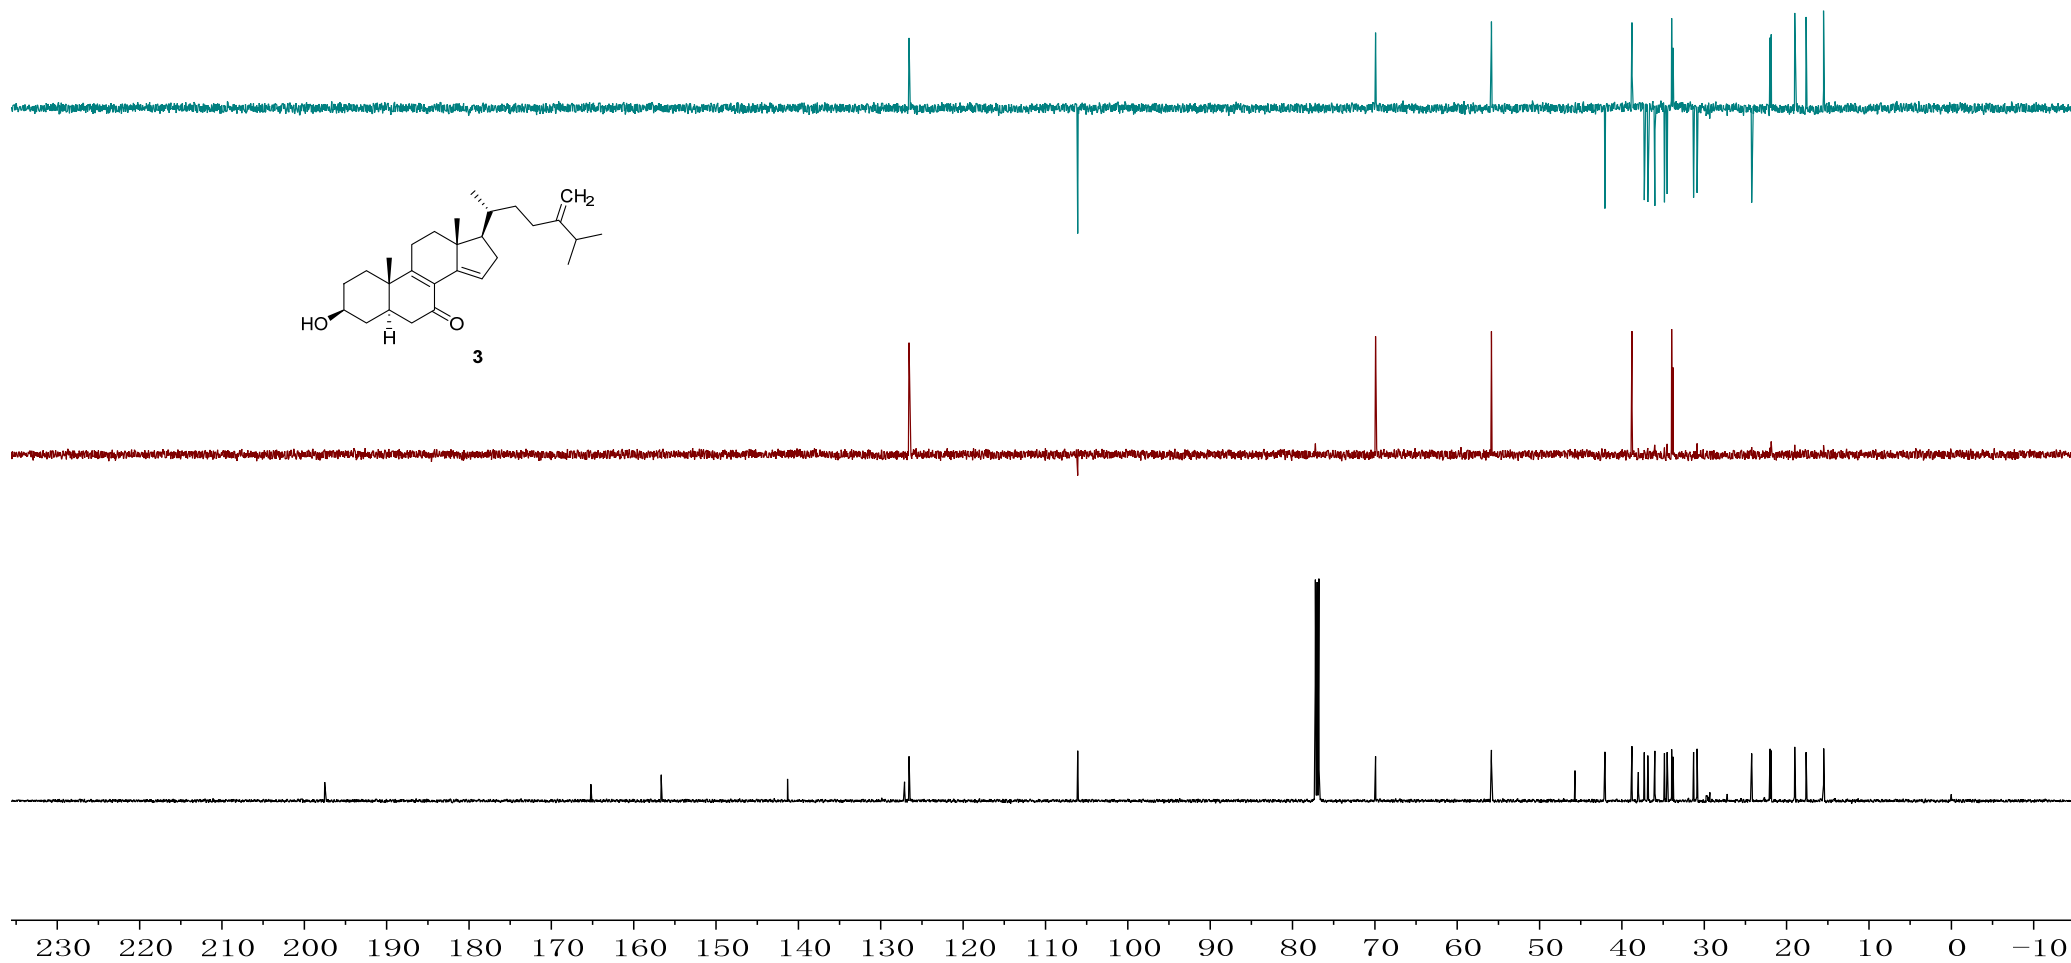

**Figure S21.** The DEPT spectrum of 3β-hydroxyergosta-8,14,24(28)-trien-7-one (**3**) in CDCl<sub>3</sub> (150 MHz).

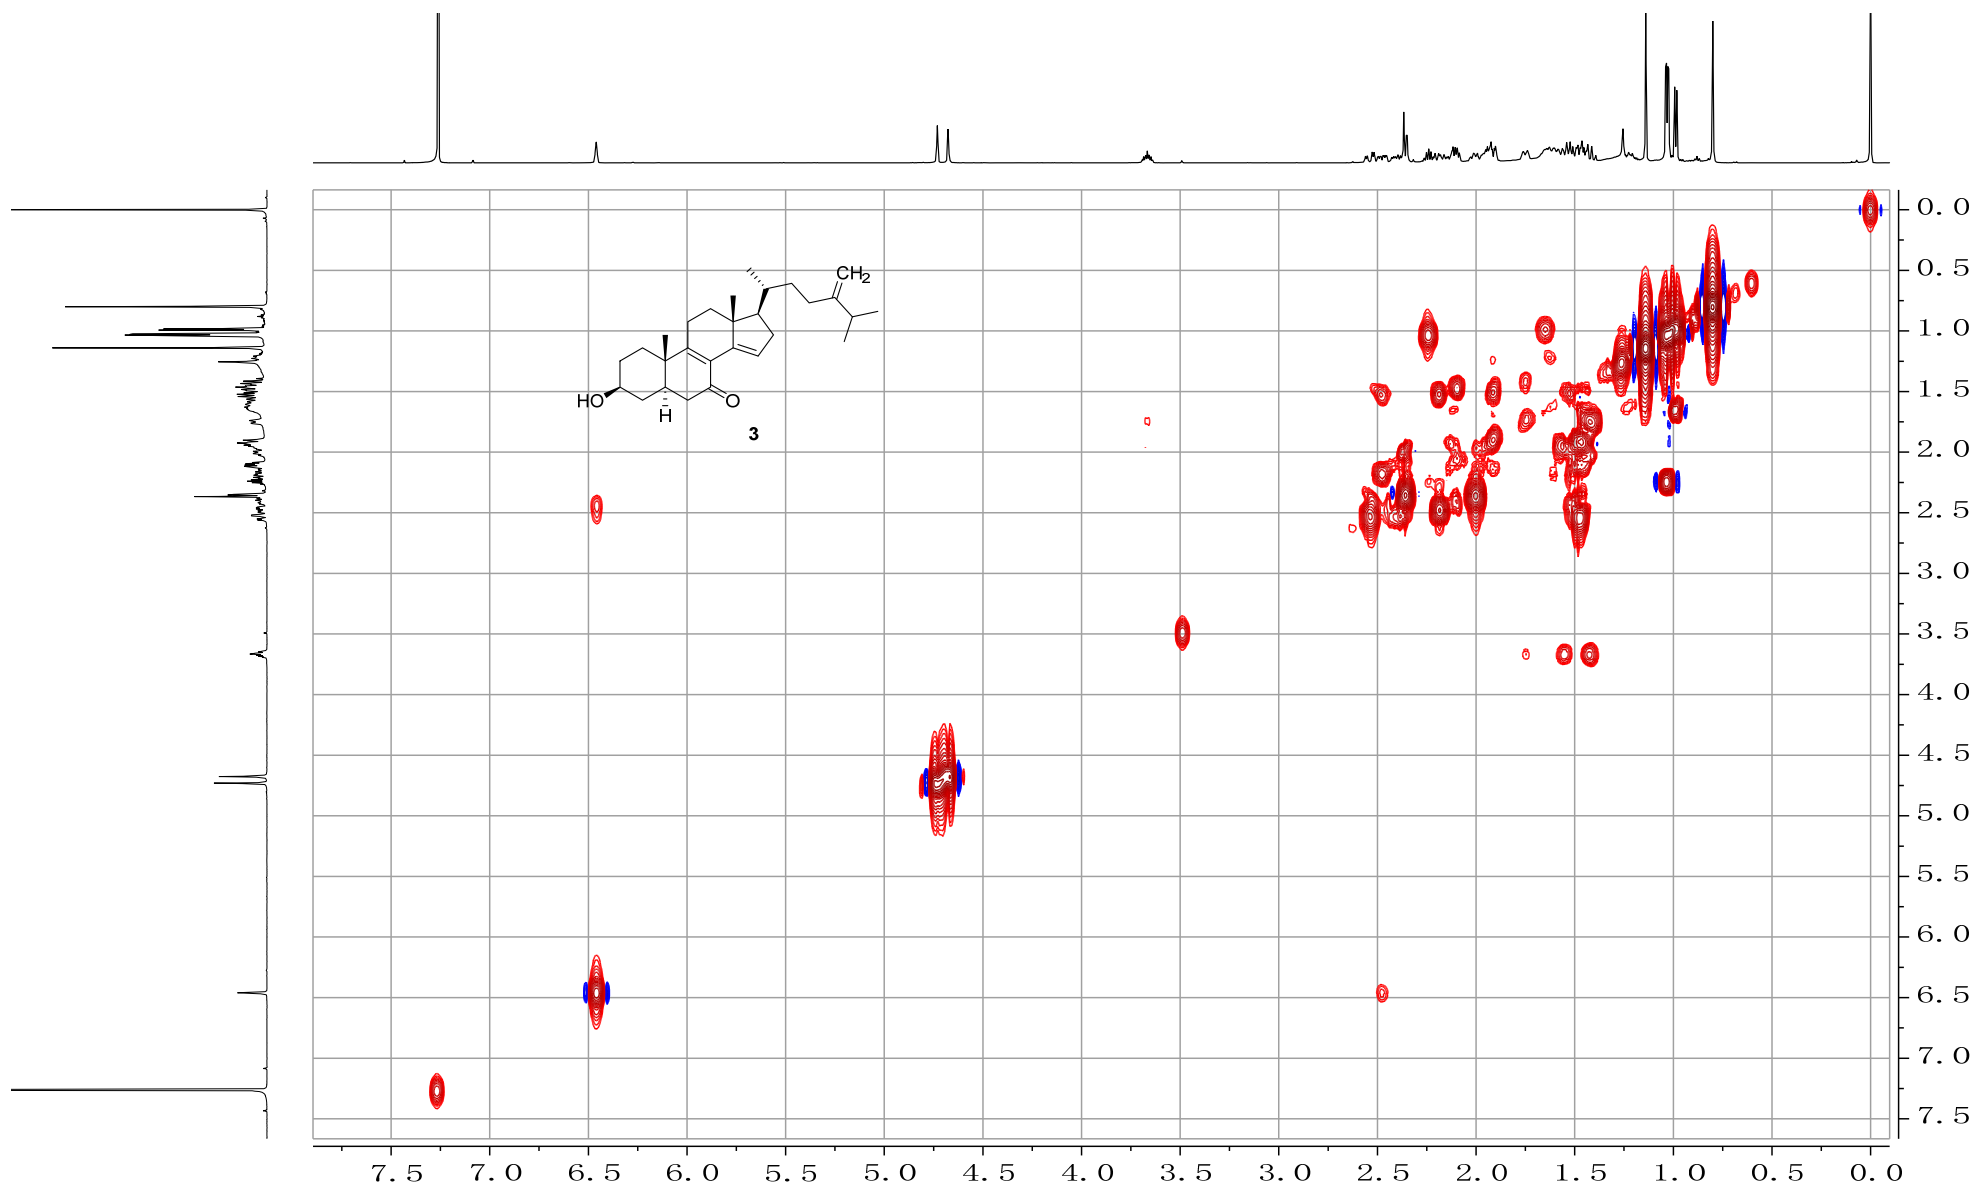

**Figure S22.** The  $^1\text{H}$ - $^1\text{H}$  COSY spectrum of  $3\beta$ -hydroxyergosta-8,14,24(28)-trien-7-one (**3**) in  $\text{CDCl}_3$  (600 MHz).

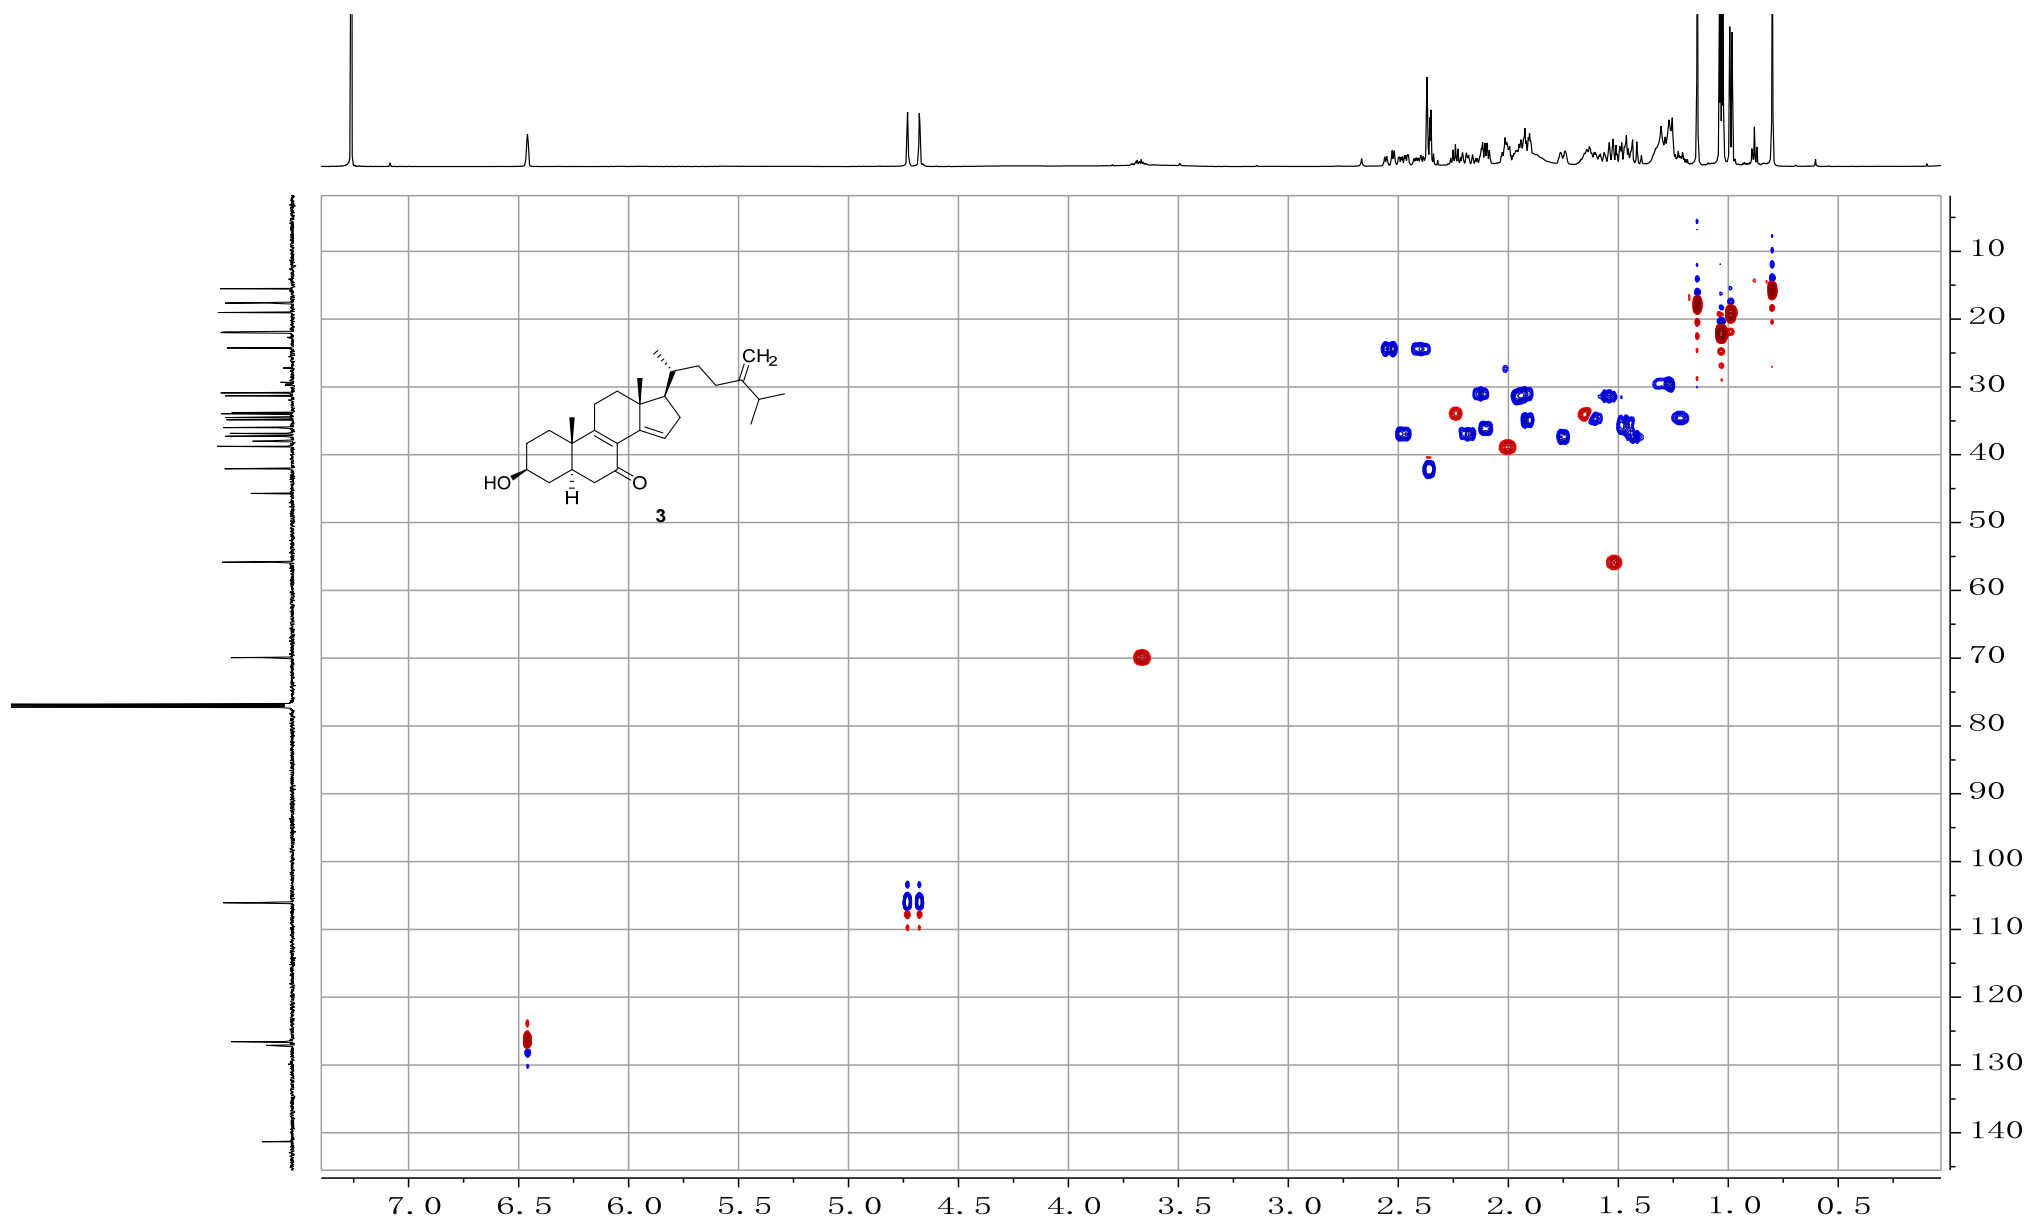

**Figure S23.** The HSQC spectrum of 3β-hydroxyergosta-8,14,24(28)-trien-7-one (**3**) in CDCl<sub>3</sub> (600 MHz).

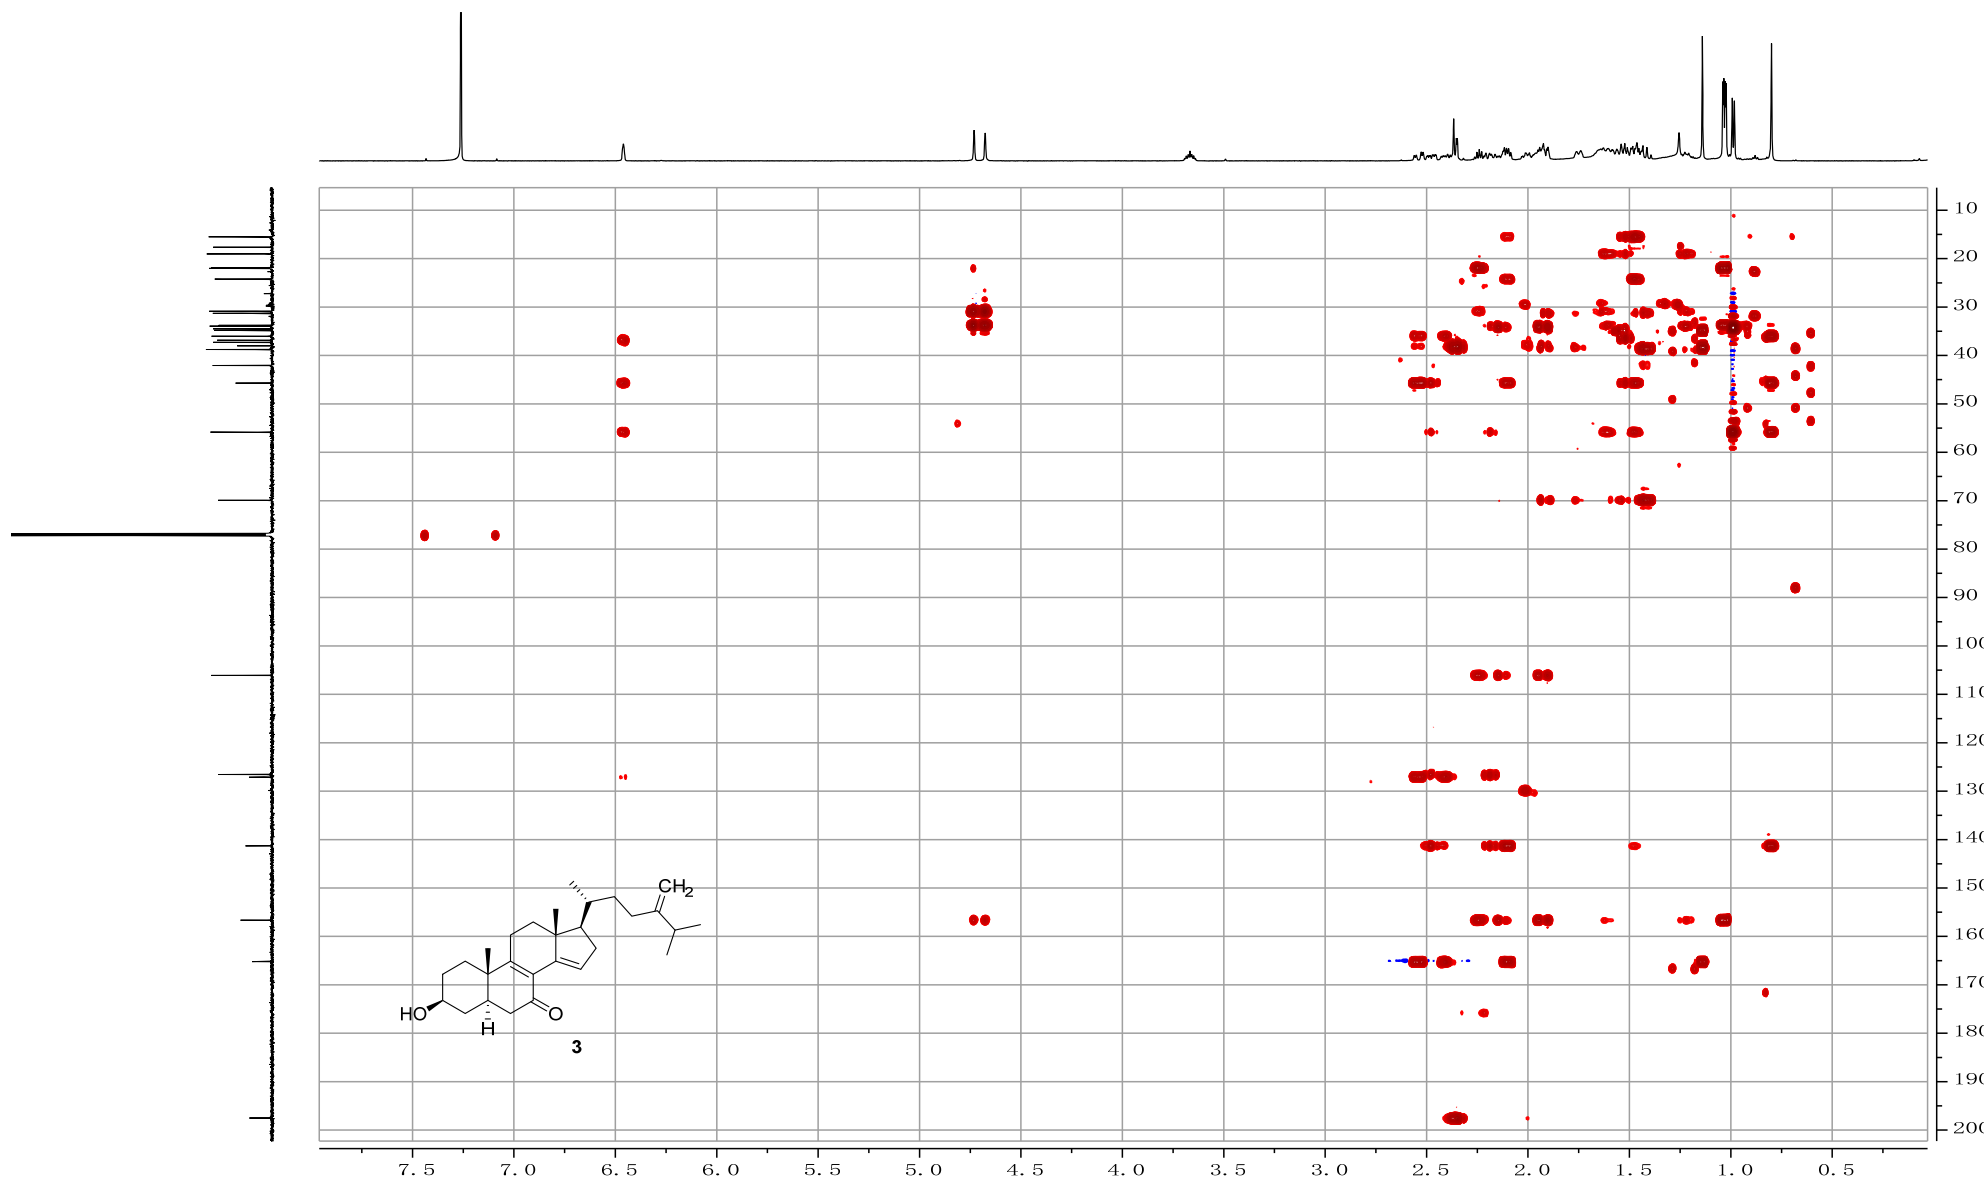

Figure S24. The HMBC spectrum of 3β-hydroxyergosta-8,14,24(28)-trien-7-one (**3**) in CDCl<sub>3</sub> (600 MHz).

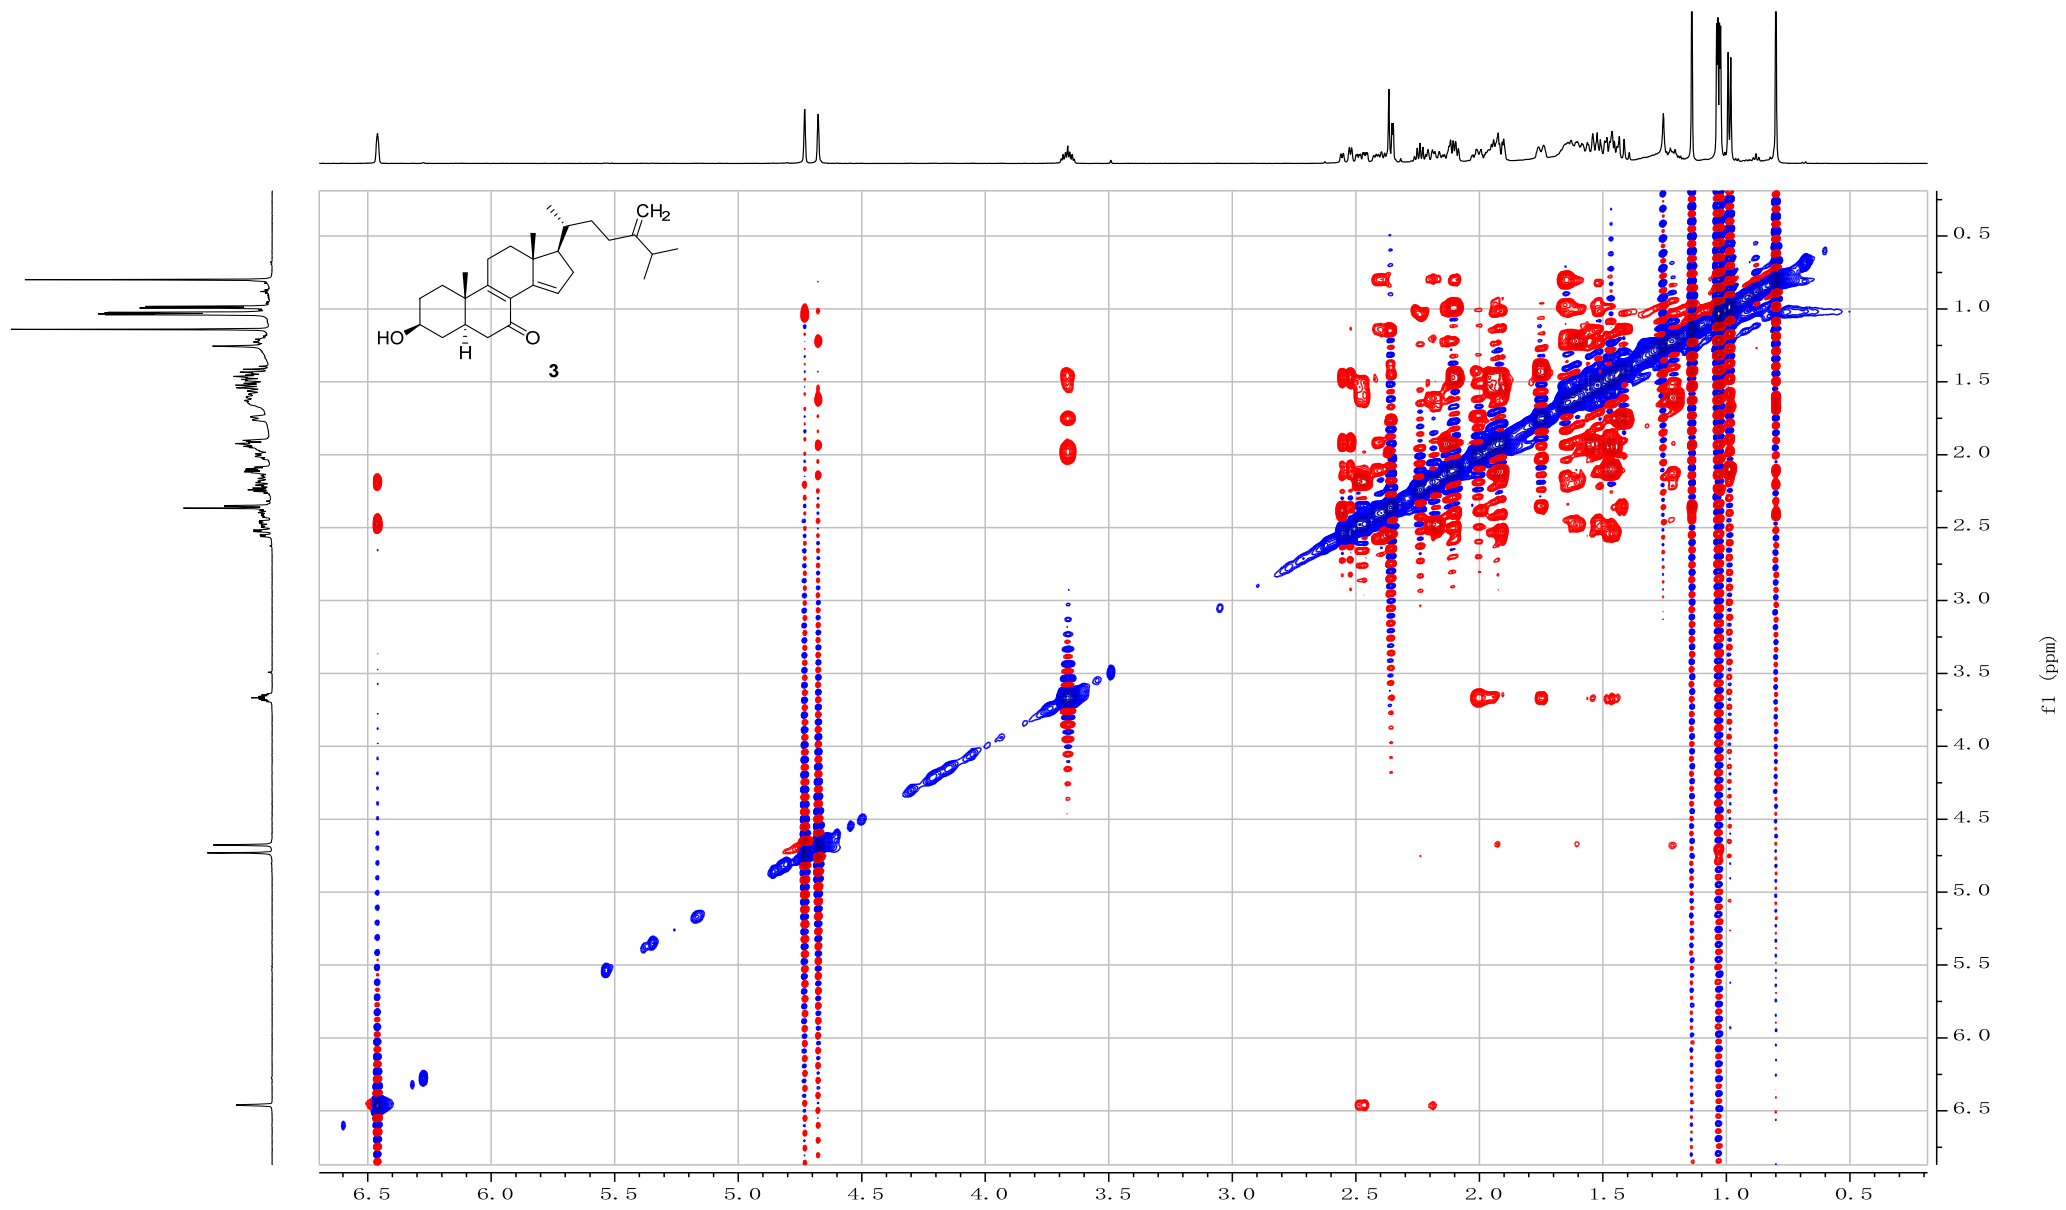

**Figure S25.** The ROESY spectrum of 3 $\beta$ -hydroxyergosta-8,14,24(28)-trien-7-one (**3**) in CDCl<sub>3</sub> (600 MHz)

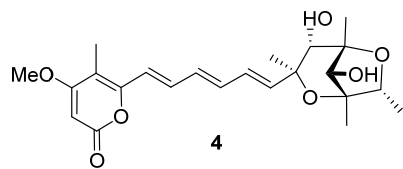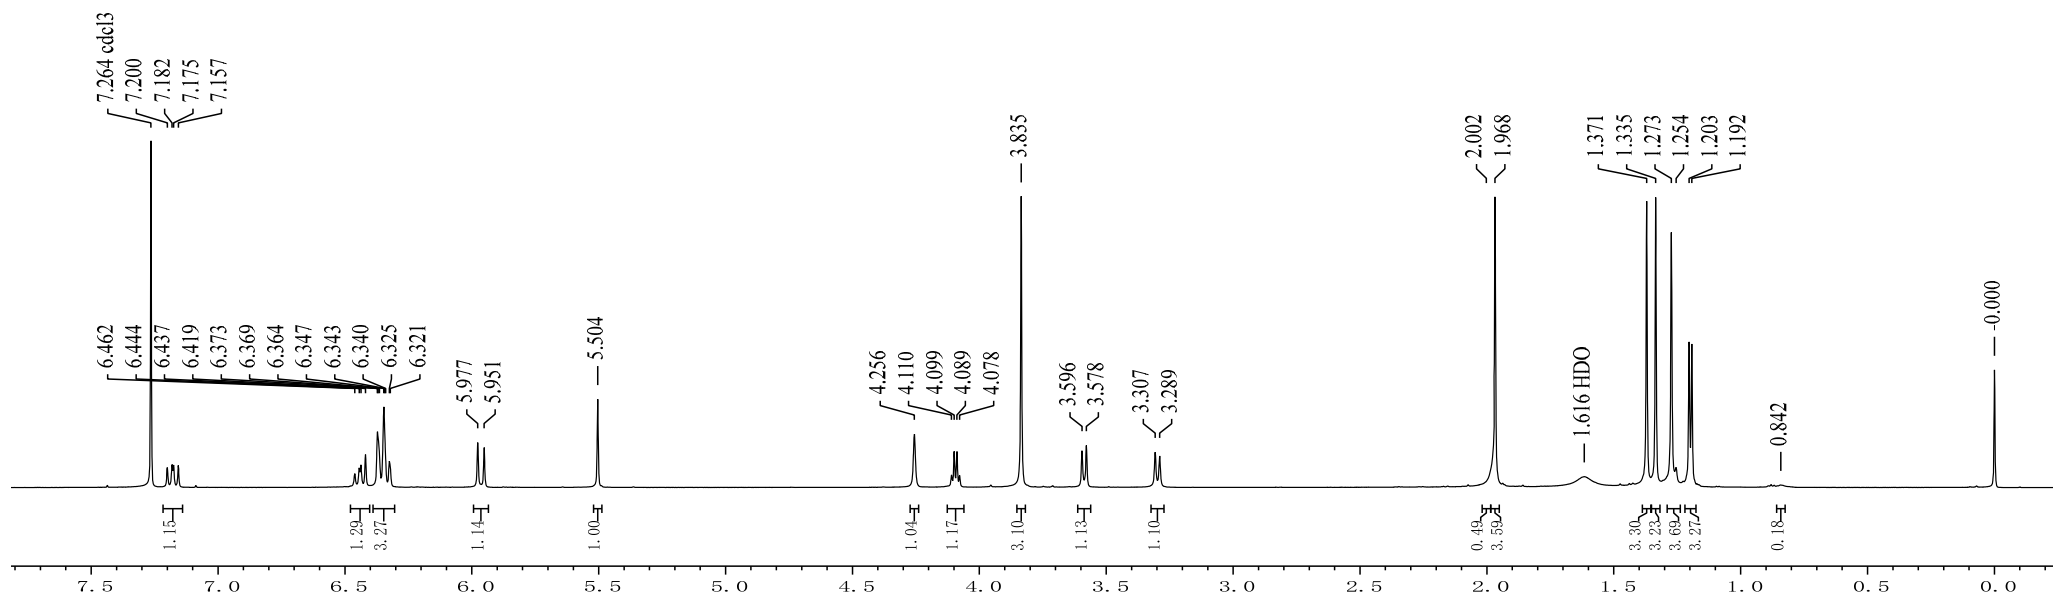

**Figure S26.** The  $^1\text{H}$  NMR spectrum of episocitreoviridinol (**4**) in  $\text{CDCl}_3$  (600 MHz).

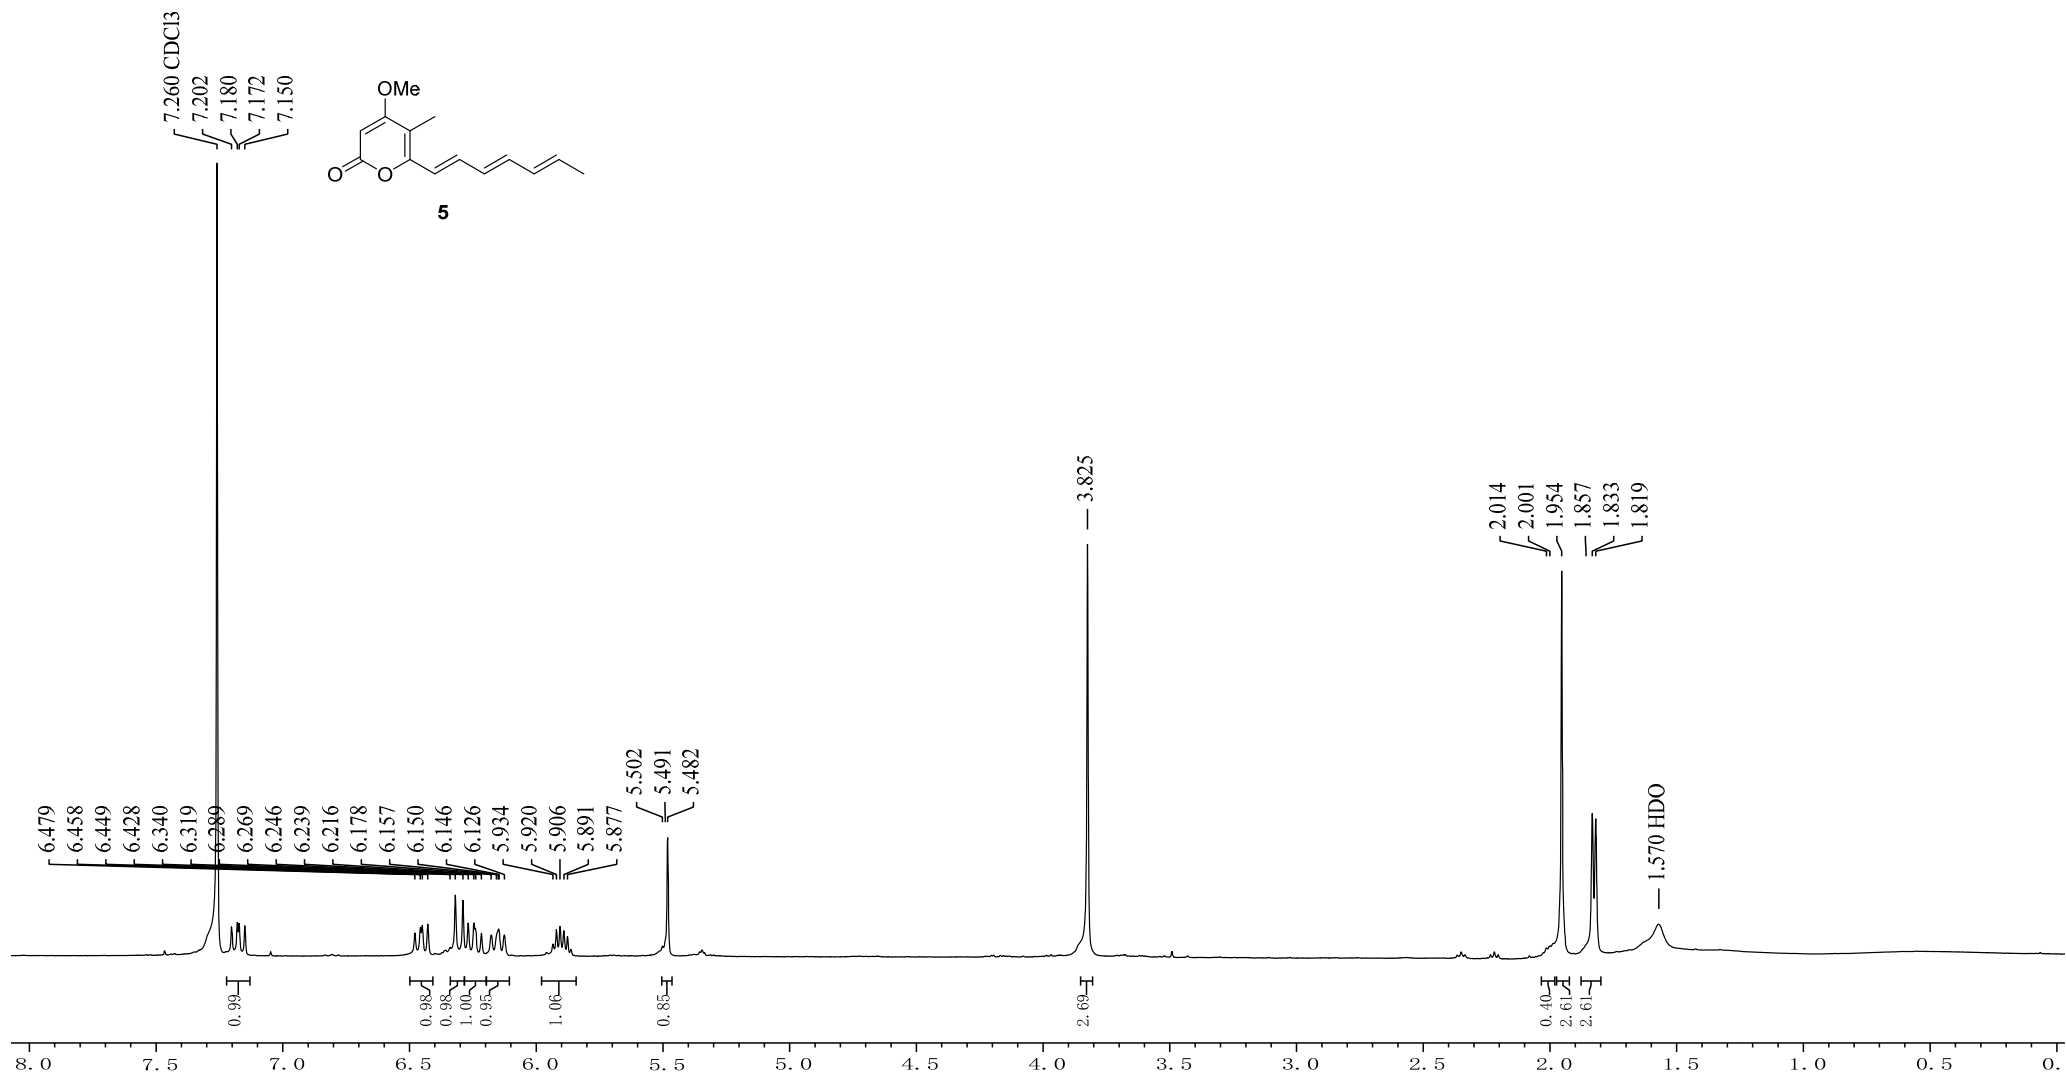

Figure S27. The <sup>1</sup>H NMR spectrum of citreoviripyron B (5) in CDCl<sub>3</sub> (600 MHz).



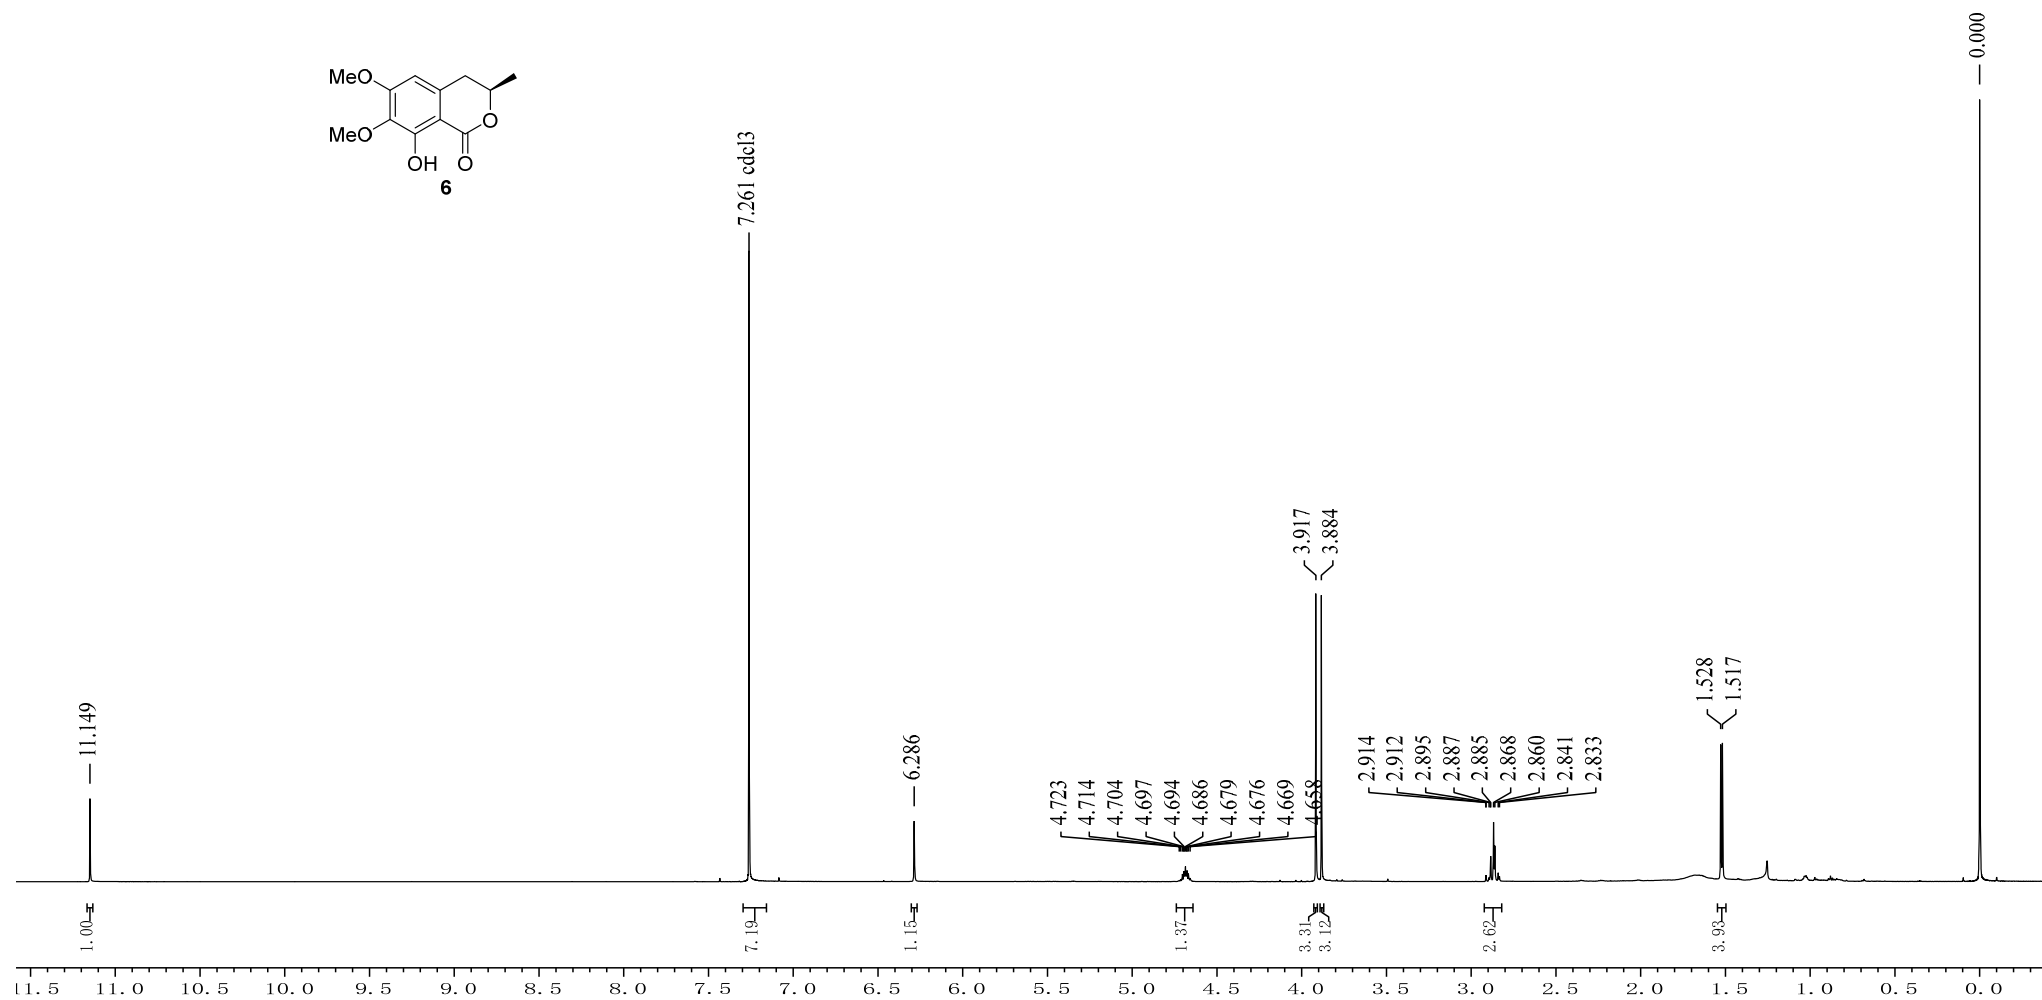

Figure S28. The <sup>1</sup>H NMR spectrum of kigelin (6) in CDCl<sub>3</sub> (600 MHz).

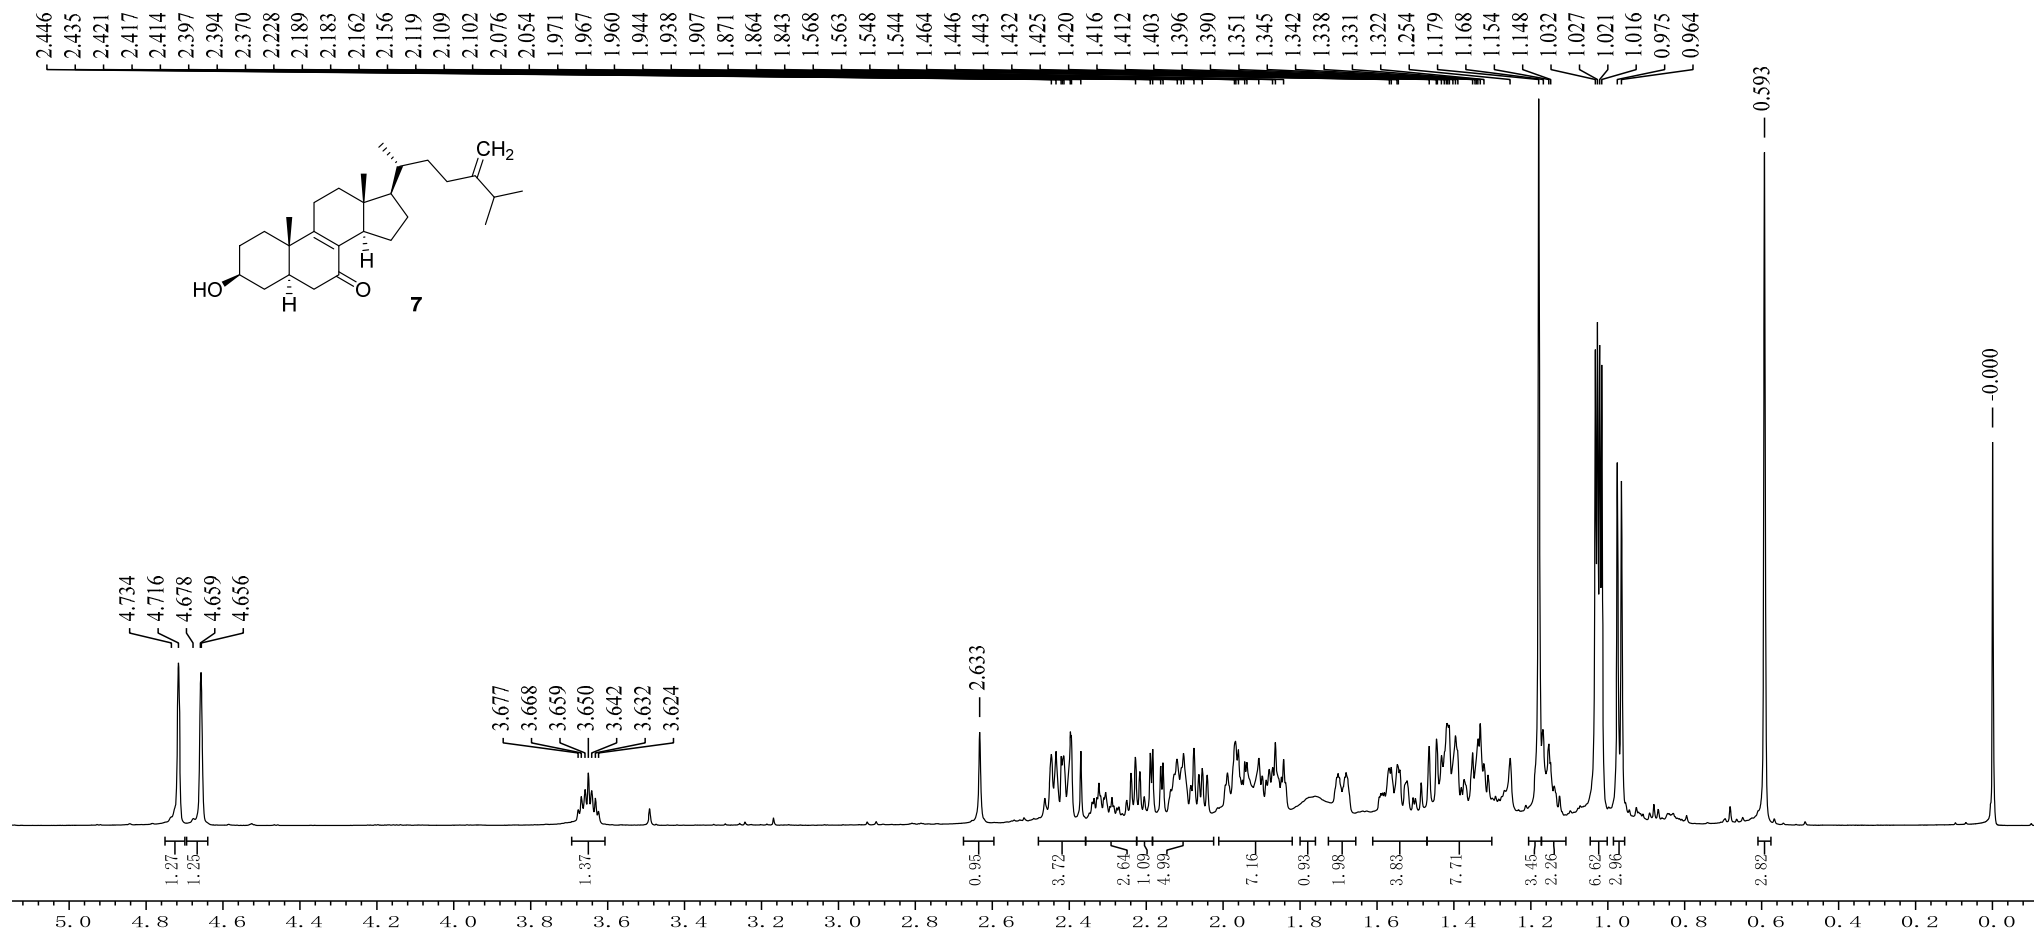

Figure S29. The <sup>1</sup>H NMR spectrum of 3β-hydroxyergosta-8,24(28)-dien-7-one (7) in CDCl<sub>3</sub> (600 MHz).

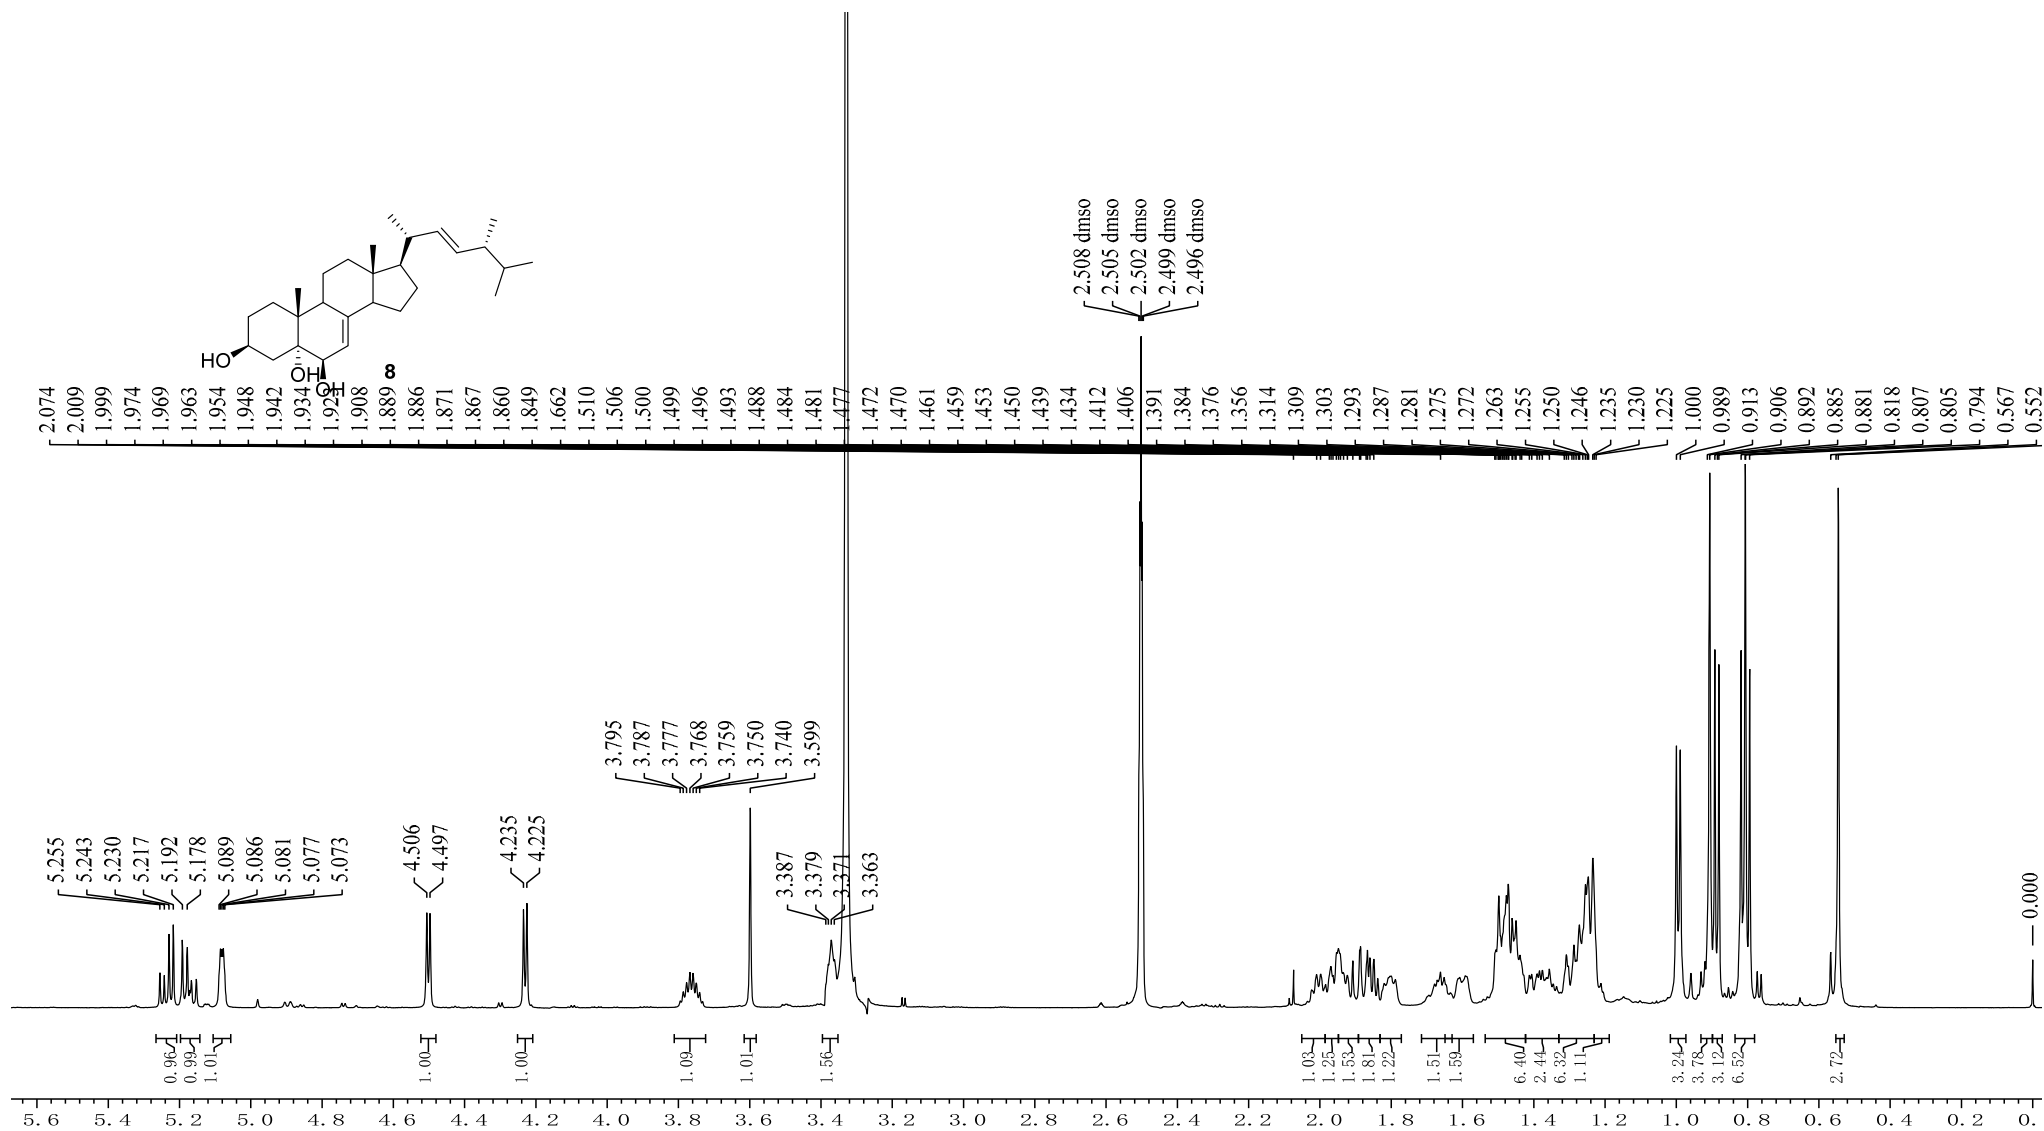

Figure S30. The <sup>1</sup>H NMR spectrum of (22*E*,24*R*)-24-methyl-5 $\alpha$ -cholesta-7,22-dien-3 $\beta$ ,5,6 $\beta$ -triol (**8**) in DMSO-*d*<sub>6</sub> (600 MHz).

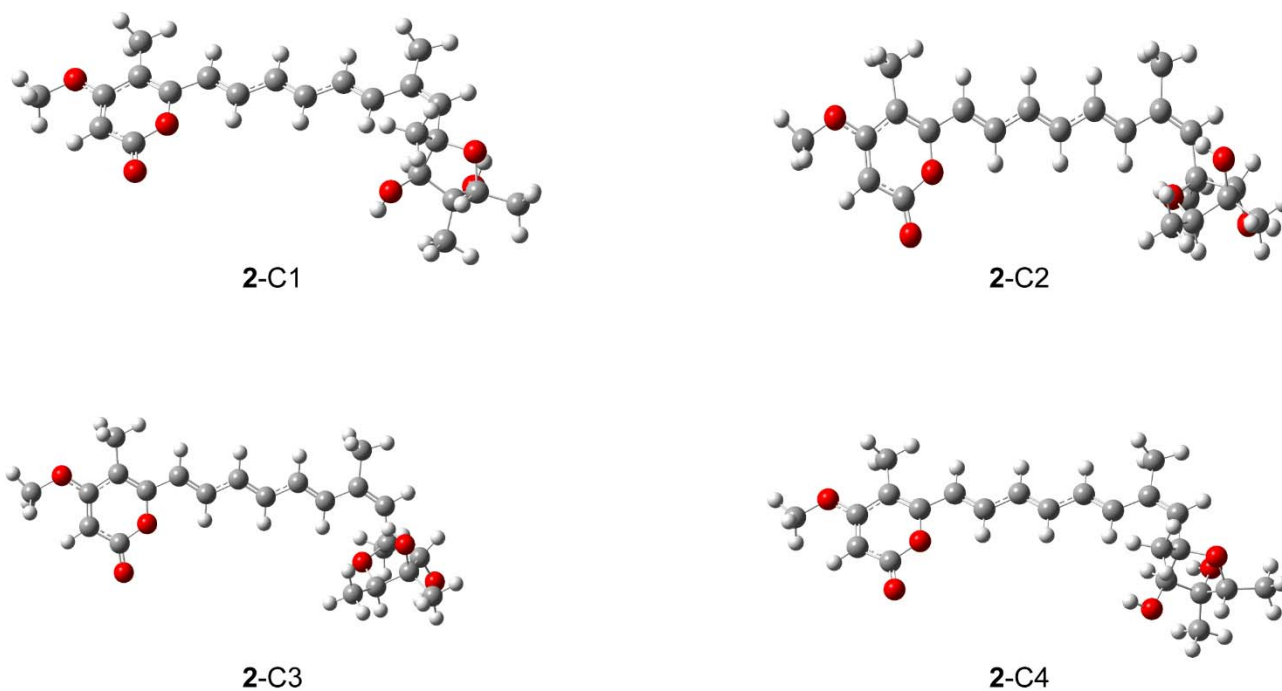

**Figure S31.** Optimized conformers ( $\geq 1\%$ ) of  $14S,15R,16R,17R-2$  at the M06-2X/6-311+G(d,p) level in MeOH

**Table S2.** Boltzmann populations of the identified conformers for  $14S,15R,16R,17R-2$

| conformer | G (Hartree)  | $\Delta G$ (Kcal/mol) | P (%) |
|-----------|--------------|-----------------------|-------|
| 2-C1      | -1345.200346 | 0.0000                | 70.68 |
| 2-C2      | -1345.199113 | 0.7737                | 19.13 |
| 2-C3      | -1345.198076 | 1.4244                | 6.37  |
| 2-C4      | -1345.197594 | 1.7269                | 3.82  |

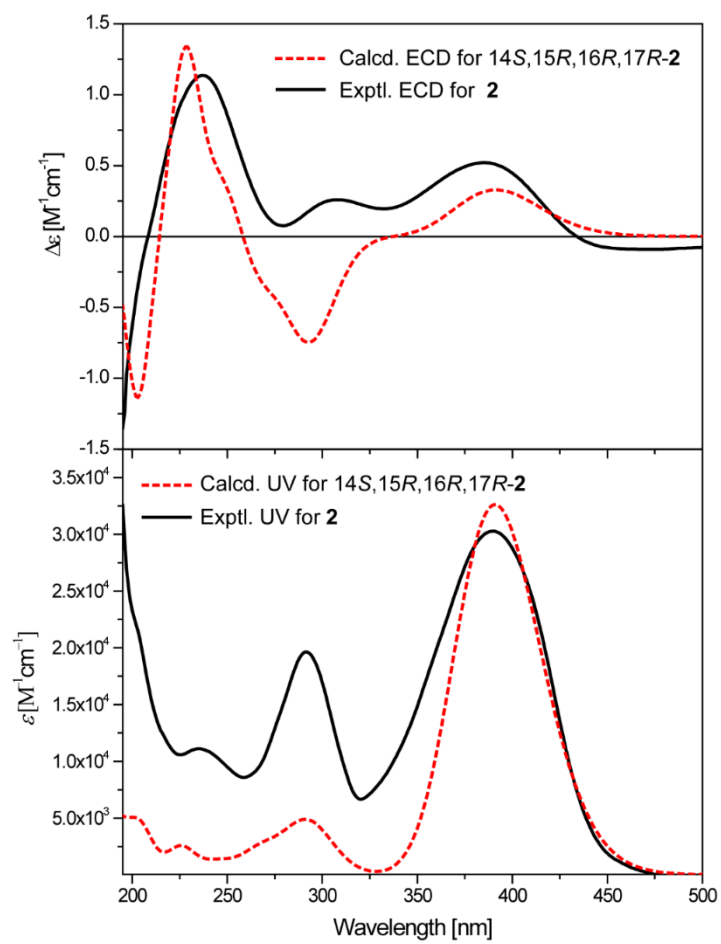

**Figure S32.** Comparison of the experimental and calculated ECD and UV spectra of **2**

**Table S3.** Calculated ECD data for conformers **2-C1** and **2-C2** at the Cam-B3LYP/TZVP//M06-2X/6-311+G(d,p) level in MeOH

| Excited State | 2-C1              |                |          |          |          | 2-C2              |                |          |          |          |
|---------------|-------------------|----------------|----------|----------|----------|-------------------|----------------|----------|----------|----------|
|               | $\Delta E^a$ (eV) | $\lambda^b$ nm | $f^c$    | $Rlen^d$ | $Rvel^e$ | $\Delta E^a$ (eV) | $\lambda^b$ nm | $f^c$    | $Rlen^d$ | $Rvel^e$ |
| 1             | 3.2976            | 376.2437       | 26.59694 | 30.6822  | 26.59694 | 3.3007            | 375.8903       | 26.62194 | -27.7202 | -27.0569 |
| 2             | 4.4601            | 278.1779       | 35.97314 | -49.3939 | 35.97314 | 4.4844            | 276.67048      | 36.16913 | 41.9392  | 50.0977  |
| 3             | 4.8915            | 253.6443       | 39.45261 | -17.6266 | 39.45261 | 4.8937            | 253.53027      | 39.47036 | 12.7071  | 15.5789  |
| 4             | 5.3433            | 232.1975       | 43.09662 | 17.3659  | 43.09662 | 5.4464            | 227.80205      | 43.92818 | -12.2595 | -14.8884 |
| 5             | 5.5655            | 222.9272       | 44.88879 | 8.0492   | 44.88879 | 5.454             | 227.48462      | 43.98948 | -4.4356  | -7.8779  |
| 6             | 5.5918            | 221.8787       | 45.10091 | 0.0352   | 45.10091 | 5.5976            | 221.64876      | 45.14769 | -0.6408  | -18.3102 |
| 7             | 5.791             | 214.2464       | 46.70757 | 45.2304  | 46.70757 | 5.5981            | 221.62896      | 45.15173 | -20.9574 | -0.2514  |
| 8             | 5.9024            | 210.2028       | 47.60607 | 10.4811  | 47.60607 | 5.8876            | 210.73121      | 47.4867  | -17.5602 | -11.223  |
| 9             | 6.0844            | 203.9151       | 49.074   | 7.6707   | 49.074   | 6.0524            | 204.99324      | 48.8159  | -4.7534  | -14.7205 |
| 10            | 6.3729            | 194.6839       | 51.40091 | -6.5499  | 51.40091 | 6.3824            | 194.39413      | 51.47753 | 4.7904   | 6.2458   |
| 11            | 6.5552            | 189.2698       | 52.87126 | -8.4791  | 52.87126 | 6.5325            | 189.92746      | 52.68817 | 2.4564   | 2.7974   |
| 12            | 6.6074            | 187.7745       | 53.29228 | -15.1166 | 53.29228 | 6.6145            | 187.57292      | 53.34955 | 29.6829  | 21.8014  |
| 13            | 6.6288            | 187.1683       | 53.46488 | -25.0253 | 53.46488 | 6.6199            | 187.41992      | 53.3931  | 5.7702   | 13.643   |
| 14            | 6.7281            | 184.4059       | 54.26579 | 4.362    | 54.26579 | 6.6733            | 185.92017      | 53.8238  | -7.6567  | -7.2471  |
| 15            | 6.9426            | 178.7084       | 55.99585 | -12.9955 | 55.99585 | 6.9821            | 177.69741      | 56.31444 | 19.7644  | 13.9829  |
| 16            | 7.0426            | 176.1709       | 56.80241 | 2.2762   | 56.80241 | 7.0098            | 176.99522      | 56.53786 | 0.0296   | 12.2931  |
| 17            | 7.0559            | 175.8388       | 56.90968 | -7.4568  | 56.90968 | 7.0461            | 176.08338      | 56.83063 | 2.1474   | -3.776   |
| 18            | 7.1309            | 173.9894       | 57.51459 | 5.6598   | 57.51459 | 7.1247            | 174.14082      | 57.46459 | -11.4836 | 5.9067   |
| 19            | 7.1685            | 173.0768       | 57.81786 | 11.7441  | 57.81786 | 7.1611            | 173.25566      | 57.75817 | -5.9312  | -24.3423 |
| 20            | 7.1836            | 172.713        | 57.93965 | -0.8164  | 57.93965 | 7.2255            | 171.71145      | 58.27759 | 3.4868   | 10.7131  |
| 21            | 7.2896            | 170.2015       | 58.79459 | 4.2197   | 58.79459 | 7.2876            | 170.24824      | 58.77846 | -4.8904  | -15.3328 |
| 22            | 7.3856            | 167.9892       | 59.56889 | 11.5937  | 59.56889 | 7.3               | 169.95905      | 58.87848 | -23.1811 | -10.9228 |
| 23            | 7.4431            | 166.6915       | 60.03266 | -0.6016  | 60.03266 | 7.4545            | 166.43653      | 60.1246  | -0.1718  | 3.0013   |
| 24            | 7.5101            | 165.2043       | 60.57305 | 6.7348   | 60.57305 | 7.4853            | 165.75169      | 60.37302 | -0.549   | -5.2476  |
| 25            | 7.5651            | 164.0033       | 61.01665 | -9.3323  | 61.01665 | 7.4994            | 165.44005      | 60.48675 | 4.1098   | -0.8876  |
| 26            | 7.6214            | 162.7918       | 61.47074 | -1.8717  | 61.47074 | 7.584             | 163.59455      | 61.16909 | -4.679   | -1.7144  |
| 27            | 7.6558            | 162.0603       | 61.7482  | 3.7813   | 61.7482  | 7.6259            | 162.69569      | 61.50704 | -4.0529  | -6.9897  |
| 28            | 7.6929            | 161.2787       | 62.04743 | -0.8754  | 62.04743 | 7.6945            | 161.24519      | 62.06033 | -3.3626  | 3.9216   |
| 29            | 7.7382            | 160.3346       | 62.4128  | -5.3771  | 62.4128  | 7.7759            | 159.55723      | 62.71687 | 4.5799   | -11.6033 |
| 30            | 7.8092            | 158.8769       | 62.98545 | 6.6686   | 62.98545 | 7.8701            | 157.64744      | 63.47664 | 1.0708   | -6.2282  |
| 31            | 7.8506            | 158.039        | 63.31937 | 0.2737   | 63.31937 | 7.9016            | 157.01897      | 63.73071 | 1.7434   | 0.5937   |
| 32            | 7.9048            | 156.9554       | 63.75652 | 0.7906   | 63.75652 | 7.9332            | 156.39352      | 63.98558 | 4.092    | 5.4792   |
| 33            | 7.9968            | 155.1497       | 64.49855 | 8.5604   | 64.49855 | 8.015             | 154.79739      | 64.64534 | -6.9712  | -8.1076  |
| 34            | 8.0413            | 154.2911       | 64.85746 | 5.9997   | 64.85746 | 8.0216            | 154.67003      | 64.69857 | -2.993   | 33.9608  |
| 35            | 8.083             | 153.4951       | 65.1938  | 1.5752   | 65.1938  | 8.0474            | 154.17416      | 64.90666 | 7.1064   | -15.328  |
| 36            | 8.1454            | 152.3192       | 65.69709 | -0.077   | 65.69709 | 8.1563            | 152.11568      | 65.785   | -4.1604  | -11.8535 |
| 37            | 8.2111            | 151.1005       | 66.22699 | 6.592    | 66.22699 | 8.1712            | 151.8383       | 65.90518 | -11.0796 | 0.2826   |
| 38            | 8.2334            | 150.6912       | 66.40686 | 10.9372  | 66.40686 | 8.1764            | 151.74173      | 65.94712 | -8.5864  | -3.9928  |
| 39            | 8.2614            | 150.1805       | 66.63269 | -9.6292  | 66.63269 | 8.2593            | 150.21867      | 66.61575 | 3.4222   | 5.3137   |
| 40            | 8.2883            | 149.6931       | 66.84965 | -4.1519  | 66.84965 | 8.3126            | 149.25548      | 67.04565 | 4.8554   | 0.5139   |
| 41            | 8.3065            | 149.3651       | 66.99645 | -5.7654  | 66.99645 | 8.3248            | 149.03675      | 67.14405 | 6.9202   | 5.8308   |
| 42            | 8.3358            | 148.8401       | 67.23277 | -5.9394  | 67.23277 | 8.3419            | 148.73124      | 67.28197 | -9.844   | -2.4846  |
| 43            | 8.3977            | 147.743        | 67.73202 | -9.433   | 67.73202 | 8.3727            | 148.18411      | 67.53039 | -6.7282  | -9.6101  |
| 44            | 8.4647            | 146.5736       | 68.27242 | 55.3182  | 68.27242 | 8.4203            | 147.34642      | 67.91431 | -5.1754  | 1.297    |
| 45            | 8.4681            | 146.5147       | 68.29984 | -43.1859 | 68.29984 | 8.4718            | 146.45071      | 68.32968 | 0.4926   | -0.039   |
| 46            | 8.5163            | 145.6855       | 68.6886  | 8.7241   | 68.6886  | 8.5455            | 145.18765      | 68.92411 | -2.0722  | 15.1272  |
| 47            | 8.5476            | 145.152        | 68.94105 | -9.5148  | 68.94105 | 8.5891            | 144.45065      | 69.27577 | -13.228  | -18.5797 |
| 48            | 8.6067            | 144.1553       | 69.41772 | 7.6241   | 69.41772 | 8.613             | 144.04982      | 69.46854 | 7.7041   | 3.2253   |
| 49            | 8.6431            | 143.5482       | 69.71131 | 7.1232   | 69.71131 | 8.6318            | 143.73608      | 69.62017 | 11.3842  | 8.9334   |
| 50            | 8.6732            | 143.05         | 69.95408 | -12.1333 | 69.95408 | 8.6514            | 143.41044      | 69.77825 | 2.1028   | -5.5594  |
| 51            | 8.6825            | 142.8968       | 70.02909 | 16.6379  | 70.02909 | 8.6591            | 143.28292      | 69.84036 | -14.1763 | -12.8312 |
| 52            | 8.6901            | 142.7718       | 70.09039 | -0.7292  | 70.09039 | 8.6891            | 142.78822      | 70.08232 | 1.4665   | 2.7739   |
| 53            | 8.7555            | 141.7053       | 70.61788 | -10.9529 | 70.61788 | 8.7471            | 141.84142      | 70.55013 | 5.3073   | 6.5065   |
| 54            | 8.7764            | 141.3679       | 70.78645 | 5.5706   | 70.78645 | 8.756             | 141.69725      | 70.62191 | 2.8488   | -2.8364  |
| 55            | 8.8444            | 140.281        | 71.3349  | -26.1376 | 71.3349  | 8.8071            | 140.8751       | 71.03406 | 9.9859   | -4.4145  |
| 56            | 8.8812            | 139.6997       | 71.63172 | 2.431    | 71.63172 | 8.8412            | 140.33175      | 71.30909 | -26.6818 | 6.7013   |
| 57            | 8.9076            | 139.2857       | 71.84465 | 7.8742   | 71.84465 | 8.9028            | 139.36077      | 71.80593 | -4.7461  | -0.1488  |
| 58            | 8.9156            | 139.1607       | 71.90917 | 0.9461   | 71.90917 | 8.9078            | 139.28255      | 71.84626 | -21.1992 | -21.3012 |
| 59            | 8.9611            | 138.4541       | 72.27615 | 20.8241  | 72.27615 | 8.9295            | 138.94407      | 72.02128 | -13.3779 | 26.5565  |
| 60            | 8.9745            | 138.2474       | 72.38423 | 5.0188   | 72.38423 | 8.9482            | 138.65371      | 72.17211 | 2.6145   | -16.4936 |
| 61            | 8.9944            | 137.9415       | 72.54474 | -0.1106  | 72.54474 | 8.9666            | 138.36918      | 72.32051 | -4.0153  | -6.8572  |
| 62            | 9.0275            | 137.4357       | 72.81117 | -5.2499  | 72.81117 | 8.9909            | 137.99521      | 72.51651 | 4.2307   | -5.5977  |
| 63            | 9.0634            | 136.8914       | 73.10126 | 0.8912   | 73.10126 | 9.0067            | 137.75313      | 72.64394 | 12.9026  | 3.2999   |
| 64            | 9.1071            | 136.2345       | 73.45372 | 10.3805  | 73.45372 | 9.0249            | 137.47533      | 72.79073 | 2.1937   | -1.2043  |
| 65            | 9.128             | 135.9226       | 73.62229 | -37.6371 | 73.62229 | 9.0878            | 136.52381      | 73.29806 | -3.7226  | -1.1551  |

<sup>a</sup> Excitation energy. <sup>b</sup> Wavelength. <sup>c</sup> Oscillator strength. <sup>d</sup> Rotatory strength in length form ( $10^{-40}$ cgs.). <sup>e</sup> Rotatory strength in velocity form ( $10^{-40}$ cgs.)

**Table S4.** Calculated ECD data for conformers **2-C3** and **2-C4** at the Cam-B3LYP/TZVP//M06-2X/6-311+G(d,p) level in MeOH

| Excited State | 2-C3              |                |          |          |          | 2-C4              |                |          |          |          |
|---------------|-------------------|----------------|----------|----------|----------|-------------------|----------------|----------|----------|----------|
|               | $\Delta E^a$ (eV) | $\lambda^b$ nm | $f^c$    | $Rlen^d$ | $Rvel^e$ | $\Delta E^a$ (eV) | $\lambda^b$ nm | $f^c$    | $Rlen^d$ | $Rvel^e$ |
| 1             | 3.302             | 375.74231      | 26.63243 | -29.7383 | -27.0569 | 3.2851            | 377.67529      | 26.49612 | 37.0784  | 35.56    |
| 2             | 4.4846            | 276.65814      | 36.17074 | 50.9863  | 50.0977  | 4.4416            | 279.33652      | 35.82392 | -54.644  | -54.1334 |
| 3             | 4.8918            | 253.62875      | 39.45503 | 14.4539  | 15.5789  | 4.9006            | 253.17331      | 39.52601 | -17.6068 | -19.0161 |
| 4             | 5.4268            | 228.62481      | 43.7701  | -15.6514 | -14.8884 | 5.3691            | 231.08176      | 43.30472 | 32.9852  | 31.8779  |
| 5             | 5.5074            | 225.27892      | 44.42018 | -8.4063  | -7.8779  | 5.5826            | 222.24431      | 45.02671 | 15.7506  | 15.8538  |
| 6             | 5.5903            | 221.9382       | 45.08881 | -21.0214 | -18.3102 | 5.5967            | 221.6844       | 45.14043 | -0.4083  | -0.8829  |
| 7             | 5.5961            | 221.70817      | 45.13559 | 0.2135   | -0.2514  | 5.6892            | 218.08006      | 45.8865  | 16.3226  | 18.671   |
| 8             | 5.8684            | 211.42068      | 47.33184 | -11.2003 | -11.223  | 5.8967            | 210.40601      | 47.5601  | 26.4101  | 25.1807  |
| 9             | 5.9621            | 208.098        | 48.08758 | -15.4801 | -14.7205 | 6.3251            | 196.15518      | 51.01538 | -1.0448  | -0.902   |
| 10            | 6.3825            | 194.39108      | 51.47834 | 5.7689   | 6.2458   | 6.3792            | 194.49164      | 51.45172 | -18.2743 | -18.4525 |
| 11            | 6.5424            | 189.64006      | 52.76802 | 2.6323   | 2.7974   | 6.5595            | 189.14568      | 52.90594 | -13.9813 | -13.2417 |
| 12            | 6.6138            | 187.59278      | 53.3439  | 22.8562  | 21.8014  | 6.6143            | 187.57859      | 53.34793 | 13.3495  | 12.7452  |
| 13            | 6.6207            | 187.39727      | 53.39955 | 13.6934  | 13.643   | 6.6312            | 187.10054      | 53.48424 | -31.4815 | -31.111  |
| 14            | 6.7756            | 183.1131       | 54.6489  | -7.5585  | -7.2471  | 6.6791            | 185.75872      | 53.87058 | -1.4983  | -1.8785  |
| 15            | 6.9752            | 177.87319      | 56.25879 | 15.2235  | 13.9829  | 6.8559            | 180.96838      | 55.29657 | 49.4301  | 46.5908  |
| 16            | 7.0464            | 176.07588      | 56.83305 | 11.2333  | 12.2931  | 6.9602            | 178.25653      | 56.1378  | -34.4539 | -32.7823 |
| 17            | 7.0512            | 175.95602      | 56.87177 | -3.4581  | -3.776   | 7.04              | 176.23595      | 56.78143 | -10.6236 | -11.3604 |
| 18            | 7.1585            | 173.31859      | 57.7372  | 6.1476   | 5.9067   | 7.0735            | 175.4013       | 57.05163 | -8.2446  | -8.1184  |
| 19            | 7.1997            | 172.32678      | 58.0695  | -25.6415 | -24.3423 | 7.1745            | 172.93206      | 57.86625 | 27.6644  | 29.0409  |
| 20            | 7.2151            | 171.95896      | 58.19371 | 13.0369  | 10.7131  | 7.1796            | 172.80922      | 57.90738 | -19.4111 | -13.6695 |
| 21            | 7.2864            | 170.27628      | 58.76878 | -14.1479 | -15.3328 | 7.2205            | 171.83036      | 58.23727 | 2.4447   | 2.7343   |
| 22            | 7.3167            | 169.57113      | 59.01317 | -10.9089 | -10.9228 | 7.3252            | 169.37437      | 59.08173 | -5.3183  | -8.2406  |
| 23            | 7.4312            | 166.95838      | 59.93668 | 2.8303   | 3.0013   | 7.3675            | 168.40191      | 59.4229  | -8.8837  | -9.6797  |
| 24            | 7.467             | 166.15791      | 60.22542 | -5.3312  | -5.2476  | 7.3845            | 168.01423      | 59.56001 | 27.9468  | 27.1198  |
| 25            | 7.5034            | 165.35185      | 60.51901 | -0.8652  | -0.8876  | 7.4816            | 165.83366      | 60.34318 | 4.4116   | 3.7669   |
| 26            | 7.5932            | 163.39634      | 61.24329 | -0.8576  | -1.7144  | 7.5141            | 165.11639      | 60.60531 | -13.3887 | -14.1177 |
| 27            | 7.6319            | 162.56779      | 61.55543 | -7.1353  | -6.9897  | 7.5783            | 163.7176       | 61.12312 | 1.5571   | 1.6625   |
| 28            | 7.6763            | 161.62749      | 61.91354 | 3.8455   | 3.9216   | 7.6543            | 162.09204      | 61.7361  | 4.866    | 3.9092   |
| 29            | 7.7778            | 159.51826      | 62.73219 | -10.7368 | -11.6033 | 7.7759            | 159.55723      | 62.71687 | -1.514   | -1.4869  |
| 30            | 7.8546            | 157.95853      | 63.35163 | -6.0094  | -6.2282  | 7.8894            | 157.26178      | 63.63231 | 0.3567   | 0.3971   |
| 31            | 7.8893            | 157.26377      | 63.6315  | 0.5897   | 0.5937   | 7.96              | 155.86697      | 64.20174 | 36.619   | 36.8256  |
| 32            | 7.9965            | 155.15552      | 64.49613 | 1.6383   | 5.4792   | 7.9714            | 155.64407      | 64.29368 | -2.8068  | 1.4381   |
| 33            | 8.0165            | 154.76843      | 64.65744 | -7.6333  | -8.1076  | 8.0209            | 154.68353      | 64.69293 | -11.3348 | -10.8863 |
| 34            | 8.0431            | 154.25658      | 64.87198 | 34.9041  | 33.9608  | 8.0612            | 153.91022      | 65.01797 | 12.5803  | 2.3388   |
| 35            | 8.0829            | 153.49702      | 65.19299 | -17.9097 | -15.328  | 8.0785            | 153.58063      | 65.1575  | -11.7899 | -8.7906  |
| 36            | 8.1555            | 152.1306       | 65.77855 | -13.5585 | -11.8535 | 8.1302            | 152.60401      | 65.57449 | 7.0535   | 7.8874   |
| 37            | 8.1575            | 152.0933       | 65.79468 | 0.4093   | 0.2826   | 8.1791            | 151.69164      | 65.9689  | 0.5682   | 0.8507   |
| 38            | 8.2095            | 151.12992      | 66.21409 | -4.3734  | -3.9928  | 8.2249            | 150.84695      | 66.3383  | -21.055  | -21.9605 |
| 39            | 8.2611            | 150.18594      | 66.63027 | 5.1336   | 5.3137   | 8.3009            | 149.46585      | 66.95128 | 0.125    | -2.8764  |
| 40            | 8.2943            | 149.58479      | 66.89805 | 2.217    | 0.5139   | 8.3152            | 149.20881      | 67.06662 | -19.0022 | -16.5554 |
| 41            | 8.3077            | 149.34351      | 67.00613 | 7.8839   | 5.8308   | 8.3296            | 148.95086      | 67.18276 | -8.9834  | -8.3244  |
| 42            | 8.3425            | 148.72054      | 67.28681 | -3.5951  | -2.4846  | 8.3699            | 148.23368      | 67.5078  | 9.5459   | 7.3503   |
| 43            | 8.3921            | 147.84155      | 67.68686 | -9.4444  | -9.6101  | 8.3888            | 147.89971      | 67.66024 | 33.5765  | 34.3846  |
| 44            | 8.4447            | 146.92068      | 68.11111 | 3.0937   | 1.297    | 8.4791            | 146.32462      | 68.38856 | -36.21   | -37.1556 |
| 45            | 8.4561            | 146.72261      | 68.20305 | 6.1784   | -0.039   | 8.4853            | 146.21771      | 68.43857 | 7.2811   | 6.6992   |
| 46            | 8.47              | 146.48183      | 68.31516 | 11.6749  | 15.1272  | 8.5166            | 145.68033      | 68.69102 | 11.3619  | 10.7885  |
| 47            | 8.4916            | 146.10923      | 68.48938 | -17.3593 | -18.5797 | 8.5388            | 145.30158      | 68.87007 | 3.2249   | 2.9824   |
| 48            | 8.5496            | 145.11803      | 68.95718 | 2.5      | 3.2253   | 8.5566            | 144.99931      | 69.01364 | 41.935   | 42.7775  |
| 49            | 8.5899            | 144.4372       | 69.28222 | 8.4729   | 8.9334   | 8.5602            | 144.93833      | 69.04268 | -21.0096 | -19.7734 |
| 50            | 8.6247            | 143.85441      | 69.5629  | -6.2229  | -5.5594  | 8.611             | 144.08328      | 69.45241 | 8.8159   | 8.6538   |
| 51            | 8.6462            | 143.49669      | 69.73631 | -11.8613 | -12.8312 | 8.6473            | 143.47844      | 69.74518 | 1.1613   | 1.4941   |
| 52            | 8.6706            | 143.09288      | 69.93311 | 2.7658   | 2.7739   | 8.6539            | 143.36901      | 69.79842 | 4.2839   | 4.463    |
| 53            | 8.6805            | 142.92968      | 70.01296 | 6.0681   | 6.5065   | 8.6799            | 142.93956      | 70.00812 | 4.9275   | 8.4591   |
| 54            | 8.7097            | 142.4505       | 70.24847 | -2.9     | -2.8364  | 8.7162            | 142.34427      | 70.3009  | 3.0867   | 6.8111   |
| 55            | 8.7528            | 141.74905      | 70.5961  | -3.7776  | -4.4145  | 8.7531            | 141.74419      | 70.59852 | -3.7131  | -4.8499  |
| 56            | 8.8109            | 140.81434      | 71.06471 | 7.5726   | 6.7013   | 8.792             | 141.11705      | 70.91227 | 7.6084   | 7.203    |
| 57            | 8.8595            | 140.04189      | 71.45669 | -0.8242  | -0.1488  | 8.8118            | 140.79996      | 71.07197 | -4.0224  | -3.3027  |
| 58            | 8.8755            | 139.78943      | 71.58574 | -24.0941 | -21.3012 | 8.8865            | 139.6164       | 71.67446 | 2.4636   | 2.408    |
| 59            | 8.909             | 139.26379      | 71.85594 | 28.9846  | 26.5565  | 8.9032            | 139.35451      | 71.80916 | -0.5752  | -2.6212  |
| 60            | 8.9203            | 139.08737      | 71.94708 | -22.9018 | -16.4936 | 8.9136            | 139.19192      | 71.89304 | -8.0571  | -5.662   |
| 61            | 8.9637            | 138.41395      | 72.29712 | -10.2558 | -6.8572  | 8.9351            | 138.85699      | 72.06645 | -24.6495 | -20.2925 |
| 62            | 8.9737            | 138.2597       | 72.37778 | -1.9975  | -5.5977  | 8.9452            | 138.70021      | 72.14791 | -37.9874 | -39.8575 |
| 63            | 8.9866            | 138.06124      | 72.48182 | 6.4346   | 3.2999   | 8.9612            | 138.45256      | 72.27696 | -0.3881  | -2.5053  |
| 64            | 9.0341            | 137.33533      | 72.86494 | -0.8125  | -1.2043  | 8.9798            | 138.16578      | 72.42698 | -2.2297  | -1.2313  |
| 65            | 9.0759            | 136.70282      | 73.20208 | -0.3045  | -1.1551  | 8.9923            | 137.97372      | 72.5278  | 11.337   | 9.381    |

<sup>a</sup> Excitation energy. <sup>b</sup> Wavelength. <sup>c</sup> Oscillator strength. <sup>d</sup> Rotatory strength in length form ( $10^{-40}$ cgs.). <sup>e</sup> Rotatory strength in velocity form ( $10^{-40}$ cgs.)

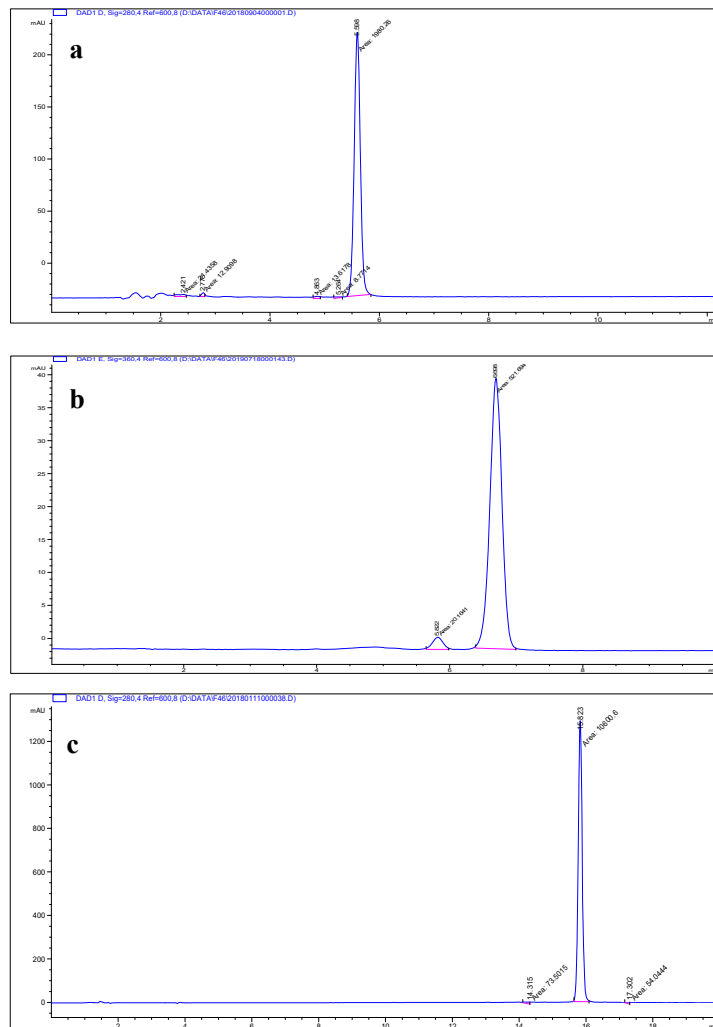

**Figure S33.** The HPLC analysis of **1–3** (a) Compound **1** (Capcell MGII 5 $\mu$ M, 3.0 mm  $\times$  150 mm, 65%ACN in 5 mM NH<sub>4</sub>AC). (b) Compound **2** (Capcell MGII 5 $\mu$ M, 3.0 mm  $\times$  150 mm, 70%ACN in 5 mM NH<sub>4</sub>AC). (c) Compound **3** (Capcell MGII 5 $\mu$ M, 3.0 mm  $\times$  150 mm, 0-10 min: 50-95%ACN in 5 mM NH<sub>4</sub>AC; 10-20 min: 95%ACN in 5 mM NH<sub>4</sub>AC 10min)
